# Supplementary material for: Defining cellular population dynamics at single-cell resolution during prostate cancer progression
Source: eLife. 2022 Dec 13;11:e79076. doi: 10.7554/eLife.79076 (PMC9747158; doi:10.7554/eLife.79076)
Supplement: Supplementary file 1. — (A) Quality control measures for each mouse replicate. (B) Breakdown of cell ID numbers and relative abundance (%) per mouse condition. (C) Breakdown of cell ID numbers and relative abundance (%) per mouse replicate. (D) Genes upregulated in Ptenfl/fl compared to WT mice for each epithelial subtype. Thresholds set at avg_log2FC >0.25 and FDR <0.05. (E) Breakdown of cell cycle phase assignment for every cell ID in WT and Ptenfl/fl mice. (F) Differentially expressed genes between hyper-proliferative and hypo-proliferative basal cells in Ptenfl/fl mice. Thresholds set at avg_log2FC >0.25 and FDR <0.05. Positive avg_log2FC values indicate upregulation in hypo-proliferative basal cells. [file elife-79076-supp1.xlsx]

## Sheet: S1A Sample_info
sample_ID	sample_Name	genotype	replicate	n_mice	# cells	# UMIs	Avg UMIs	Avg genes	% mito	% ribo
Sample_B5	WT_1	WT	1	1	5507	18238910	3311.95	896.492	1.06278	15.0416
Sample_C5	WT_2	WT	2	1	3124	9638099	3085.18	913.313	0.935016	15.9636
Sample_D5	WT_3	WT	3	1	4522	7333478	1621.73	692.956	1.80016	18.7543
Sample_A8	Pten_2	Pten	2	1	4424	13078859	2956.34	1272.41	0.587134	21.3481
Sample_F6	Pten_3	Pten	3	1	6502	24686981	3796.83	1463.39	0.554181	16.703
Sample_D12	Pten_cx_1	Pten_cx	1	1	4841	12600918	2602.96	1235.15	0.417558	18.6649
Sample_B8	Pten_cx_2	Pten_cx	2	1	5103	14146798	2772.25	1262.53	0.38397	20.2808
Sample_G6	Pten_cx_3	Pten_cx	3	1	7306	30027426	4109.97	1586.11	0.292115	16.0254
Sample_C8	Pten_cx_4EBP1M_1	Pten_cx_4EBP1M	1	1	4839	9915038	2048.98	1015.51	0.41659	20.7049
Sample_H6	Pten_cx_4EBP1M_2	Pten_cx_4EBP1M	2	1	4612	16575605	3594.02	1467.79	0.333313	16.6776
Sample_B2	WT_castrate-1	WT_castrate	1	3	6938	16380856	2361.03	1018.39	1.07353	26.9877
Sample_A12	WT_castrate-2	WT_castrate	2	3	1250	2319804	1855.84	901.075	0.828953	23.5211
Sample_H3	WT_castrate-3	WT_castrate	3	3	5984	12651137	2114.16	920.39	1.14601	27.0934

## Sheet: S1B Cell_numbers_genotype
Cell Type	Cell Subtype	No of cells: WT	No of cells: Pten	No of cells: Pten_cx	No of cells: Pten_cx_4EBP1M	No of cells: WT_cx	Total no of cells	% of WT	% of Pten	% of Pten_cx	% of Pten_cx_4EBP1M	% of WT_cx
Epithelial	Basal	2782	1795	2718	1565	4186	13046	19.0431	16.0871	15.7474	16.5172	54.848
Epithelial	Urethral	779	197	0	0	0	976	5.33233	1.76555	0	0	0
Epithelial	Luminal progenitor	677	35	10	24	100	846	4.63413	0.313676	0.0579374	0.253298	1.31027
Epithelial	Intermediate	886	2391	8230	4760	0	16267	6.06475	21.4286	47.6825	50.2375	0
Epithelial	Luminal cx	0	0	0	0	3346	3346	0	0	0	0	43.8417
Epithelial	Differentiated	5626	1728	0	0	0	7354	38.5105	15.4866	0	0	0
Stroma	Endothelial	160	121	151	63	N/A	495	1.09522	1.08442	0.874855	0.664908	N/A
Stroma	Fibroblasts	1983	1027	1027	744	N/A	4781	13.5738	9.20416	5.95017	7.85224	N/A
Stroma	Stromal	560	304	296	172	N/A	1332	3.83325	2.7245	1.71495	1.8153	N/A
B-cells	B-cells	100	141	240	171	N/A	652	0.68451	1.26367	1.3905	1.80475	N/A
T cells	CD8	65	657	717	270	N/A	1709	0.444931	5.88815	4.15411	2.8496	N/A
T cells	NKT	150	163	159	161	N/A	633	1.02676	1.46084	0.921205	1.69921	N/A
T cells	Delta-Gamma	50	108	158	108	N/A	424	0.342255	0.967915	0.915411	1.13984	N/A
Neutrophils	MDSC	0	255	1808	679	N/A	2742	0	2.28536	10.4751	7.16623	N/A
Dendritic cells	Dendritic cells	214	426	366	160	N/A	1166	1.46485	3.81789	2.12051	1.68865	N/A
Macrophages	M2	138	383	74	61	N/A	656	0.944623	3.43251	0.428737	0.643799	N/A
Macrophages	TAM	82	1346	1290	526	N/A	3244	0.561298	12.0631	7.47393	5.55145	N/A
Macrophages	TRM	357	81	16	11	N/A	465	2.4437	0.725937	0.0926999	0.116095	N/A

## Sheet: S1C Cell_numbers_sample
Cell Types	Cell Subtypes	No of cells: WT_1	No of cells: WT_2	No of cells: WT_3	No of cells: Pten_2	No of cells: Pten_3	No of cells: Pten_cx_1	No of cells: Pten_cx_2	No of cells: Pten_cx_3	No of cells: Pten_cx_4EBP1M_1	No of cells: Pten_cx_4EBP1M_2	No of cells: WT_cx_1	No of cells: WT_cx_2	No of cells: WT_cx_3
Epithelial	Basal	1023	618	1141	904	891	787	861	1070	994	571	2068	275	1843
Epithelial	Urethral	0	1	778	197	0	0	0	0	0	0	0	0	0
Epithelial	Luminal progenitor	78	115	484	19	16	2	8	0	18	6	72	8	20
Epithelial	Intermediate	136	218	532	1253	1138	2232	2623	3375	2489	2271	0	0	0
Epithelial	Luminal cx	0	0	0	0	0	0	0	0	0	0	1584	617	1145
Epithelial	Differentiated	3155	1444	1027	200	1528	0	0	0	0	0	0	0	0
Stroma	Endothelial	71	34	55	71	50	75	44	32	42	21	N/A	N/A	N/A
Stroma	Fibroblasts	479	351	1153	606	421	385	384	258	473	271	N/A	N/A	N/A
Stroma	Stromal	201	114	245	186	118	115	99	82	110	62	N/A	N/A	N/A
B-cells	B-cells	48	15	37	32	109	30	83	127	41	130	N/A	N/A	N/A
T cells	CD8	20	31	14	217	440	211	213	293	125	145	N/A	N/A	N/A
T cells	NKT	62	56	32	43	120	41	73	45	73	88	N/A	N/A	N/A
T cells	Delta-Gamma	15	15	20	43	65	71	41	46	41	67	N/A	N/A	N/A
Neutrophils	MDSC	0	0	0	38	217	166	181	1461	45	634	N/A	N/A	N/A
Dendritic cells	Dendritic cells	68	37	109	178	248	191	94	81	80	80	N/A	N/A	N/A
Macrophages	M2	44	36	58	114	269	12	40	22	34	27	N/A	N/A	N/A
Macrophages	TAM	18	34	30	518	828	518	361	411	283	243	N/A	N/A	N/A
Macrophages	TRM	167	121	69	21	60	7	6	3	9	2	N/A	N/A	N/A
Cell Types	Cell Subtypes	% of cells: WT_1	% of cells: WT_2	% of cells: WT_3	% of cells: Pten_2	% of cells: Pten_3	% of cells: Pten_cx_1	% of cells: Pten_cx_2	% of cells: Pten_cx_3	% of cells: Pten_cx_4EBP1M_1	% of cells: Pten_cx_4EBP1M_2	% of cells: WT_cx_1	% of cells: WT_cx_2	% of cells: WT_cx_3
Epithelial	Basal	18.3169	19.0741	19.7268	19.4828	13.6698	16.2503	16.846	14.6455	20.4653	12.3647	55.5317	30.5556	61.2699
Epithelial	Urethral	0	0.0308642	13.4509	4.24569	0	0	0	0	0	0	0	0	0
Epithelial	Luminal progenitor	1.3966	3.54938	8.36791	0.409483	0.245474	0.0412967	0.156525	0	0.370599	0.129926	1.9334	0.888889	0.664894
Epithelial	Intermediate	2.43509	6.7284	9.19779	27.0043	17.4593	46.0871	51.3207	46.1949	51.2456	49.1771	0	0	0
Epithelial	Luminal cx	0	0	0	0	0	0	0	0	0	0	42.5349	68.5556	38.0652
Epithelial	Differentiated	56.4906	44.5679	17.7559	4.31034	23.4428	0	0	0	0	0	0	0	0
Stroma	Endothelial	1.27126	1.04938	0.950899	1.53017	0.767106	1.54863	0.860888	0.437996	0.864731	0.454742	N/A	N/A	N/A
Stroma	Fibroblasts	8.57654	10.8333	19.9343	13.0603	6.45904	7.94962	7.51321	3.53134	9.73852	5.86834	N/A	N/A	N/A
Stroma	Stromal	3.59893	3.51852	4.23582	4.00862	1.81037	2.37456	1.937	1.12237	2.26477	1.34257	N/A	N/A	N/A
B-cells	B-cells	0.859445	0.462963	0.639696	0.689655	1.67229	0.619451	1.62395	1.7383	0.844142	2.81507	N/A	N/A	N/A
T cells	CD8	0.358102	0.95679	0.242047	4.67672	6.75054	4.3568	4.16748	4.0104	2.57361	3.13989	N/A	N/A	N/A
T cells	NKT	1.11012	1.7284	0.55325	0.926724	1.84106	0.846583	1.42829	0.615932	1.50299	1.90559	N/A	N/A	N/A
T cells	Delta-Gamma	0.268577	0.462963	0.345781	0.926724	0.997238	1.46603	0.802191	0.629619	0.844142	1.45084	N/A	N/A	N/A
Neutrophils	MDSC	0	0	0	0.818966	3.32924	3.42763	3.54138	19.9973	0.926498	13.7289	N/A	N/A	N/A
Dendritic cells	Dendritic cells	1.21755	1.14198	1.88451	3.83621	3.80485	3.94384	1.83917	1.10868	1.64711	1.73235	N/A	N/A	N/A
Macrophages	M2	0.787825	1.11111	1.00277	2.4569	4.12703	0.24778	0.782626	0.301122	0.700021	0.584669	N/A	N/A	N/A
Macrophages	TAM	0.322292	1.04938	0.518672	11.1638	12.7033	10.6958	7.0632	5.62551	5.82664	5.26202	N/A	N/A	N/A
Macrophages	TRM	2.99015	3.73457	1.19295	0.452586	0.920528	0.144539	0.117394	0.0410621	0.1853	0.0433088	N/A	N/A	N/A

## Sheet: S1D WT vs PTEN
Basal				Luminal progenitor vs Intermediate				Differentiated
gene	avg_log2FC	p_val	FDR	gene	avg_log2FC	p_val	FDR	gene	avg_log2FC	p_val	FDR
Dapl1	2.32219	0	0	Ifitm3	3.04978	4.72657e-307	6.33833e-304	Pigr	2.934	0	0
B2m	1.91515	0	0	Wfdc18	5.87038	2.42519e-288	1.62609e-285	Lcn2	3.65744	0	0
Wfdc2	2.20331	0	0	Irf7	2.68882	4.06311e-255	1.81621e-252	S100a11	2.90394	0	0
S100a6	1.67989	0	0	Isg15	3.04564	8.82218e-224	2.36611e-221	Slc39a8	1.78297	0	0
Igfbp7	1.88528	0	0	Nupr1	2.21772	2.39394e-207	4.58611e-205	Oasl2	1.00295	0	0
Lgals7	1.82633	0	0	B2m	1.50251	9.04058e-205	1.34705e-202	Gm15920	1.73691	0	0
Ucp2	1.34332	0	0	H2-K1	1.74921	5.43584e-201	7.28946e-199	Saa1	3.47094	0	0
Ifitm3	1.39856	0	0	Bst2	2.42348	3.93296e-196	4.39509e-194	Ifitm3	2.44396	0	0
Tcim	1.63902	0	0	Ifi27l2a	3.54073	3.74546e-192	3.86359e-190	Irf7	2.07947	0	0
Lgals3	2.24259	0	0	Lcn2	3.02663	1.15352e-190	1.1049e-188	Arg1	1.90457	0	0
Rack1	1.29534	0	0	H2-D1	1.48616	2.7591e-186	2.46664e-184	Tpt1	1.11737	0	0
Gpx2	1.94528	0	0	Rtp4	1.77933	1.21169e-176	1.01555e-174	Pkm	2.07139	0	0
Ifi27	1.71664	0	0	Mif	1.88556	1.38009e-174	1.08865e-172	Eef1a1	1.12794	0	0
Ly6a	2.09598	0	0	Basp1	2.12844	5.46657e-173	4.07259e-171	Wfdc18	5.80539	0	0
Rtp4	1.53769	0	0	Oasl2	1.79496	9.72366e-173	6.86286e-171	Actg1	1.24802	0	0
Ltbp1	1.6746	0	0	Gpx2	1.96859	2.48136e-165	1.66375e-163	Ifi27	2.00625	0	0
Anxa1	1.80528	0	0	Ifit1	2.41737	9.08558e-161	5.53808e-159	Ly6a	4.09134	0	0
Clu	1.96972	7.33113e-305	4.79089e-303	Reg3g	4.30691	3.88558e-159	2.26546e-157	Ly6c1	3.73985	0	0
H2-D1	1.55046	1.44637e-303	9.00193e-302	Ly6c1	2.07406	5.93873e-159	3.31827e-157	Rtp4	1.44159	0	0
Ifi27l2a	2.51832	8.94528e-298	5.31431e-296	Atox1	1.23213	3.17315e-158	1.70208e-156	Lrg1	3.14502	0	0
Cd44	1.4354	3.06237e-294	1.74022e-292	Gm15920	1.55614	8.42573e-151	4.34573e-149	Spink5	2.54031	0	0
Il33	1.63988	2.50082e-292	1.36191e-290	Cd44	1.75903	2.5902e-146	1.28647e-144	Ifit1	1.61849	0	0
Bst2	1.75269	4.23528e-287	2.2142e-285	H2-Q7	1.84968	8.78842e-143	4.20902e-141	Clu	3.54247	3.72568e-307	3.15043e-305
Eef1a1	0.956375	4.00997e-274	1.94112e-272	Lgals3bp	1.65504	1.05688e-142	4.88715e-141	Ifi27l2a	1.58788	4.5656e-305	3.71219e-303
Pmepa1	1.26894	4.17764e-273	1.95006e-271	Qsox1	1.80602	9.35537e-140	4.13546e-138	Isg15	1.46522	1.30247e-300	1.01979e-298
Irf7	1.67328	6.50473e-272	2.93161e-270	Ly6a	1.45726	9.55999e-140	4.13546e-138	Gm19220	1.08853	4.59792e-296	3.47143e-294
Krt19	1.8342	5.22035e-271	2.27433e-269	Apol9a	1.59936	1.55233e-136	6.30809e-135	Lgals3	1.5913	8.47632e-293	6.17894e-291
S100a14	1.35738	2.91178e-268	1.22764e-266	Usp18	1.5922	3.24209e-128	1.27872e-126	Hsp90ab1	1.20088	1.43456e-288	1.01088e-286
H2-K1	1.49284	5.55673e-268	2.26958e-266	Ltf	3.27055	1.37963e-126	5.13912e-125	Gpx2	1.74571	2.29954e-288	1.56814e-286
Gm15920	1.1557	7.53445e-266	2.9841e-264	Tapbp	1.24755	7.2839e-123	2.63992e-121	Nupr1	1.70554	1.69729e-287	1.12127e-285
Mfge8	1.34407	1.25352e-262	4.81867e-261	Psmb8	1.40059	1.24324e-120	4.38731e-119	Usp18	0.883854	1.12222e-285	7.18899e-284
Tagln2	1.28052	7.29838e-253	2.72542e-251	Prom1	1.48187	8.20047e-118	2.8197e-116	Mmp15	1.09145	6.05672e-284	3.76586e-282
S100a11	1.16866	1.13509e-249	4.121e-248	Gapdh	1.2268	2.55567e-116	8.35891e-115	Gapdh	1.7653	4.34932e-281	2.62699e-279
Isg15	1.52917	8.41462e-248	2.97241e-246	Ifit3	2.44657	5.25152e-116	1.67673e-114	Krt19	1.73839	5.85677e-280	3.43922e-278
Flnb	1.14416	3.75414e-240	1.29123e-238	H2-T22	1.38714	3.38215e-113	1.05476e-111	Tspan1	1.5221	2.62246e-278	1.49835e-276
Urah	1.06232	1.03616e-239	3.47246e-238	Pmaip1	1.46901	7.11028e-110	2.13723e-108	Tacstd2	1.075	2.56038e-269	1.42438e-267
Lmo1	1.14482	1.24678e-238	4.07386e-237	Ctsb	1.23811	7.17192e-110	2.13723e-108	Lgals3bp	1.1084	5.09419e-265	2.76131e-263
Fst	2.77171	1.3407e-237	4.27389e-236	Ifi44	1.27779	5.10829e-106	1.48918e-104	Tpi1	1.57383	8.75716e-262	4.62816e-260
Hsp90ab1	0.960859	2.50805e-225	7.62329e-224	Sox4	1.33313	2.16819e-100	6.05737e-99	Oxct1	1.96984	7.37759e-258	3.80396e-256
Capg	1.00847	1.36188e-219	4.04539e-218	Rnf213	1.31809	6.45669e-100	1.76703e-98	Ldha	1.78079	1.88909e-257	9.5084e-256
Ly6c1	1.44958	1.02876e-218	2.98797e-217	Oas3	1.09304	2.50982e-99	6.73135e-98	Anxa3	1.31966	1.72751e-252	8.49294e-251
Tacstd2	1.1077	2.08472e-215	5.92332e-214	Plet1	1.23637	2.70249e-99	7.10595e-98	H2-D1	1.8827	8.42665e-252	4.04862e-250
Ifi202b	1.82858	1.26817e-210	3.52659e-209	Stat1	1.26241	6.72198e-99	1.7335e-97	B2m	1.29319	1.05641e-250	4.9628e-249
Serinc2	0.875551	7.17839e-209	1.95462e-207	Ldha	1.15871	1.02791e-96	2.60081e-95	Krt8	1.6083	5.40484e-250	2.48388e-248
Tbc1d1	0.992874	4.08603e-207	1.08989e-205	Pkm	1.04691	2.27808e-94	5.65724e-93	Sdc1	0.81934	3.35854e-247	1.51063e-245
4930523C07Rik	1.04709	6.52638e-207	1.706e-205	Tmprss4	1.02131	3.01517e-94	7.35154e-93	Shisa5	1.32845	9.11514e-243	4.01446e-241
Col17a1	0.951932	1.36263e-206	3.49209e-205	Zbp1	1.1912	3.36571e-94	8.05967e-93	Mfge8	0.884683	3.30491e-242	1.42583e-240
Psmb8	1.01752	5.31168e-205	1.33507e-203	Xaf1	1.13692	4.42501e-94	1.04104e-92	H2-K1	2.01143	2.4112e-240	1.01945e-238
Prelid1	0.927091	1.37488e-204	3.3905e-203	Pigr	1.31597	1.17749e-93	2.72245e-92	Pglyrp1	1.69102	2.44614e-238	1.01395e-236
Pdlim1	0.838367	7.38669e-191	1.75535e-189	Dapl1	2.03172	1.82226e-91	4.14179e-90	Psmb8	1.18585	2.7351e-234	1.11192e-232
Inhba	1.75326	4.05622e-190	9.46692e-189	Sdc1	1.04485	7.2965e-91	1.63077e-89	Hist1h2bc	1.60637	2.29825e-232	9.16699e-231
Tpt1	0.551298	2.82254e-189	6.47203e-188	Ly6d	2.71212	1.65255e-90	3.63291e-89	Pgk1	1.88876	1.35862e-229	5.31876e-228
Krt5	1.23344	1.79599e-187	4.04717e-186	Cib1	1.03929	1.07534e-89	2.32586e-88	Stat2	0.621062	5.60846e-228	2.15569e-226
Krt6a	1.46715	1.40229e-186	3.05465e-185	Mmp15	1.03297	2.98344e-88	6.35046e-87	Apol9a	0.694541	9.52832e-227	3.59694e-225
Igfbp5	1.58233	1.12842e-185	2.41777e-184	Lgals9	1.10598	4.40652e-88	9.23303e-87	Tac1	1.28059	1.89388e-226	7.02396e-225
Oasl2	0.956325	1.74298e-185	3.6743e-184	Phlda1	0.99153	1.00094e-87	2.06501e-86	Tmcc3	1.30623	5.6242e-223	2.04992e-221
Anxa3	0.899728	2.31439e-182	4.80143e-181	1110008P14Rik	1.01765	2.88258e-87	5.85687e-86	Mgst1	1.12351	1.32032e-222	4.73076e-221
Krt14	1.26829	4.91981e-182	1.00472e-180	Ifit3b	1.72828	3.08977e-87	6.18415e-86	Adh6a	1.07712	4.68252e-222	1.64981e-220
Cpe	0.828982	2.90224e-181	5.83573e-180	H2-Q4	1.15246	3.95918e-87	7.80773e-86	Cox4i1	0.807791	4.53247e-221	1.57076e-219
Shisa5	0.720419	7.06804e-181	1.39969e-179	Rsad2	2.3012	9.42813e-87	1.83234e-85	Qsox1	1.05672	2.31826e-220	7.90453e-219
Psmd8	0.746287	2.06131e-180	4.02109e-179	Urah	1.01666	7.6407e-86	1.46374e-84	Tmprss4	0.647366	9.89392e-220	3.26808e-218
Rac1	0.735082	4.64637e-180	8.93059e-179	Pglyrp1	1.81817	5.33972e-85	1.00853e-83	Wfdc2	2.22368	1.45337e-219	4.72681e-218
Cald1	1.33467	2.81827e-179	5.33838e-178	Arg1	1.57226	1.41634e-84	2.63794e-83	Wfdc17	0.952295	2.15667e-219	6.90787e-218
Klf5	0.866903	6.12865e-178	1.14431e-176	Tpi1	1.03859	9.52456e-84	1.74965e-82	Atpif1	1.32533	3.46691e-219	1.09389e-217
Cxcl16	0.744267	3.97026e-177	7.30863e-176	Dtx3l	0.910879	5.06335e-81	8.93416e-80	Lgals9	0.615056	9.68289e-217	3.01024e-215
Oxct1	0.896935	2.17801e-174	3.9537e-173	Cp	1.45652	8.61726e-81	1.50075e-79	Calm1	1.09647	2.52666e-214	7.63053e-213
Rnh1	0.708486	1.93769e-173	3.46926e-172	Shisa5	0.963111	3.11718e-80	5.35915e-79	Tax1bp1	1.79782	3.68455e-214	1.09706e-212
Lmo7	1.11984	4.66159e-172	8.23338e-171	Trim30a	0.988608	5.50981e-79	9.35273e-78	Rack1	1.15304	3.87819e-213	1.13868e-211
Tapbp	0.75209	1.11676e-171	1.94614e-170	Marcksl1	0.922849	1.49342e-78	2.50335e-77	Cdkn2a	0.906094	8.53902e-212	2.47281e-210
Sgk1	0.9147	1.23308e-169	2.12057e-168	Parp14	0.953912	5.12609e-78	8.38303e-77	Rps14	0.689209	8.86317e-210	2.53199e-208
Fhl2	0.824676	2.00994e-169	3.41167e-168	Gm19220	0.574678	1.03638e-75	1.65451e-74	Ppp1r1b	1.01527	9.30428e-210	2.62257e-208
Pgam1	0.838	7.01527e-169	1.17551e-167	Tnip3	1.04235	1.12417e-75	1.77354e-74	H3f3a	1.24057	2.58854e-207	7.20024e-206
Ldha	0.902784	5.13616e-167	8.49741e-166	Plk2	1.0304	4.47947e-75	6.98485e-74	Cd24a	1.29325	2.92122e-207	8.02007e-206
Ppa1	0.759911	4.18195e-166	6.83227e-165	Pgam1	0.934594	1.1113e-74	1.71293e-73	Ifi44	0.538573	4.28366e-207	1.16098e-205
Gapdh	1.00579	6.5418e-166	1.05557e-164	Stat2	0.944187	4.06297e-74	6.19142e-73	Tagln2	1.32481	1.03591e-206	2.77205e-205
Basp1	1.01393	1.25569e-165	2.00145e-164	Trim25	0.943052	4.67651e-74	7.04629e-73	Aldoa	1.55356	1.03716e-205	2.7407e-204
Fam162a	0.94671	3.28366e-165	5.17078e-164	Apol9b	0.994342	1.36454e-73	2.03316e-72	Cxcl2	2.15486	3.22774e-204	8.424e-203
Tm4sf1	1.35141	9.32701e-165	1.45124e-163	Mmp7	1.88159	4.33031e-73	6.3119e-72	H2-Q7	0.855268	3.77061e-201	9.72081e-200
Gjb4	1.01765	3.61863e-162	5.56418e-161	Sp100	0.914129	9.38497e-73	1.35325e-71	Cmas	1.30818	3.8223e-201	9.73536e-200
Pkm	0.88523	1.99672e-159	3.03454e-158	Tmcc3	1.22976	1.1813e-72	1.68524e-71	Irf9	0.764956	3.30278e-200	8.312e-199
Wfdc18	2.04095	2.75049e-159	4.13206e-158	Psme2	0.865348	8.3063e-72	1.16029e-70	Ahnak	0.882358	2.63943e-199	6.56442e-198
Cyp2f2	0.825862	4.50552e-158	6.69172e-157	Slfn2	1.10412	9.94921e-72	1.37545e-70	BC100530	1.26434	1.63943e-194	3.98362e-193
Phlda1	1.21346	2.57696e-157	3.78437e-156	H2-Q6	1.06797	1.56887e-71	2.1468e-70	Serpinb1a	0.826401	2.91756e-194	7.00878e-193
Msn	0.734001	9.28021e-156	1.34769e-154	Serinc2	0.77788	4.07612e-71	5.5213e-70	Fam162a	1.5233	3.73028e-193	8.86047e-192
Bok	0.76351	9.75428e-156	1.40097e-154	Ndrg1	0.989222	4.21944e-71	5.65827e-70	Hist1h1c	1.24183	6.53035e-192	1.53391e-190
Baz1a	0.626352	1.10266e-155	1.56649e-154	Idh1	0.980266	6.16074e-71	8.17975e-70	Tsc22d1	1.15157	5.90498e-191	1.37177e-189
Tpi1	0.789811	1.21476e-155	1.7072e-154	Ier5	0.89855	4.17137e-70	5.37866e-69	Ctsb	1.15385	6.16989e-191	1.41773e-189
Cd24a	0.759123	1.58138e-155	2.19879e-154	Krt6a	1.35138	7.22972e-70	9.23338e-69	Pdlim1	0.991809	5.88074e-190	1.32254e-188
Pgk1	0.84445	8.74736e-155	1.20345e-153	Cxcl2	2.26766	9.60315e-70	1.21489e-68	Pgap2	1.16562	1.02634e-189	2.28388e-188
Krt17	1.39573	9.03964e-155	1.23071e-153	Ifi27	0.931769	1.63358e-69	2.04731e-68	Phlda1	1.43661	2.37247e-187	5.17051e-186
Calcb	1.52596	1.09235e-154	1.47185e-153	Phf11d	1.0566	1.95464e-69	2.42701e-68	Arpc1b	1.38773	4.56852e-186	9.85494e-185
Cib1	0.742425	1.81606e-154	2.42203e-153	Pgk1	0.995038	3.69333e-69	4.54381e-68	BC064078	0.892249	4.05733e-185	8.66383e-184
Ap2s1	0.685997	3.59947e-154	4.75202e-153	Arpc1b	0.722062	1.99286e-66	2.40759e-65	Rps8	1.05618	3.90298e-183	8.25091e-182
Rtn4	0.664835	1.63503e-153	2.13698e-152	Gch1	0.785018	4.97139e-66	5.95235e-65	Pgam1	1.3477	6.60589e-183	1.38266e-181
Areg	1.44312	1.68008e-152	2.17413e-151	Kctd14	0.932469	1.01523e-65	1.19423e-64	Reg3g	2.83788	1.19737e-182	2.48161e-181
P4hb	0.691263	1.71419e-152	2.19652e-151	Ccdc71l	0.914701	1.15776e-65	1.35005e-64	Anxa1	1.5396	1.49974e-182	3.07811e-181
Ywhah	0.705925	1.03721e-151	1.31615e-150	Sat1	0.797839	1.39961e-65	1.618e-64	Fabp5	2.42441	7.73937e-182	1.57318e-180
Uqcc2	0.643206	8.0068e-151	1.00624e-149	Oas2	0.906389	1.70023e-65	1.94873e-64	Basp1	0.844056	9.92868e-182	1.99897e-180
Map1b	0.847246	7.02546e-150	8.74502e-149	Eif2ak2	0.772086	1.21599e-64	1.3819e-63	Rtn4	0.988812	2.02716e-181	4.04284e-180
Irf6	0.723443	1.92742e-149	2.37654e-148	S100a14	0.830956	3.26034e-64	3.67405e-63	Sprr1a	1.69215	1.12876e-180	2.2301e-179
Iqgap1	0.575514	5.45191e-149	6.65948e-148	Bax	0.877189	3.31533e-64	3.70488e-63	Sox4	0.878044	1.6395e-180	3.20918e-179
Ecm1	0.868185	5.97492e-149	7.23075e-148	Lrg1	1.05733	1.16422e-63	1.27969e-62	Ahr	0.727249	8.99918e-177	1.74534e-175
Abracl	0.648505	3.48767e-148	4.14398e-147	Smox	0.71035	1.65522e-63	1.80459e-62	Sprr2a3	1.70964	1.7655e-176	3.39296e-175
Stx3	0.613654	4.21412e-148	4.96204e-147	Pmepa1	0.758869	1.77011e-63	1.91429e-62	Pnrc1	1.25698	4.09597e-175	7.80079e-174
Mif	0.963665	6.34602e-148	7.40558e-147	Flnb	0.836862	2.03769e-63	2.18604e-62	Rps3	0.725057	5.69658e-175	1.07523e-173
Tspo	0.759914	1.30817e-147	1.51308e-146	Ddx58	0.736659	9.36259e-63	9.88602e-62	Cib1	1.13386	7.95292e-175	1.48783e-173
Ifit1	1.31169	1.96275e-147	2.23071e-146	Grn	0.850258	2.47096e-62	2.56865e-61	Rps24	0.675792	3.27017e-174	6.06416e-173
Fam3c	0.657525	2.40071e-147	2.70494e-146	Parp9	0.753183	3.78099e-62	3.87046e-61	Sat1	1.37482	6.66486e-173	1.22517e-171
Pgls	0.682743	2.45698e-147	2.74468e-146	Wfdc2	1.05277	1.17564e-61	1.19434e-60	Uqcr10	1.0347	6.43922e-172	1.17349e-170
Dap	0.587719	5.3425e-147	5.91749e-146	Marcks	0.711322	7.43682e-61	7.49833e-60	Sfn	0.828349	4.47687e-171	8.08898e-170
Pxdc1	0.867937	3.57494e-146	3.92643e-145	Anxa1	0.902162	8.99889e-61	9.00561e-60	Rsad2	0.842488	6.7874e-171	1.21598e-169
Ccdc3	0.698599	1.10193e-145	1.20018e-144	Gm9973	1.22177	3.80737e-60	3.78199e-59	Pebp1	1.05937	1.25823e-170	2.2352e-169
Trib1	0.746481	1.57685e-145	1.70326e-144	St14	0.769229	4.79244e-60	4.691e-59	Pik3r3	0.620122	3.39232e-170	5.97615e-169
Psme1	0.596525	2.69939e-145	2.89189e-144	Rhoc	1.0371	4.11518e-59	3.97012e-58	Tfrc	0.602005	6.37034e-170	1.11297e-168
Tax1bp3	0.51729	6.28833e-145	6.68199e-144	Parp12	0.713204	8.9247e-59	8.48796e-58	Gprc5a	0.674042	1.54728e-168	2.68111e-167
Ahr	0.678818	2.37012e-144	2.49818e-143	Srgn	1.11149	2.45041e-58	2.31408e-57	Arrdc4	0.840406	3.00891e-168	5.17142e-167
Tes	0.590604	2.9499e-144	3.08442e-143	Gsto1	1.24453	5.28383e-58	4.95497e-57	Ffar4	0.485524	1.51885e-166	2.5894e-165
Rpl13a	0.779196	3.0815e-144	3.19644e-143	Padi4	0.834015	7.64006e-58	7.11481e-57	Psme1	1.08747	3.86921e-166	6.54362e-165
Gpi1	0.645575	3.39127e-144	3.49007e-143	Wfdc17	0.948803	3.96869e-57	3.64522e-56	Hist1h4i	0.81617	7.58486e-166	1.27257e-164
Usp18	0.766546	1.08742e-143	1.11036e-142	Oasl1	1.03392	2.02261e-56	1.82035e-55	Cxcl1	1.02659	2.42451e-165	4.03576e-164
Cdcp1	0.617064	1.99405e-143	2.02033e-142	Tm4sf1	1.07706	2.87985e-56	2.55754e-55	Chchd2	0.725394	3.045e-165	5.029e-164
Phb2	0.626215	4.50619e-143	4.53045e-142	Hk2	0.810975	3.47928e-56	3.06955e-55	Tmem173	0.595977	4.11177e-165	6.73821e-164
Moxd1	0.698019	7.7633e-143	7.74552e-142	Fxyd4	1.01611	5.47426e-56	4.79803e-55	Cxcl17	1.26128	7.03977e-165	1.14478e-163
Arid5b	0.715654	9.47365e-143	9.38035e-142	C130026I21Rik	0.871146	6.16487e-56	5.36824e-55	Plk2	0.809643	1.14612e-164	1.84954e-163
Cxcl15	0.876018	5.47233e-142	5.3777e-141	Ifi35	0.709734	1.25625e-55	1.07989e-54	Oas3	0.360316	1.20996e-163	1.93777e-162
Pitpna	0.546507	3.07095e-141	2.99532e-140	Igtp	0.736712	2.76575e-55	2.36234e-54	2200002D01Rik	0.904826	4.25031e-163	6.75575e-162
Lgals3bp	0.721262	2.26792e-140	2.19568e-139	Lad1	0.642067	3.14054e-55	2.66548e-54	Tmsb4x	1.04139	1.49535e-162	2.35908e-161
Rala	0.572285	2.26598e-139	2.16178e-138	Car12	0.984265	3.3439e-55	2.82023e-54	Ifit3	0.906445	5.22275e-161	8.17845e-160
Pdlim7	0.676996	6.5808e-139	6.23269e-138	Psmb9	0.797572	9.93606e-55	8.27594e-54	C130026I21Rik	0.498435	1.06785e-160	1.65988e-159
Nme1	0.707005	1.14074e-138	1.07262e-137	Tap1	0.693952	1.63661e-54	1.35475e-53	Rps11	0.663513	1.44666e-160	2.2323e-159
Ccdc34	0.814354	1.87193e-138	1.74758e-137	Tmem173	0.704145	2.31135e-54	1.90154e-53	Ucp2	0.936185	1.41547e-159	2.15274e-158
Psme2	0.577549	1.96147e-138	1.81818e-137	Sh3bgrl3	0.75248	2.98833e-54	2.4435e-53	Parp9	0.438447	7.14446e-159	1.07881e-157
Ube2r2	0.529251	8.50593e-138	7.82905e-137	Irf9	0.658017	3.78965e-54	3.07995e-53	Mif	1.40056	3.20498e-158	4.8052e-157
Ifitm1	1.1448	1.18539e-137	1.08343e-136	Mitd1	0.634003	3.02419e-53	2.4284e-52	Npc2	1.03547	3.52767e-158	5.25175e-157
Cotl1	0.716506	6.22993e-137	5.61553e-136	Ccdc34	0.709879	3.93466e-53	3.1407e-52	Tapbp	0.980231	8.54326e-158	1.26297e-156
Uchl3	0.623143	3.23186e-136	2.8735e-135	Cdkn2a	1.00175	1.11407e-52	8.78807e-52	Capns1	1.07107	1.36452e-157	2.00319e-156
Rps8	0.61069	3.68561e-136	3.25479e-135	Ddx60	0.71837	1.51883e-52	1.19108e-51	Cxcl16	0.7797	2.07783e-156	3.02933e-155
Gclm	0.569708	1.66216e-135	1.4483e-134	Irgm1	0.671124	2.6953e-52	2.10139e-51	Gdpd1	1.15209	1.18049e-155	1.70928e-154
Pim1	0.752348	2.2869e-135	1.96643e-134	Adam10	0.676618	4.49117e-52	3.48131e-51	Ier3	1.11493	9.23191e-155	1.32764e-153
Lima1	0.558	4.14386e-135	3.53989e-134	Ucp2	0.679297	5.16078e-52	3.97736e-51	Hist1h2be	0.551739	4.03344e-154	5.76127e-153
Mmp7	1.15438	2.92893e-134	2.48578e-133	Tspo	0.734098	9.23895e-52	7.07968e-51	Gstt1	0.990216	1.58809e-153	2.25317e-152
Akr1a1	0.672209	6.68296e-134	5.63524e-133	Il33	0.789558	1.56196e-51	1.19011e-50	Barx2	0.428288	1.65817e-153	2.33691e-152
Reg3g	1.81701	1.06693e-133	8.93899e-133	Aldh1a3	0.935294	1.67957e-51	1.27249e-50	Sectm1b	0.371025	1.78773e-152	2.48636e-151
Mdfi	0.640192	4.23923e-133	3.52909e-132	Phlda3	0.766173	1.83144e-51	1.37975e-50	Rnf213	0.615749	4.83906e-151	6.68612e-150
Slc4a7	0.597909	4.63266e-133	3.83221e-132	Tcim	0.688449	5.34183e-51	3.97966e-50	Bst2	1.11889	1.43259e-149	1.96656e-148
Msrb1	0.642474	9.34049e-133	7.678e-132	Lpcat4	0.629887	1.18812e-50	8.75425e-50	Ccnd2	1.52479	3.91375e-149	5.33784e-148
Tpm2	0.603793	1.47556e-132	1.20535e-131	Ogfr	0.655967	1.72224e-50	1.26203e-49	Gpi1	1.04595	4.1505e-149	5.62445e-148
Klf6	0.798052	1.96461e-132	1.59487e-131	Sfn	0.877177	4.55405e-50	3.31901e-49	Timp2	1.20349	6.24676e-149	8.41124e-148
Itga2	0.67712	3.10098e-132	2.50184e-131	Akr1a1	0.630128	1.15826e-49	8.39582e-49	Cxadr	0.937077	2.7554e-148	3.68665e-147
Sh3glb1	0.506401	7.25572e-132	5.81793e-131	Znfx1	0.693587	1.23466e-49	8.90149e-49	Ppia	0.732966	3.76232e-148	5.00223e-147
H2afy	0.537957	9.84687e-132	7.84748e-131	Tkt	0.67804	1.62474e-49	1.16512e-48	Eif2ak2	0.50997	2.18841e-147	2.89143e-146
Jup	0.485327	3.00489e-131	2.38024e-130	Csprs	0.679984	2.38657e-49	1.70234e-48	Rpl23	0.625422	2.02356e-146	2.65702e-145
Glrx3	0.56065	4.95889e-131	3.90438e-130	Ifih1	0.720806	5.21431e-49	3.69967e-48	Rpl8	0.656388	6.90111e-146	9.00553e-145
Capn2	0.593413	5.7682e-131	4.5144e-130	Cxcl16	0.748419	1.17166e-48	8.26946e-48	S100a10	1.09956	1.01671e-145	1.3186e-144
Fermt1	0.724663	1.55552e-130	1.21016e-129	Samd9l	0.652836	1.77185e-48	1.24401e-47	Pfn1	0.893351	3.61781e-145	4.66345e-144
Ddx24	0.496196	2.37775e-130	1.83889e-129	Helz2	0.612476	2.12656e-48	1.48527e-47	Ybx1	1.04587	4.975e-145	6.37403e-144
Chmp4b	0.529139	2.77247e-130	2.13154e-129	Egln3	0.864838	2.83116e-48	1.96714e-47	Fam129a	0.342752	6.65267e-145	8.47214e-144
Ehd1	0.599523	2.37444e-129	1.81485e-128	Areg	1.05007	7.81952e-48	5.40515e-47	Ptp4a2	1.04827	2.5115e-144	3.17923e-143
Ttc9	0.768101	2.96248e-129	2.25114e-128	Capn5	0.600044	7.92988e-48	5.45332e-47	Cxcl15	0.537861	3.30994e-144	4.165e-143
Tubb5	0.959498	3.32643e-129	2.51309e-128	Uqcrq	0.611413	2.35234e-47	1.60943e-46	Cldn3	1.26808	1.23676e-142	1.54705e-141
Irf9	0.613037	4.60702e-129	3.46056e-128	Scd2	0.743729	3.53921e-47	2.40918e-46	Traf4	0.606082	3.85303e-142	4.79136e-141
Ogfr	0.60581	2.05782e-128	1.5369e-127	Dusp10	0.691333	3.66337e-47	2.4811e-46	Bsg	1.13098	4.5973e-141	5.68345e-140
Lad1	0.574561	7.62527e-128	5.66263e-127	Hist1h2bc	0.772409	5.17853e-47	3.4722e-46	Degs1	0.724004	8.53739e-141	1.04931e-139
Serpinh1	0.643918	7.74358e-128	5.718e-127	Slc40a1	0.608799	5.38444e-47	3.59231e-46	Rab15	0.926905	9.44589e-141	1.15425e-139
Krt16	1.04959	2.24862e-127	1.65109e-126	Cxcl5	1.54681	2.44092e-46	1.61245e-45	Ifit1bl1	0.617598	5.48102e-140	6.65912e-139
Cct2	0.521123	5.88694e-127	4.29845e-126	Ank2	0.668928	2.57377e-46	1.69187e-45	Trim30a	0.399875	2.1273e-139	2.56978e-138
Rab15	0.488587	2.86185e-126	2.07802e-125	Scd1	0.6515	4.07361e-46	2.66474e-45	Atp6v0c	1.00893	6.22043e-139	7.47158e-138
Rps11	0.461895	4.92985e-126	3.55984e-125	Flna	0.682118	6.65915e-46	4.33491e-45	Atp10b	0.360333	2.36065e-138	2.81944e-137
Eif4e2	0.510923	1.7592e-125	1.26334e-124	Tpm2	0.851433	7.74438e-46	5.01701e-45	Selenow	1.05916	1.83604e-137	2.18056e-136
Fxyd4	1.07936	1.84507e-125	1.31777e-124	Rtn4	0.540246	8.63986e-46	5.57022e-45	Grn	1.03083	7.76737e-137	9.17331e-136
Got2	0.480936	2.06848e-125	1.4693e-124	Znrf1	0.574162	1.14354e-45	7.33727e-45	Marcksl1	0.667466	2.08859e-136	2.45293e-135
C1qtnf12	0.527562	4.5649e-125	3.22504e-124	Iffo2	0.663557	1.32881e-45	8.48543e-45	Znfx1	0.355774	5.67502e-136	6.62817e-135
H2-Q7	0.708903	1.80313e-124	1.26704e-123	Net1	0.580051	1.44111e-45	9.15888e-45	Dstn	0.824149	7.44483e-136	8.64745e-135
Xaf1	0.510614	1.27256e-123	8.8943e-123	Ubd	1.68439	1.47198e-45	9.31094e-45	Dhrs4	0.886262	1.60626e-135	1.85554e-134
H2-T22	0.577895	1.99295e-123	1.38552e-122	H2-T23	0.644985	1.69866e-45	1.06944e-44	Dtx3l	0.481419	2.78934e-135	3.20471e-134
Nap1l1	0.525066	4.38448e-123	3.03202e-122	Trafd1	0.607787	1.94533e-45	1.21901e-44	Pfkl	0.641182	4.37786e-135	5.00259e-134
Iffo2	0.607734	1.91073e-122	1.31438e-121	Ncoa7	0.618159	4.00865e-45	2.50028e-44	Pitpna	0.893513	1.601e-134	1.81963e-133
Lrrfip1	0.534501	1.99985e-122	1.36849e-121	Plat	0.810407	4.58386e-45	2.84582e-44	Slc5a8	0.916919	4.56191e-134	5.15716e-133
Vasp	0.512303	3.28315e-122	2.23494e-121	Cttn	0.519685	4.87284e-45	3.01128e-44	Parp14	0.411378	5.76187e-134	6.47904e-133
Chic2	0.473488	1.10735e-121	7.49901e-121	Trib1	0.673483	6.53001e-45	3.99851e-44	Cd44	0.513756	8.01247e-133	8.96209e-132
Sox9	0.668863	6.32797e-121	4.26322e-120	Rap2b	0.663977	9.7646e-45	5.95197e-44	Cttn	0.745882	9.34343e-133	1.03958e-131
Plk2	0.677666	8.27163e-121	5.54411e-120	Ube2l6	0.637507	1.35503e-44	8.22212e-44	Gusb	0.666229	1.4502e-132	1.60509e-131
Timm8b	0.437223	1.75371e-120	1.16351e-119	Plac8	1.03639	1.743e-44	1.04814e-43	Slfn2	0.513018	2.32327e-132	2.55802e-131
Cdk4	0.520535	1.90231e-120	1.25571e-119	Blnk	0.608066	3.84045e-44	2.28891e-43	H2-Q4	0.58311	4.69359e-132	5.14106e-131
Pdcd6	0.487283	3.34013e-120	2.19374e-119	Ly6e	0.559853	8.17538e-44	4.8296e-43	Ano1	0.549136	1.78911e-131	1.94957e-130
Ckap4	0.509447	4.55851e-120	2.97899e-119	Rnf114	0.546629	1.16741e-43	6.86624e-43	Ly6g	0.430925	3.91857e-131	4.24813e-130
Eef1b2	0.672908	1.49844e-119	9.74362e-119	Psme1	0.680513	1.50148e-43	8.79252e-43	Bcl2l14	0.579757	4.03008e-131	4.34673e-130
Emp1	0.621536	2.72413e-119	1.76259e-118	Ccng1	0.588647	1.84756e-43	1.07254e-42	1700017B05Rik	0.453612	7.35115e-131	7.88849e-130
Kras	0.474143	4.81118e-119	3.09764e-118	Itga2	0.541504	3.90783e-43	2.25879e-42	Uqcrh	0.744997	8.70911e-131	9.29852e-130
Ndrg1	0.596785	8.49742e-119	5.44418e-118	Gabrp	0.779112	4.47712e-43	2.57675e-42	Cystm1	0.757466	9.80944e-131	1.04207e-129
1110008P14Rik	0.462293	1.53507e-118	9.78703e-118	Slc39a8	0.800473	5.3671e-43	3.06267e-42	Ifit3b	0.549934	4.80569e-130	5.07961e-129
Pon2	0.433657	2.12086e-118	1.34562e-117	Desi1	0.534104	1.29015e-42	7.33092e-42	Tax1bp3	0.862103	2.30732e-129	2.4267e-128
Pdlim5	0.465189	2.62526e-118	1.65759e-117	Uqcc2	0.518289	1.45944e-42	8.25783e-42	Cd81	1.17433	2.01112e-128	2.1047e-127
Mitd1	0.536148	3.55859e-118	2.2361e-117	rtTA-eGFP	0.534509	2.36558e-42	1.33287e-41	Rpl22	0.717741	5.97385e-128	6.22104e-127
Reep3	0.435024	6.67805e-118	4.17618e-117	H2afj	0.661336	2.67759e-42	1.50236e-41	Clic1	1.09319	6.69634e-128	6.93924e-127
Plpp2	0.473965	3.31579e-117	2.06369e-116	Rpl13a	0.642927	3.61559e-42	2.02021e-41	Gm7714	2.75025	6.91944e-128	7.13546e-127
Ifngr2	0.518051	5.13591e-117	3.18135e-116	Apobr	0.552858	4.50171e-42	2.50489e-41	Eef1b2	0.890854	1.16605e-127	1.19662e-126
Eno1	0.494592	9.72654e-117	5.9965e-116	Spint1	0.538001	4.91944e-42	2.72602e-41	Atp5mpl	0.923108	2.9679e-127	3.03098e-126
Scd2	0.598701	1.44889e-116	8.89061e-116	Gda	0.554953	9.47494e-42	5.18608e-41	Btg2	1.24298	1.62484e-126	1.6514e-125
Ndufa8	0.399015	2.65083e-116	1.61899e-115	Oxct1	0.585454	2.32556e-41	1.25749e-40	Pygb	1.03478	3.08131e-126	3.11669e-125
Tmem147	0.460224	3.92772e-116	2.38769e-115	Isg20	0.630415	4.76597e-41	2.56673e-40	Urah	0.888693	1.02749e-125	1.03434e-124
Eif4b	0.414489	4.84101e-116	2.92926e-115	Cxcl1	1.12297	4.83139e-41	2.59156e-40	Rps9	0.576523	1.32984e-125	1.33237e-124
Klf7	0.533808	6.8096e-116	4.10145e-115	Cd164	0.567237	5.55766e-41	2.96587e-40	Cox5a	0.951394	4.34434e-125	4.33204e-124
Cyth2	0.444823	6.92982e-116	4.15471e-115	Tjp3	0.608594	5.57345e-41	2.96587e-40	Glul	1.08591	3.05026e-124	3.02735e-123
Rpl29	0.46686	1.80954e-115	1.07994e-114	Rbms1	0.494977	8.40085e-41	4.45278e-40	Akr1a1	0.899326	9.88007e-124	9.76003e-123
Avpi1	0.466118	2.04868e-115	1.2171e-114	Car2	0.756531	4.22561e-40	2.23092e-39	Cdh1	1.40321	1.19567e-123	1.17565e-122
Nono	0.466035	2.08508e-115	1.23312e-114	Arf3	0.514786	4.24607e-40	2.23293e-39	Myl6	0.776623	1.6431e-123	1.6081e-122
Ap2m1	0.432189	4.48224e-115	2.63887e-114	Pik3r3	0.545063	4.28771e-40	2.24602e-39	Xaf1	0.601986	2.05701e-123	2.00393e-122
Akirin1	0.456608	7.35175e-115	4.30885e-114	Il1rn	0.605306	4.90004e-40	2.55679e-39	Clmn	0.380537	6.27238e-123	6.08248e-122
Pebp1	0.632166	8.0605e-115	4.70316e-114	Ifngr2	0.49802	6.20698e-40	3.22619e-39	Bcl3	0.386241	4.3635e-122	4.19293e-121
Emc10	0.40902	1.3602e-114	7.90127e-114	Tpd52	0.582638	6.38929e-40	3.30812e-39	Tmem176b	1.35286	9.84059e-121	9.41313e-120
Taf10	0.403009	1.456e-114	8.42031e-114	Trp53inp1	0.520555	7.32326e-40	3.77711e-39	Ccser2	0.591927	6.12686e-120	5.83432e-119
Rab25	0.512332	2.83027e-114	1.62959e-113	Stap2	0.646958	8.16967e-40	4.19752e-39	Plac8	1.19815	1.04759e-119	9.93097e-119
Erp29	0.439994	3.22456e-114	1.84847e-113	Hsp90ab1	0.415816	1.32918e-39	6.80316e-39	Rpl41	0.420291	1.05512e-119	9.95772e-119
Tnip3	0.731429	7.45279e-114	4.25362e-113	Tubb5	0.58261	1.60125e-39	8.16455e-39	Exoc4	0.569576	1.31783e-119	1.23818e-118
Arpc4	0.403893	8.44979e-114	4.80168e-113	Gbp3	0.567691	2.1141e-39	1.07387e-38	Egln3	0.409869	3.0156e-118	2.82079e-117
Denr	0.506635	1.01473e-113	5.74134e-113	Gm14137	0.486783	2.52851e-39	1.27952e-38	Anxa2	1.14705	3.34211e-118	3.11243e-117
Apol9a	0.590128	1.33654e-113	7.52957e-113	Creb5	0.555613	3.47009e-39	1.74939e-38	Tcim	0.500605	6.72854e-118	6.23866e-117
Crip1	0.842285	2.38457e-113	1.33761e-112	Rhov	0.589605	4.46057e-39	2.24031e-38	Plscr1	0.903374	2.24853e-117	2.07572e-116
Lgals9	0.540365	3.17494e-113	1.77335e-112	Acp5	0.508847	6.60815e-39	3.30654e-38	Ddx58	0.368986	2.50889e-117	2.30599e-116
Mrpl14	0.373351	2.25661e-112	1.25506e-111	Herc6	0.556924	6.84107e-39	3.41036e-38	Insig2	0.765212	3.25741e-117	2.98103e-116
2200002D01Rik	0.586389	2.70882e-112	1.50018e-111	Irgm2	0.465762	7.72412e-39	3.83632e-38	Ptma	0.771893	2.14368e-116	1.94496e-115
Ostc	0.445622	3.66631e-112	2.02188e-111	Capg	0.632321	1.0272e-38	5.08293e-38	Dynll2	0.820941	2.36711e-116	2.13849e-115
Sox4	0.609991	4.34163e-112	2.38425e-111	Cmpk2	0.805177	1.39064e-38	6.85607e-38	Cox6b1	0.771854	2.53904e-116	2.28406e-115
Clic1	0.597467	5.03112e-112	2.75133e-111	Tor3a	0.52236	1.6979e-38	8.34024e-38	Eno1	0.733372	2.6776e-116	2.3985e-115
Cavin3	0.740085	5.06758e-112	2.75972e-111	Efhd2	0.447355	2.78327e-38	1.36218e-37	Elf3	0.783814	2.93814e-116	2.62077e-115
Map2k2	0.349926	5.2847e-112	2.86602e-111	Pdlim7	0.546629	3.25773e-38	1.58859e-37	Tgfbr2	0.600059	3.40148e-116	3.02132e-115
Hif1a	0.43549	1.21789e-111	6.57761e-111	Ramp1	0.640262	5.84282e-38	2.83885e-37	Rhoc	0.822041	5.50633e-116	4.87045e-115
Ostf1	0.410171	1.52211e-111	8.18681e-111	Ppa1	0.546758	6.97577e-38	3.37708e-37	Lad1	0.391065	8.05398e-116	7.09422e-115
Arhgdia	0.358174	1.92062e-111	1.02879e-110	Tsc22d4	0.500299	1.18827e-37	5.7319e-37	Arl6ip1	0.811672	1.51548e-115	1.32935e-114
Gch1	0.522221	2.55214e-111	1.36149e-110	Slfn5	0.432089	1.30426e-37	6.26888e-37	Prdx2	0.96619	1.65512e-115	1.44584e-114
Atp6v1g1	0.377456	4.45549e-111	2.36721e-110	Erp29	0.493772	1.33232e-37	6.38084e-37	Phf11d	0.435625	2.84827e-115	2.47788e-114
Psma7	0.514057	7.87106e-111	4.16497e-110	Gpi1	0.550911	1.48539e-37	7.08865e-37	Hsd11b2	0.455157	7.38447e-115	6.39785e-114
Fkbp8	0.325564	1.1096e-110	5.84776e-110	Bnip3	0.719494	2.37432e-37	1.12907e-36	Efnb2	0.322527	2.99659e-114	2.58563e-113
Akap13	0.463351	1.14727e-110	6.02203e-110	Cd74	1.03366	2.82646e-37	1.33932e-36	Atp5a1	0.940033	3.45459e-114	2.9687e-113
Cacybp	0.398323	2.65579e-110	1.38845e-109	St3gal4	0.55319	3.17971e-37	1.50141e-36	Arpc2	0.967785	3.55828e-114	3.04543e-113
Cmpk1	0.545627	3.21455e-110	1.67387e-109	Tpm1	0.570849	4.05293e-37	1.90701e-36	Bzw2	0.975922	7.67829e-114	6.54512e-113
Atp5c1	0.492683	4.23401e-110	2.19597e-109	Pip5k1a	0.444804	4.79238e-37	2.24706e-36	Tnfrsf12a	1.08392	1.03573e-113	8.79327e-113
Smox	0.504015	4.46864e-110	2.3085e-109	Gusb	0.482367	4.87278e-37	2.2768e-36	Nhp2	0.883756	1.04156e-113	8.8074e-113
Phf20l1	0.441226	5.54224e-110	2.85185e-109	Aebp2	0.42378	5.26864e-37	2.45321e-36	Lima1	1.00337	1.54434e-113	1.30069e-112
Rab10	0.430149	9.65979e-110	4.95112e-109	Krtcap3	0.470859	6.48086e-37	2.98654e-36	Phlda3	0.456622	2.34662e-113	1.96856e-112
Tgif1	0.454026	1.32482e-109	6.76384e-109	Sox9	0.631177	8.91161e-37	4.09263e-36	Rps3a1	0.581991	5.624e-113	4.69926e-112
Epcam	0.673272	2.16937e-109	1.10326e-108	Lap3	0.53046	1.36734e-36	6.25803e-36	Got2	0.581005	5.69405e-113	4.73907e-112
Cct4	0.456618	2.82832e-109	1.4328e-108	Ecscr	0.532007	1.432e-36	6.5317e-36	Rhov	0.387101	8.43591e-113	6.99353e-112
Larp4b	0.420305	2.93547e-109	1.48134e-108	Tmc4	0.546031	1.57448e-36	7.1572e-36	Net1	0.371333	1.09145e-112	9.01299e-112
Bhlhe40	0.542097	7.21377e-109	3.6263e-108	Coro1c	0.424284	1.64978e-36	7.47419e-36	Sh3bgrl3	0.985583	3.88029e-112	3.17944e-111
Ctsb	0.459144	8.74597e-109	4.37969e-108	Rras	0.455044	1.66882e-36	7.53498e-36	Flnb	0.442252	4.4076e-112	3.59756e-111
Taldo1	0.535326	9.37656e-109	4.67754e-108	Fndc3a	0.506044	1.8089e-36	8.14003e-36	Tmem176a	1.33069	1.50273e-111	1.22183e-110
Bax	0.426066	2.74119e-108	1.36226e-107	Lamtor1	0.435852	2.2533e-36	1.01059e-35	Zfand5	1.12895	1.70921e-111	1.3844e-110
Phf5a	0.381901	2.9365e-108	1.45379e-107	Sh3kbp1	0.448074	3.70183e-36	1.65472e-35	Pomp	0.877517	9.1379e-111	7.3731e-110
Adss	0.375243	3.12468e-108	1.54112e-107	Ctss	0.552288	4.3215e-36	1.92529e-35	Lbp	0.373036	1.0779e-110	8.6642e-110
Ndufa10	0.409216	5.68922e-108	2.79542e-107	Sbsn	0.54709	4.86951e-36	2.16226e-35	Mal2	0.543168	1.38403e-110	1.10827e-109
Ssu72	0.403504	5.73256e-108	2.80616e-107	Nampt	0.503171	5.14234e-36	2.26094e-35	Krt18	0.733397	1.79345e-110	1.42532e-109
Ripk4	0.483403	9.38395e-108	4.57643e-107	Actr2	0.408876	6.09281e-36	2.66139e-35	Rps15	0.591898	1.8038e-110	1.42818e-109
Lsr	0.367046	1.1532e-107	5.58515e-107	Krt17	1.01607	6.13799e-36	2.67242e-35	Dapl1	0.544594	1.91362e-110	1.50948e-109
Mlf2	0.346826	1.15378e-107	5.58515e-107	Rab15	0.495836	6.38735e-36	2.77199e-35	Epcam	1.07249	1.98325e-110	1.55859e-109
Ergic3	0.335731	1.40944e-107	6.79757e-107	Aldoa	0.57563	6.4698e-36	2.79871e-35	Ddx24	0.713917	4.29527e-110	3.36304e-109
Nxn	0.462458	2.05971e-107	9.89721e-107	Calm3	0.478887	7.4938e-36	3.23125e-35	Bnip3	0.932193	1.1175e-109	8.71734e-109
Rab11a	0.379492	2.38308e-107	1.14091e-106	Tbc1d1	0.39642	8.12314e-36	3.49139e-35	H3f3b	0.686885	1.85309e-109	1.44024e-108
Hdgf	0.438994	2.95354e-107	1.40886e-106	Carhsp1	0.478142	9.37447e-36	4.01635e-35	Rhou	0.917466	3.16217e-109	2.44865e-108
Sprr2a3	1.06873	4.04945e-107	1.92459e-106	Tmsb10	0.725562	1.15138e-35	4.91721e-35	Parm1	0.623436	3.71938e-109	2.86962e-108
Hist1h2bc	0.631547	7.24617e-107	3.43143e-106	Map4k4	0.376708	1.2025e-35	5.11922e-35	Iqgap1	0.636048	1.09464e-108	8.41479e-108
Eif2ak2	0.448788	1.10545e-106	5.21599e-106	Apol7a	0.466919	1.37112e-35	5.81859e-35	Lgmn	0.52507	1.23337e-108	9.41279e-108
Wdr1	0.366057	1.5149e-106	7.12221e-106	Rps8	0.522545	4.36791e-35	1.83043e-34	Slc25a5	0.929801	1.27796e-108	9.71798e-108
Rps9	0.439367	2.01027e-106	9.4173e-106	Insig2	0.449964	5.62561e-35	2.35014e-34	Il13ra1	0.352432	1.73012e-108	1.31093e-107
Spint1	0.526108	7.31432e-106	3.40207e-105	Gsr	0.466623	8.53664e-35	3.55517e-34	Cct2	0.790086	2.41017e-108	1.81968e-107
Metap2	0.408126	7.40886e-106	3.43382e-105	Slpi	0.876878	1.02781e-34	4.26716e-34	Gmpr	0.863992	1.03985e-107	7.82296e-107
Sh3bgrl3	0.685352	8.18503e-106	3.78015e-105	Elf3	0.592109	1.42001e-34	5.87726e-34	Tuft1	0.651581	1.12e-107	8.39603e-107
Lrrfip2	0.422773	9.43151e-106	4.32526e-105	Ero1l	0.675897	3.36591e-34	1.38457e-33	Trim25	0.443441	1.63957e-107	1.22476e-106
Ptbp3	0.341144	1.1322e-105	5.17407e-105	Rfk	0.415732	6.96085e-34	2.85459e-33	Cyb5r3	0.87955	1.68713e-107	1.25585e-106
Ptprf	0.328419	1.74395e-105	7.94197e-105	Bspry	0.356276	7.64793e-34	3.12679e-33	Endod1	0.417052	1.80661e-107	1.34006e-106
Sf3b6	0.387975	2.84045e-105	1.28905e-104	Nfkb1	0.464855	1.04142e-33	4.2448e-33	Krt23	0.795709	1.98052e-107	1.46392e-106
Tkt	0.484209	2.88448e-105	1.3045e-104	Ddx24	0.392007	1.24003e-33	5.02381e-33	St14	0.580999	2.02066e-107	1.48839e-106
Alcam	0.498238	8.62292e-105	3.87291e-104	Olfr1033	0.644599	1.43534e-33	5.79755e-33	Ehd4	0.662415	2.24921e-107	1.65099e-106
Ier5	0.443922	2.6638e-104	1.19232e-103	Ccdc12	0.468191	1.62118e-33	6.52854e-33	Abcc3	0.53149	3.64804e-107	2.6685e-106
Actr2	0.335745	2.79979e-104	1.24892e-103	Gm7609	0.530463	2.16744e-33	8.70223e-33	Hras	0.6136	5.09542e-107	3.71439e-106
Arpc5	0.427874	2.89606e-104	1.28747e-103	Psmd8	0.443708	3.68138e-33	1.47365e-32	S100a6	0.831927	6.26027e-107	4.54784e-106
Car2	0.829546	3.78357e-104	1.67632e-103	Csnk1e	0.378962	4.52448e-33	1.80039e-32	Csta1	1.31858	1.03539e-106	7.49591e-106
Vps36	0.430094	4.39216e-104	1.93937e-103	Nenf	0.444993	4.56947e-33	1.81292e-32	Eef2	0.636061	2.11619e-106	1.52164e-105
Cast	0.366804	4.65057e-104	2.04657e-103	Cast	0.399982	4.84299e-33	1.91577e-32	H2afy	0.620039	4.41167e-106	3.16145e-105
Ppp1r2	0.382124	5.49628e-104	2.41062e-103	Dhx58	0.457968	5.29155e-33	2.08705e-32	Sppl2a	0.664021	5.45597e-106	3.89659e-105
Nedd9	0.558134	9.89937e-104	4.32725e-103	Pfkl	0.407712	6.87046e-33	2.70184e-32	Hist1h4h	0.517819	8.37623e-106	5.96207e-105
F3	0.796758	4.9038e-103	2.13642e-102	M6pr	0.384209	6.97231e-33	2.73388e-32	Tes	0.780809	1.24849e-105	8.8567e-105
Ahnak2	0.527757	6.18784e-103	2.68688e-102	Tnk2	0.426355	7.98237e-33	3.1208e-32	Dnajc5	0.719219	2.25119e-105	1.59164e-104
Il13ra1	0.525127	7.3206e-103	3.16822e-102	Timm8b	0.427159	9.52009e-33	3.71117e-32	Ifih1	0.344139	3.72247e-105	2.6231e-104
Bex3	0.506951	8.95662e-103	3.86347e-102	Map2k1	0.410838	1.00453e-32	3.90455e-32	N4bp1	0.404646	4.4677e-105	3.13778e-104
Ggct	0.657266	2.56768e-102	1.10393e-101	Ttbk2	0.442347	1.44518e-32	5.60112e-32	Rras	0.37967	5.20621e-105	3.64435e-104
Mafg	0.349808	3.00024e-102	1.28568e-101	Mast4	0.41934	1.5087e-32	5.83044e-32	Plekhb2	0.60549	6.87103e-105	4.79385e-104
Znhit1	0.396046	4.97289e-102	2.12404e-101	Prrg4	0.420502	1.5153e-32	5.83914e-32	Ubc	0.919908	7.30565e-105	5.08031e-104
Uqcrfs1	0.383107	5.35362e-102	2.27921e-101	Bhlhe40	0.479169	1.56752e-32	6.02304e-32	Jund	1.00544	8.67365e-105	6.01183e-104
Sys1	0.369063	6.63437e-102	2.8153e-101	Pdgfa	0.457942	2.13892e-32	8.17179e-32	Gde1	0.462253	1.37207e-104	9.47892e-104
Dag1	0.407351	8.71605e-102	3.68669e-101	Exoc4	0.520159	2.43983e-32	9.29493e-32	Ran	0.877285	1.39208e-104	9.58586e-104
Lman2	0.323764	1.12828e-101	4.75695e-101	1700017B05Rik	0.418122	2.80902e-32	1.0641e-31	Ier5	0.441335	2.95793e-104	2.03021e-103
Arl4c	0.509465	1.19969e-101	5.04176e-101	Cd14	0.516909	2.92791e-32	1.10601e-31	Grip2	0.76246	3.06148e-104	2.09449e-103
Banf1	0.431784	1.46532e-101	6.13838e-101	Nectin2	0.378636	3.11375e-32	1.1729e-31	Cd2ap	0.884529	5.80757e-104	3.96038e-103
Igfbp4	0.688129	1.55234e-101	6.48212e-101	Dsg2	0.401284	3.52312e-32	1.32339e-31	Ero1l	0.463214	7.37351e-104	5.01209e-103
Anxa8	0.643016	1.76882e-101	7.36257e-101	Vasp	0.431687	3.7197e-32	1.38945e-31	Gns	0.569682	1.4026e-103	9.5035e-103
Plaur	0.619539	1.77754e-101	7.37539e-101	Cyp51	0.488262	4.88741e-32	1.82056e-31	Lasp1	0.746051	1.82657e-103	1.23366e-102
Med21	0.397457	2.48479e-101	1.02773e-100	Kras	0.439517	5.39672e-32	2.00471e-31	Pfn2	0.514178	4.8736e-103	3.28115e-102
Krt4	1.03591	2.73598e-101	1.12805e-100	Gbp2	0.479865	6.01648e-32	2.22876e-31	Rhpn2	0.669797	1.01235e-102	6.79396e-102
Nhp2	0.473499	3.73074e-101	1.53336e-100	Sppl2a	0.452122	6.63636e-32	2.45161e-31	Parp12	0.330957	1.64522e-102	1.10063e-101
Fkbp4	0.406577	5.25295e-101	2.15223e-100	Traf4	0.361114	6.84225e-32	2.52073e-31	Nfe2l1	0.741904	2.96501e-102	1.9773e-101
Mrpl36	0.413032	1.25786e-100	5.13758e-100	Samhd1	0.483602	7.45654e-32	2.73951e-31	Tspan8	0.77873	5.44442e-102	3.61934e-101
Dsp	0.369217	1.49195e-100	6.07471e-100	Mrpl33	0.41904	7.76475e-32	2.84495e-31	Bspry	0.573895	6.3937e-102	4.23708e-101
Cyb5a	0.337537	2.44406e-100	9.92045e-100	Caprin1	0.349215	9.72771e-32	3.55446e-31	Fxyd4	0.785941	7.78968e-102	5.14606e-101
Mapk3	0.379928	6.89819e-100	2.78269e-99	Eno1	0.459908	9.80657e-32	3.57353e-31	Ank2	0.756896	2.91664e-101	1.92081e-100
Sf3b5	0.377058	9.49327e-100	3.81776e-99	Tnfsf10	0.388648	1.0252e-31	3.72574e-31	Atf3	0.982093	3.36806e-101	2.21121e-100
H2-T23	0.509453	1.15734e-99	4.6258e-99	Plxnb2	0.46013	1.07659e-31	3.90192e-31	Prdx5	0.836559	5.41974e-101	3.54716e-100
Pvr	0.444328	3.06508e-99	1.22136e-98	Tnf	0.569284	1.21902e-31	4.40622e-31	Gchfr	0.939264	9.34483e-101	6.09721e-100
Ccser2	0.373486	4.74433e-99	1.87336e-98	Litaf	0.419166	1.34754e-31	4.85768e-31	Sp100	0.392024	1.67733e-100	1.09104e-99
Bri3	0.357793	5.2334e-99	2.06026e-98	Ptgfrn	0.351769	1.36028e-31	4.89045e-31	Atp5j2	0.770438	2.30994e-100	1.49792e-99
Mrpl57	0.387126	6.21081e-99	2.4377e-98	Hmox1	0.911882	1.64651e-31	5.90366e-31	Vdac2	0.801518	2.56144e-100	1.65593e-99
Ssr4	0.516486	6.45113e-99	2.52444e-98	Daxx	0.451192	1.83091e-31	6.54734e-31	Ccdc34	0.493188	4.95732e-100	3.19505e-99
Timm13	0.414981	7.91896e-99	3.08484e-98	Abcd3	0.378582	2.05034e-31	7.31253e-31	Stat1	0.411852	1.82132e-99	1.17029e-98
Ifi35	0.443117	7.93044e-99	3.08484e-98	Eif6	0.374332	2.21395e-31	7.8751e-31	Rpl29	0.519145	1.93369e-99	1.23874e-98
Fkbp1a	0.422632	9.69235e-99	3.75902e-98	Baz1a	0.365667	2.24943e-31	7.98013e-31	H2afj	0.748907	1.971e-99	1.25882e-98
Gnb2	0.498541	9.75172e-99	3.77086e-98	Grina	0.430329	2.40015e-31	8.48675e-31	Plaur	0.452282	1.99413e-99	1.26976e-98
Ssr2	0.354558	1.19767e-98	4.61758e-98	Znhit1	0.350239	2.4049e-31	8.48675e-31	Capn2	0.337965	2.58725e-99	1.64247e-98
Etfa	0.350872	1.58629e-98	6.09789e-98	Ptp4a2	0.426745	3.37441e-31	1.18458e-30	Blnk	0.688284	5.37879e-99	3.40442e-98
Snx3	0.324433	2.17173e-98	8.32392e-98	Rala	0.406889	4.59768e-31	1.6056e-30	Clstn1	0.641225	6.37736e-99	4.0244e-98
Ndufv2	0.346794	2.22984e-98	8.52165e-98	Prelid1	0.422078	5.51695e-31	1.92162e-30	Cs	0.54499	7.73626e-99	4.85295e-98
Npc2	0.495377	2.60565e-98	9.92882e-98	Adamts1	0.694195	5.69021e-31	1.97683e-30	Aplp2	0.712517	1.45259e-98	9.08512e-98
Cstb	0.672953	3.19408e-98	1.21356e-97	Pxdc1	0.485741	6.12192e-31	2.12132e-30	Mbd2	0.437752	2.34617e-98	1.46307e-97
Txnl1	0.354656	4.09624e-98	1.55182e-97	Cda	0.4533	6.61169e-31	2.28512e-30	Hdgf	0.816988	3.2792e-98	2.03889e-97
Dusp1	0.5364	5.22079e-98	1.97213e-97	Tfap2a	0.436032	7.18191e-31	2.47582e-30	Rps5	0.459328	3.92313e-98	2.43211e-97
Atp6v0e	0.38148	7.5069e-98	2.82753e-97	Gipc1	0.369179	8.48715e-31	2.91828e-30	Rpl39	0.416386	7.03063e-98	4.34583e-97
Ppp2ca	0.329277	9.56646e-98	3.58263e-97	Pgd	0.335934	8.72978e-31	2.99402e-30	Spns2	0.347172	1.58289e-97	9.72741e-97
Eif3m	0.361001	1.11135e-97	4.13829e-97	Ptprj	0.395824	9.3025e-31	3.18231e-30	Irf6	0.685268	1.93063e-97	1.183e-96
Txndc17	0.416074	1.83078e-97	6.7978e-97	Nfkbiz	0.56746	9.66282e-31	3.29716e-30	Naca	0.614381	1.98974e-97	1.2157e-96
Selenom	0.422198	2.67163e-97	9.89183e-97	Rdh10	0.393708	1.0133e-30	3.44883e-30	Cd164	1.03026	2.82872e-97	1.72332e-96
Mtch2	0.329345	3.12957e-97	1.15547e-96	Tspan14	0.369775	1.04141e-30	3.53552e-30	Rnf114	0.520725	3.06537e-97	1.86212e-96
Mrpl51	0.330698	3.18819e-97	1.17379e-96	Lgals7	1.42069	1.30719e-30	4.41546e-30	Prr15l	0.642868	3.4635e-97	2.09795e-96
Cks2	0.492195	4.47653e-97	1.64349e-96	Enah	0.457842	1.39801e-30	4.71039e-30	Taldo1	0.871359	3.91898e-97	2.36707e-96
Cttn	0.343983	5.79117e-97	2.12019e-96	Ap2s1	0.41213	1.42421e-30	4.78661e-30	Tor3a	0.500393	4.7843e-97	2.88148e-96
Slc39a8	0.713314	7.12812e-97	2.60236e-96	Zfand2a	0.37244	1.53988e-30	5.14957e-30	Rin2	0.439344	6.12626e-97	3.67924e-96
Map4k4	0.382429	1.14292e-96	4.14944e-96	Trim30d	0.396049	1.54437e-30	5.15175e-30	H2-T23	0.609237	7.44273e-97	4.4572e-96
Pmaip1	0.558185	3.99362e-96	1.44589e-95	Sh3glb1	0.382539	1.68453e-30	5.60534e-30	Rplp1	0.438748	9.32781e-97	5.57034e-96
Tuft1	0.445654	4.33e-96	1.56334e-95	Ecm1	0.5432	1.76221e-30	5.84933e-30	Nectin2	0.471476	9.90519e-97	5.89847e-96
Mmp15	0.467196	5.10433e-96	1.83784e-95	Pomp	0.464856	1.80861e-30	5.98852e-30	Chmp2b	0.740607	1.02622e-96	6.09392e-96
Trappc4	0.37845	6.4841e-96	2.32822e-95	Dnase2a	0.372666	2.94678e-30	9.70915e-30	Mitd1	0.522801	1.148e-96	6.79798e-96
Ccm2	0.367064	7.92754e-96	2.83871e-95	Vcpkmt	0.357269	3.19511e-30	1.05016e-29	Chchd10	0.868611	1.23601e-96	7.29867e-96
Tpd52	0.361015	1.78023e-95	6.33995e-95	BC064078	0.423717	3.60671e-30	1.18254e-29	Dynll1	0.75328	1.28541e-96	7.56924e-96
Otud7b	0.391105	3.0968e-95	1.09689e-94	Ifi202b	0.751043	4.08133e-30	1.33489e-29	Hexa	0.792771	1.8728e-96	1.09975e-95
Plet1	0.665646	6.81754e-95	2.40176e-94	Cd47	0.563824	4.4583e-30	1.45464e-29	Zfp36l1	1.15123	2.49269e-96	1.45971e-95
Smim15	0.434374	7.53891e-95	2.64875e-94	Bak1	0.334924	5.99562e-30	1.94676e-29	Arpc3	0.756771	4.21178e-96	2.45958e-95
Mrps12	0.338885	1.22589e-94	4.29554e-94	Cox5a	0.474066	6.52917e-30	2.11488e-29	Trip12	0.480731	9.62664e-96	5.59086e-95
Atp5f1	0.428869	1.62047e-94	5.66297e-94	G6pdx	0.384389	6.76172e-30	2.18493e-29	Rpl26	0.416314	1.378e-95	7.97926e-95
Rcc2	0.338897	2.41336e-94	8.41137e-94	Ehd1	0.357389	1.17005e-29	3.75367e-29	Chmp4c	0.446678	1.38146e-95	7.97926e-95
Map2k4	0.396025	3.21132e-94	1.11628e-93	Pik3c2a	0.366022	1.34453e-29	4.30315e-29	Irf1	0.449586	1.40416e-95	8.08824e-95
Gsr	0.39631	6.5197e-94	2.26028e-93	Apbb2	0.399667	2.22358e-29	7.06592e-29	Paqr8	0.382636	2.57283e-95	1.47798e-94
Irgm1	0.445492	9.75077e-94	3.3715e-93	Ffar4	0.45553	2.60175e-29	8.24809e-29	Gtf2h5	0.796496	2.87881e-95	1.64927e-94
Fat1	0.365465	1.64052e-93	5.62771e-93	Meis2	0.460535	7.27104e-29	2.28884e-28	Dhrs3	0.631282	4.67911e-95	2.67342e-94
Bcar1	0.418877	1.68801e-93	5.77547e-93	Hspa1b	0.609389	7.37413e-29	2.31586e-28	Myl12a	0.855935	1.02259e-94	5.82686e-94
Spint2	0.572449	1.8948e-93	6.46608e-93	Eml4	0.340522	7.93549e-29	2.48053e-28	Slc43a2	0.350442	1.51465e-94	8.60743e-94
Prdx2	0.43225	3.74019e-93	1.27303e-92	Pml	0.412004	8.03914e-29	2.50709e-28	Rps2	0.567153	2.71376e-94	1.53804e-93
Cdc42ep5	0.39207	4.26251e-93	1.44704e-92	Sntb2	0.407831	8.72653e-29	2.71515e-28	Ap2s1	0.786902	4.26699e-94	2.40544e-93
Nudt21	0.346632	4.5745e-93	1.54893e-92	C77080	0.350742	1.02609e-28	3.18514e-28	Bicdl2	0.497814	7.1479e-94	4.00813e-93
Clta	0.449737	6.10324e-93	2.06122e-92	Naa20	0.371676	1.03672e-28	3.21071e-28	Cox7a2	0.706093	7.77398e-94	4.34767e-93
Rbp1	0.766003	6.42727e-93	2.16506e-92	Trp53inp2	0.333039	1.08923e-28	3.36557e-28	Tsc22d4	0.541435	1.19546e-93	6.66809e-93
rtTA-eGFP	0.559247	6.71043e-93	2.25464e-92	Atp6v1a	0.351958	1.12955e-28	3.48212e-28	Cox8a	0.552816	1.25637e-93	6.98938e-93
Rnf213	0.474219	1.21868e-92	4.07371e-92	Ier3	0.502593	1.538e-28	4.73041e-28	Cd55	0.324182	1.4683e-93	8.14695e-93
Chmp3	0.381432	1.28631e-92	4.28878e-92	Gnai2	0.400475	1.81791e-28	5.57853e-28	Itm2b	0.662735	1.61484e-93	8.93658e-93
Sdc1	0.461689	1.43245e-92	4.76392e-92	Mx1	0.475689	2.00878e-28	6.15018e-28	Vill	0.331975	1.99921e-93	1.10348e-92
Anxa2	0.494925	1.94762e-92	6.4444e-92	Tap2	0.436551	2.30587e-28	7.04366e-28	Gm10800	0.493607	2.34262e-93	1.28966e-92
0610012G03Rik	0.340024	2.72364e-92	8.94422e-92	Ube2i	0.415763	2.3396e-28	7.13046e-28	Jpt1	0.764438	3.36772e-93	1.84918e-92
Nt5c	0.325432	2.73242e-92	8.95055e-92	Fam214b	0.350582	2.39017e-28	7.26806e-28	Atp5d	0.731585	6.72977e-93	3.68568e-92
Krt15	0.859446	3.69174e-92	1.20327e-91	Mrpl34	0.367895	3.04999e-28	9.25348e-28	Rpl13a	0.821268	7.3289e-93	4.00344e-92
Mdh2	0.34017	4.89569e-92	1.59171e-91	Ube2l3	0.390301	3.18216e-28	9.63269e-28	Ppp1cb	0.820567	7.85994e-93	4.28245e-92
Ext1	0.390401	8.36615e-92	2.70657e-91	Larp4b	0.348657	3.70308e-28	1.11843e-27	C77080	0.340029	9.30721e-93	5.05795e-92
Snrpe	0.496194	8.56652e-92	2.76455e-91	Mindy2	0.326917	3.89574e-28	1.17134e-27	Tfcp2l1	0.518959	2.22279e-92	1.20312e-91
Tmcc3	0.529846	1.20329e-91	3.86413e-91	Ltbp1	0.497041	5.20553e-28	1.56166e-27	Ywhah	0.837778	2.22526e-92	1.20312e-91
Smc4	0.479127	1.34332e-91	4.30323e-91	Clip4	0.365527	6.1941e-28	1.84995e-27	Atp5k	0.805927	3.53079e-92	1.90411e-91
BC064078	0.328388	1.38018e-91	4.41049e-91	Bok	0.390815	6.75848e-28	2.01403e-27	Spint1	0.516022	3.67564e-92	1.97717e-91
Gja1	0.350189	1.87234e-91	5.95412e-91	Osbpl3	0.405813	9.62079e-28	2.86064e-27	Ywhab	0.617066	8.51698e-92	4.56977e-91
Ran	0.572076	1.95465e-91	6.20078e-91	Phf5a	0.324738	1.2697e-27	3.76147e-27	Txn1	0.77404	1.52397e-91	8.13555e-91
Cdkn2a	0.599895	2.37092e-91	7.50312e-91	Rack1	0.408376	2.3076e-27	6.77131e-27	Arf3	0.540708	1.61047e-91	8.57565e-91
Nisch	0.344629	3.0283e-91	9.53732e-91	0610040J01Rik	0.348904	2.37585e-27	6.94135e-27	Gnai2	0.777837	1.62589e-91	8.636e-91
Ahnak	0.412648	3.79078e-91	1.1853e-90	Serpinb5	0.396711	2.81548e-27	8.20775e-27	Filip1l	0.542802	2.35458e-91	1.24751e-90
Syngr2	0.397178	5.00248e-91	1.56044e-90	Lpin2	0.367135	2.96949e-27	8.63794e-27	Tpm1	0.666701	2.72046e-91	1.43776e-90
Lamc2	0.419633	5.93661e-91	1.84303e-90	Cd151	0.351833	3.00604e-27	8.72532e-27	Litaf	0.622027	2.80298e-91	1.47768e-90
Dsc3	0.4681	7.09037e-91	2.19081e-90	Ugt2b34	0.689206	3.0679e-27	8.88565e-27	Ifi35	0.523795	5.89893e-91	3.10207e-90
Srp72	0.358954	7.48221e-91	2.30643e-90	Clasp1	0.340752	3.26389e-27	9.43291e-27	Serinc2	0.621006	1.0605e-90	5.56302e-90
Mlec	0.386208	1.38662e-90	4.26426e-90	Dcp2	0.343926	3.44417e-27	9.91123e-27	Aak1	0.441108	1.57032e-90	8.21697e-90
Vdac1	0.326472	2.52124e-90	7.73534e-90	Tfrc	0.366218	3.65146e-27	1.04852e-26	Anpep	0.48434	2.04194e-90	1.06584e-89
Col7a1	0.465284	2.63755e-90	8.07326e-90	Slc6a8	0.37642	3.80199e-27	1.08942e-26	Atp5b	0.739132	2.49657e-90	1.29994e-89
Filip1l	0.412341	2.87017e-90	8.76476e-90	Sulf2	0.32206	3.91165e-27	1.11845e-26	Trib1	0.726733	4.06831e-90	2.11312e-89
S100a16	0.474414	4.68772e-90	1.42154e-89	Mfge8	0.462003	4.6129e-27	1.31615e-26	Taok3	0.526033	2.16342e-89	1.11277e-88
Eif3f	0.569131	4.95299e-90	1.49851e-89	Tanc2	0.33944	4.73505e-27	1.34813e-26	Myh9	0.559865	3.07246e-89	1.5765e-88
Arhgdib	0.453861	7.72437e-90	2.32621e-89	Mmp14	0.369076	4.89351e-27	1.39029e-26	Tpm3	0.607748	4.49668e-89	2.30169e-88
Rnpep	0.388431	1.18648e-89	3.56491e-89	Zbtb20	0.420454	5.39879e-27	1.53061e-26	Kras	0.560759	6.94371e-89	3.54565e-88
Tmc4	0.399118	1.38872e-89	4.16297e-89	Selenot	0.354534	5.79354e-27	1.63906e-26	Calm2	0.835173	8.4431e-89	4.30089e-88
Cct5	0.378271	1.57345e-89	4.69521e-89	Scand1	0.427368	6.20068e-27	1.75055e-26	Rbm3	0.743256	9.57447e-89	4.86549e-88
Chd3	0.332635	2.28029e-89	6.78893e-89	Fam210b	0.343586	6.31436e-27	1.7789e-26	Clasp1	0.39987	1.39467e-88	7.07036e-88
Calm3	0.36259	3.57276e-89	1.06127e-88	Higd1a	0.434699	6.4846e-27	1.81921e-26	Bax	0.825467	1.93777e-88	9.80011e-88
Zzef1	0.453697	4.55089e-89	1.3457e-88	Cxcl10	1.26211	6.8576e-27	1.91984e-26	Actn4	0.510018	2.76808e-88	1.39659e-87
Calr	0.474843	9.13662e-89	2.6835e-88	Chd7	0.3503	7.90485e-27	2.20383e-26	Stfa1	0.778512	5.348e-88	2.69183e-87
Reep5	0.37086	1.67091e-88	4.86387e-88	Cdcp1	0.340144	8.80485e-27	2.43953e-26	Fbxo32	0.562213	5.66413e-88	2.84417e-87
Sept9	0.372275	3.14492e-88	9.05377e-88	Slc30a4	0.354442	9.96263e-27	2.75462e-26	Clta	0.761804	7.61542e-88	3.81493e-87
Pa2g4	0.380359	3.16969e-88	9.10501e-88	P2rx2	0.393994	1.17532e-26	3.24302e-26	Tjp2	0.380307	9.14228e-88	4.56898e-87
Psma4	0.352381	5.07875e-88	1.44652e-87	Muc1	0.542066	1.88211e-26	5.15084e-26	Eif6	0.657243	1.31896e-87	6.57616e-87
Mrpl33	0.363234	5.07998e-88	1.44652e-87	Rps27l	0.399929	1.99831e-26	5.45771e-26	Snrpe	0.714894	1.46102e-87	7.26729e-87
Mmp14	0.358238	5.55151e-88	1.57735e-87	Gns	0.356654	2.60592e-26	7.05968e-26	Atp6v0e	0.756078	1.74007e-87	8.63499e-87
Dcaf12	0.369366	6.61972e-88	1.87678e-87	Bmyc	0.371717	2.67987e-26	7.24537e-26	Rps21	0.433458	1.91039e-87	9.458e-87
Rps12	0.351706	9.53484e-88	2.68578e-87	Abcg1	0.40609	3.18974e-26	8.58925e-26	Plpp2	0.521935	2.00666e-87	9.91139e-87
Atp5mpl	0.483529	1.23231e-87	3.46372e-87	Fam162a	0.558742	3.2114e-26	8.63024e-26	Chd7	0.350873	2.2795e-87	1.12328e-86
Fuca1	0.330997	1.57891e-87	4.40008e-87	Il18bp	0.348382	3.6724e-26	9.81012e-26	Ctss	0.338063	2.49522e-87	1.22672e-86
St3gal4	0.32229	3.32882e-87	9.19825e-87	Nadk	0.369731	4.07749e-26	1.08706e-25	Thbs1	0.657204	3.79379e-87	1.86081e-86
Ctsh	0.461054	3.68491e-87	1.01607e-86	Icam1	0.483532	4.15807e-26	1.10634e-25	Emp2	0.481245	4.12349e-87	2.01784e-86
Fam214b	0.401128	4.16287e-87	1.14304e-86	Smarca4	0.330023	4.35881e-26	1.15746e-25	Slc9a3r1	0.579537	7.28812e-87	3.55822e-86
Eif3i	0.38203	4.31622e-87	1.18266e-86	Ube2m	0.328211	5.03351e-26	1.33135e-25	Enah	0.496925	1.03378e-86	5.03551e-86
Ehd4	0.355051	5.41697e-87	1.47807e-86	Tent5a	0.422066	6.08686e-26	1.60363e-25	Pik3c2a	0.442006	1.0523e-86	5.11392e-86
Arpc1b	0.533905	1.14229e-86	3.11037e-86	Ralb	0.414694	7.02024e-26	1.84591e-25	Hmgn1	0.755315	1.26022e-86	6.11033e-86
Mgp	0.597507	2.5721e-86	6.98906e-86	Gde1	0.322051	8.72322e-26	2.2892e-25	Hist2h3c2	0.357279	1.76653e-86	8.54566e-86
Sh3pxd2a	0.42135	2.7368e-86	7.4058e-86	Myo10	0.323061	1.17978e-25	3.07799e-25	Npepps	0.480734	2.03581e-86	9.82582e-86
Actn1	0.407871	2.90382e-86	7.84153e-86	Nr1h2	0.387425	1.25473e-25	3.26716e-25	Psme2	0.577676	3.38087e-86	1.62806e-85
Ssrp1	0.359812	3.44328e-86	9.2791e-86	Trim26	0.352364	2.15991e-25	5.58081e-25	Ybx3	0.442015	3.85213e-86	1.85077e-85
Asna1	0.332652	4.61493e-86	1.23855e-85	Ybx1	0.402085	2.43102e-25	6.2572e-25	Rpl14	0.450166	4.1878e-86	2.00749e-85
Kcnn4	0.412085	6.93353e-86	1.85319e-85	Lrrfip2	0.336567	2.82259e-25	7.2416e-25	Znrf1	0.362353	6.37309e-86	3.04813e-85
Rab22a	0.357503	8.03867e-86	2.14419e-85	Nmi	0.339529	2.82428e-25	7.2416e-25	Edn1	0.849632	9.50397e-86	4.5353e-85
Wnt7b	0.416656	1.13664e-85	3.01336e-85	Atp5e	0.336135	2.92681e-25	7.49018e-25	Sqor	0.637987	1.00729e-85	4.79595e-85
Cpne8	0.335391	1.75221e-85	4.61722e-85	Tnfrsf23	0.450445	3.18972e-25	8.14746e-25	Slc26a4	0.794203	1.60072e-85	7.6043e-85
Lypd3	0.473819	1.81002e-85	4.75996e-85	Endod1	0.345714	3.34455e-25	8.52671e-25	Acer3	0.397171	3.27385e-85	1.55178e-84
Plekhb2	0.355975	1.94212e-85	5.09709e-85	Gtf2h5	0.415925	3.40583e-25	8.66644e-25	Capg	0.654338	3.84573e-85	1.81876e-84
Txn1	0.539618	2.35879e-85	6.17825e-85	Sectm1b	0.386556	4.32002e-25	1.09511e-24	Smad4	0.468144	5.55346e-85	2.62054e-84
Ndufc2	0.331783	2.96055e-85	7.73887e-85	Golga7	0.33269	4.76053e-25	1.2045e-24	Cox6c	0.613545	6.82964e-85	3.21556e-84
Hk2	0.400296	3.24054e-85	8.45387e-85	Grpel2	0.344142	5.20479e-25	1.31443e-24	Dusp16	0.396773	8.90131e-85	4.18164e-84
Tmem238	0.367249	3.90113e-85	1.01367e-84	Tmsb4x	0.433213	6.97629e-25	1.74212e-24	Capzb	0.703043	8.99593e-85	4.21672e-84
Arl8b	0.364776	9.85642e-85	2.54089e-84	Psmb10	0.359825	8.72301e-25	2.16621e-24	Hspa1b	0.628368	9.51817e-85	4.45164e-84
Abl2	0.419609	1.12136e-84	2.88508e-84	Tcirg1	0.438737	8.94791e-25	2.21387e-24	Hspa4	0.471277	1.20501e-84	5.6234e-84
Pomp	0.349389	1.5356e-84	3.93534e-84	Pdhb	0.341315	1.34516e-24	3.30984e-24	Lmna	0.780896	3.90797e-84	1.8197e-83
Slc2a1	0.330102	1.61834e-84	4.13119e-84	Ifitm2	0.48426	1.46231e-24	3.59149e-24	Atp6v1f	0.712734	3.98925e-84	1.85347e-83
Atp6v1f	0.345532	1.78146e-84	4.52989e-84	Cdc34	0.348467	1.51051e-24	3.7031e-24	Plxnb2	0.325452	4.23375e-84	1.96275e-83
Ppp1r18	0.367391	3.38957e-84	8.58559e-84	Pim1	0.455702	1.53421e-24	3.75434e-24	Rrp1	0.63339	7.54604e-84	3.49066e-83
Myof	0.393829	4.88803e-84	1.23096e-83	Rin2	0.349417	1.55514e-24	3.79172e-24	Aes	0.73604	7.75093e-84	3.57761e-83
Csnk1e	0.343687	5.03649e-84	1.2659e-83	Chmp4b	0.389586	1.9559e-24	4.76019e-24	Gstt3	0.801985	8.64562e-84	3.98188e-83
Grn	0.420263	1.5477e-83	3.86778e-83	Cxcl15	0.47264	2.01751e-24	4.90122e-24	D8Ertd738e	0.705524	8.74601e-84	4.01936e-83
Ifi44	0.415689	2.43627e-83	6.06516e-83	Mndal	0.448735	2.09901e-24	5.09e-24	Mpzl3	0.367255	2.53215e-83	1.15865e-82
Pard6g	0.339426	2.47342e-83	6.14594e-83	Tmem14c	0.355085	2.33985e-24	5.63527e-24	Spint2	0.618835	4.2463e-83	1.93463e-82
Rps3	0.378144	2.59679e-83	6.44022e-83	Capzb	0.361765	2.65794e-24	6.3309e-24	Sox9	0.961351	4.72786e-83	2.1494e-82
Atox1	0.546778	2.64349e-83	6.54363e-83	Tagln2	0.43942	3.15403e-24	7.45953e-24	Nmi	0.500537	5.91136e-83	2.68168e-82
Eya2	0.388902	9.49756e-83	2.32895e-82	Pak1	0.328693	6.27173e-24	1.46268e-23	Hspa9	0.594619	5.97925e-83	2.70667e-82
Gipc1	0.379618	1.32035e-82	3.2256e-82	Adam8	0.404327	7.04756e-24	1.63792e-23	Slc2a1	0.512079	8.3689e-83	3.78031e-82
4930453N24Rik	0.390521	1.78234e-82	4.34612e-82	Eif3f	0.407739	7.12147e-24	1.65223e-23	Rab11a	0.6836	8.83355e-83	3.98169e-82
Cdc42ep1	0.378875	1.80883e-82	4.40249e-82	Echdc2	0.399156	7.66666e-24	1.76953e-23	Ptgr1	0.66418	1.42258e-82	6.39861e-82
Ssna1	0.32843	2.07015e-82	5.02917e-82	Lamtor5	0.325725	1.00289e-23	2.30286e-23	Luzp1	0.471238	3.5258e-82	1.57914e-81
Dtymk	0.322016	2.32018e-82	5.6261e-82	Gbp7	0.383493	1.05266e-23	2.4089e-23	Rnh1	0.715089	4.68631e-82	2.09447e-81
Kif5b	0.353975	3.96737e-82	9.56707e-82	Prnp	0.323562	1.09343e-23	2.49368e-23	Slc15a2	0.37954	7.72575e-82	3.44562e-81
Commd3	0.336777	1.1115e-81	2.66068e-81	Ddit4	0.432861	1.12339e-23	2.55768e-23	Map1lc3a	0.721374	9.1055e-82	4.05243e-81
Psma5	0.336109	2.50416e-81	5.97251e-81	Optn	0.3603	1.15956e-23	2.63554e-23	Cadm1	0.49008	9.58125e-82	4.2552e-81
Sec61b	0.548516	2.9135e-81	6.93614e-81	Nfe2l1	0.332616	1.17022e-23	2.65079e-23	Arpc5	0.620491	1.08537e-81	4.81022e-81
N4bp1	0.356254	3.24693e-81	7.7159e-81	C3	0.391032	1.48711e-23	3.346e-23	Chmp4b	0.714694	1.54599e-81	6.82302e-81
Stat1	0.412282	4.07875e-81	9.675e-81	Pdk3	0.340025	1.57109e-23	3.52903e-23	Irf2bpl	0.374764	2.1548e-81	9.49008e-81
Tspan8	0.58335	4.08888e-81	9.68146e-81	Ctsh	0.368629	1.71733e-23	3.83185e-23	Anxa4	0.677333	2.50695e-81	1.10181e-80
Ddx39	0.391152	5.65121e-81	1.33565e-80	Mvb12a	0.346977	1.90444e-23	4.23526e-23	Ptprj	0.370383	2.56823e-81	1.1264e-80
Rhog	0.341068	7.10082e-81	1.67523e-80	Dusp7	0.325868	2.51029e-23	5.55495e-23	Dbi	0.822004	2.63882e-81	1.15496e-80
Cks1b	0.417376	8.01052e-81	1.88644e-80	Gng12	0.378885	3.0229e-23	6.65634e-23	Atp5f1	0.757923	8.69407e-81	3.78174e-80
Bhlhe41	0.351522	9.37059e-81	2.19881e-80	Bsg	0.414801	3.14798e-23	6.92039e-23	Abcd3	0.487763	1.10621e-80	4.8019e-80
Gm15823	0.454441	9.98793e-81	2.33947e-80	Bcl10	0.341137	3.57886e-23	7.85475e-23	Eif4a1	0.704833	1.17614e-80	5.09501e-80
Eef2	0.546503	1.06901e-80	2.49945e-80	Srgap1	0.335141	3.89064e-23	8.51117e-23	Ogfr	0.419254	1.22715e-80	5.3051e-80
Aldoa	0.409474	1.46581e-80	3.42109e-80	Slc39a4	0.497125	3.9675e-23	8.66517e-23	Gpd2	0.325954	1.66167e-80	7.16892e-80
Wwtr1	0.345025	1.58681e-80	3.69691e-80	Misp	0.338402	4.12468e-23	8.99382e-23	Tkt	0.616799	1.71792e-80	7.3965e-80
Bmyc	0.373278	2.16851e-80	5.04314e-80	Ctnnbip1	0.385043	4.7058e-23	1.02443e-22	Ifitm2	0.762375	1.90763e-80	8.19661e-80
Bak1	0.336219	3.67587e-80	8.53351e-80	Krt15	0.510978	5.39669e-23	1.17103e-22	Idh1	0.396028	2.56253e-80	1.09882e-79
Tlnrd1	0.361811	5.1832e-80	1.1969e-79	Dusp6	0.370203	6.99077e-23	1.49994e-22	Akirin1	0.505843	2.66545e-80	1.14064e-79
Sfr1	0.361634	1.00939e-79	2.32676e-79	H3f3a	0.360389	8.82324e-23	1.88107e-22	Ywhag	0.398597	2.94992e-80	1.25982e-79
Adam10	0.322877	2.30829e-79	5.30218e-79	Lysmd2	0.340289	9.40481e-23	2.00188e-22	Mapkapk2	0.382215	4.17758e-80	1.77694e-79
Nckap1	0.323571	3.2979e-79	7.56203e-79	Clic4	0.381716	9.66243e-23	2.05183e-22	Rps19	0.378526	4.95029e-80	2.10139e-79
Grina	0.332353	7.71146e-79	1.7559e-78	Map3k8	0.353732	1.02171e-22	2.16448e-22	Coro1c	0.382892	6.15797e-80	2.60881e-79
Fscn1	0.503249	2.10613e-78	4.77902e-78	Ifit1bl1	0.767596	1.18948e-22	2.51591e-22	1110008P14Rik	0.701924	6.83594e-80	2.89023e-79
Cox5a	0.390565	4.32548e-78	9.76408e-78	Nedd9	0.359677	1.20657e-22	2.54804e-22	Ndufa2	0.666487	1.34044e-79	5.64481e-79
Idh2	0.346831	4.5664e-78	1.02901e-77	Speer6-ps1	0.527559	1.31565e-22	2.76969e-22	Rpl21	0.442128	1.44964e-79	6.09253e-79
Tnfaip3	0.443858	7.37559e-77	1.63666e-76	Map1b	0.328755	1.53827e-22	3.21813e-22	Chd4	0.61988	1.7278e-79	7.24715e-79
Trim25	0.38962	7.74755e-77	1.71628e-76	Zfp36l1	0.383011	1.67099e-22	3.49035e-22	Gnb2	0.721135	2.59153e-79	1.08485e-78
Psmb9	0.422244	1.28876e-76	2.84529e-76	Gramd3	0.370549	1.71004e-22	3.56634e-22	Stap2	0.449039	2.92035e-79	1.21768e-78
Smim20	0.358697	2.39304e-76	5.25663e-76	Dhrs4	0.338494	1.7879e-22	3.72295e-22	Csrp1	0.840275	6.01486e-79	2.50304e-78
Psap	0.339835	3.6466e-76	7.99683e-76	Nxn	0.33238	2.61752e-22	5.39185e-22	Ywhaz	0.774854	7.1131e-79	2.95424e-78
Rpl23	0.333119	1.72981e-75	3.74316e-75	Tlr3	0.342327	2.91818e-22	5.9836e-22	Acox1	0.522354	8.43619e-79	3.48602e-78
Stat2	0.37055	2.05727e-75	4.44438e-75	Calcb	0.751249	3.20867e-22	6.55919e-22	Rab5c	0.475567	8.44296e-79	3.48602e-78
Vcl	0.359431	5.14893e-75	1.10322e-74	Ccl20	1.09976	3.65806e-22	7.43252e-22	Nedd8	0.699522	8.96896e-79	3.69598e-78
Idh1	0.372135	5.62036e-75	1.20226e-74	Grip2	0.326087	4.92277e-22	9.94192e-22	Neu1	0.507318	9.30485e-79	3.82694e-78
Cntfr	0.460305	8.96614e-75	1.91483e-74	Trim12a	0.363208	7.20979e-22	1.4517e-21	Gsr	0.752371	1.05764e-78	4.34147e-78
Gjb3	0.41323	9.15958e-75	1.95295e-74	Atp6v0e	0.379268	8.75175e-22	1.75166e-21	Lrrc26	0.729821	1.1826e-78	4.845e-78
Atp5g3	0.357142	9.26617e-75	1.97246e-74	Zzef1	0.368424	1.05543e-21	2.10302e-21	Uqcc2	0.687687	1.85712e-78	7.59373e-78
Rpl22	0.415593	3.48514e-74	7.35877e-74	Msn	0.36464	1.09735e-21	2.18007e-21	Zyx	0.333722	1.95773e-78	7.98964e-78
H2afj	0.394406	3.53539e-74	7.45283e-74	Iigp1	0.417729	1.45495e-21	2.86503e-21	Slc45a3	0.754565	2.34815e-78	9.56451e-78
Eppk1	0.346042	5.99561e-74	1.2538e-73	Ddit3	0.444101	1.69181e-21	3.30717e-21	Tjp3	0.332268	2.4536e-78	9.97481e-78
Endod1	0.326293	1.61549e-73	3.33562e-73	Oas1a	0.325159	1.74731e-21	3.41069e-21	Nfkbia	0.957324	2.54495e-78	1.03263e-77
Ccdc71l	0.457285	2.45339e-73	5.03387e-73	P4hb	0.352188	2.51855e-21	4.89474e-21	Mark2	0.463919	3.05446e-78	1.237e-77
Bzw2	0.349737	3.80489e-73	7.7703e-73	Ikzf2	0.323431	3.21245e-21	6.18062e-21	Arpp19	0.671478	4.05131e-78	1.63756e-77
Selenoh	0.326366	3.9877e-73	8.13093e-73	Xdh	0.325917	4.59586e-21	8.77928e-21	Cgn	0.395889	1.06889e-77	4.31227e-77
Cldn7	0.493289	9.81732e-73	1.98934e-72	Mx2	0.337895	5.16045e-21	9.82979e-21	Rab11fip1	0.829347	1.15237e-77	4.64022e-77
Ncoa7	0.398647	1.2191e-72	2.46268e-72	Mfsd4a	0.332959	6.57378e-21	1.23986e-20	Dnaja2	0.567783	1.19518e-77	4.80343e-77
Nans	0.417102	1.53675e-72	3.09959e-72	Nfkbia	0.444168	8.31742e-21	1.56652e-20	Ctsh	0.568444	1.76399e-77	7.06266e-77
Pclaf	0.704919	1.67858e-72	3.38043e-72	Ing4	0.336845	1.73091e-20	3.21045e-20	Ubl5	0.583557	2.06265e-77	8.2428e-77
Ptms	0.331928	2.65188e-72	5.32413e-72	Gpr155	0.348357	2.33548e-20	4.30203e-20	Cdc42ep5	0.539918	2.56082e-77	1.02143e-76
Psmb1	0.368882	4.38538e-72	8.79094e-72	Hes1	0.342975	4.57136e-20	8.3065e-20	Slc25a3	0.713595	3.00136e-77	1.19489e-76
Pik3r2	0.339016	4.51999e-71	8.97815e-71	Hist3h2a	0.360617	6.71894e-20	1.20941e-19	Pvr	0.337433	4.27433e-77	1.69848e-76
Sorcs2	0.352178	6.6263e-71	1.3142e-70	Mgst1	0.345502	7.3375e-20	1.31898e-19	Atp2c2	0.491988	4.30405e-77	1.70709e-76
Apol9b	0.375355	7.84692e-71	1.54923e-70	Fermt1	0.389789	7.69562e-20	1.37966e-19	Tor1aip2	0.542924	4.84635e-77	1.91857e-76
Ddx58	0.348151	9.0639e-71	1.78411e-70	Sftpd	0.476073	7.89742e-20	1.41394e-19	Gm47283	0.424409	5.07463e-77	2.00519e-76
Ranbp1	0.376117	9.51634e-71	1.86475e-70	Uba7	0.334285	9.41264e-20	1.67405e-19	Rtn3	0.565855	6.50939e-77	2.56254e-76
Slc30a4	0.340072	1.19416e-70	2.33648e-70	Lypd8	0.989399	1.09081e-19	1.93489e-19	Ets2	0.48293	6.72926e-77	2.64418e-76
Rpl4	0.380396	1.29651e-70	2.52915e-70	Smim22	0.365998	2.06989e-19	3.64268e-19	Rala	0.581369	9.53712e-77	3.73361e-76
Zbp1	0.368824	2.21145e-70	4.28838e-70	Hsd11b2	0.573805	2.94001e-19	5.15366e-19	Adam10	0.401833	1.24585e-76	4.85033e-76
Tmem40	0.340042	2.63593e-70	5.0964e-70	Prdx2	0.333227	3.94152e-19	6.85548e-19	Nudt19	0.545649	1.87917e-76	7.30252e-76
Ccdc80	0.390057	2.68314e-70	5.18e-70	Msln	0.56258	5.13961e-19	8.91619e-19	Nfkb1	0.360726	1.95976e-76	7.60172e-76
Dusp10	0.36781	7.40823e-70	1.42811e-69	Apoe	0.38854	5.49621e-19	9.51021e-19	Arf1	0.649886	2.52638e-76	9.78164e-76
Slc12a2	0.582584	1.11639e-69	2.14893e-69	Tbca	0.333086	1.16207e-18	1.98767e-18	Cdc37	0.619915	3.10645e-76	1.19618e-75
Car12	0.349724	1.27946e-69	2.45198e-69	Fabp5	0.51299	1.19052e-18	2.03374e-18	Itgav	0.403339	3.3666e-76	1.294e-75
Gpr87	0.386544	3.21241e-69	6.11153e-69	Rbm3	0.326045	1.27886e-18	2.18187e-18	Nampt	0.373747	3.54782e-76	1.36118e-75
Oas3	0.33535	3.36559e-69	6.39364e-69	Cald1	0.327982	1.34078e-18	2.28172e-18	Atp5j	0.655093	4.19848e-76	1.60789e-75
Ptgs2	0.549826	4.13175e-69	7.82638e-69	Cyba	0.455208	1.54437e-18	2.62152e-18	Hnrnpab	0.698721	5.33261e-76	2.03854e-75
Lif	0.458925	1.01949e-68	1.92277e-68	Gm10800	0.416648	1.79594e-18	3.04086e-18	Plet1	0.895277	5.89066e-76	2.24781e-75
Krt13	0.605404	1.0396e-68	1.95786e-68	Cstb	0.367154	2.3199e-18	3.90828e-18	Rock2	0.363355	6.81336e-76	2.59522e-75
Cmas	0.33766	1.51196e-68	2.84336e-68	H2-Ab1	0.384776	1.47267e-17	2.38797e-17	Eif3h	0.6622	6.83058e-76	2.59709e-75
Tap1	0.329432	1.74011e-68	3.26771e-68	Clec2d	0.567449	2.81012e-17	4.52929e-17	Eid1	0.575945	8.11912e-76	3.08147e-75
Creb5	0.340705	2.09118e-68	3.91573e-68	Eef1b2	0.365047	4.16653e-17	6.70747e-17	Jup	0.616152	8.14956e-76	3.08749e-75
Dusp5	0.439733	2.25232e-68	4.20765e-68	Fbxo32	0.334664	4.79507e-17	7.70083e-17	Anp32b	0.671094	9.41416e-76	3.5602e-75
Prrg4	0.343787	3.70274e-68	6.90367e-68	Atp5k	0.370281	8.38793e-17	1.33589e-16	Mfhas1	0.340077	1.06239e-75	4.01053e-75
Lgals1	0.67277	4.59375e-68	8.54059e-68	mt-Co1	0.33953	1.12176e-16	1.78021e-16	Pphln1	0.556826	1.52614e-75	5.74066e-75
Mdk	0.431563	2.79811e-67	5.16545e-67	Cldn3	0.351684	2.11438e-16	3.32792e-16	Polr1d	0.630032	1.68089e-75	6.31154e-75
Pglyrp1	0.844316	4.62712e-67	8.51782e-67	Tiparp	0.360356	6.468e-16	1.00739e-15	Pgd	0.486452	2.34392e-75	8.78553e-75
Hspa4l	0.332233	7.49351e-67	1.37363e-66	Cxcl17	0.435367	8.48173e-16	1.31796e-15	Ccng1	0.547664	3.27965e-75	1.22711e-74
Lurap1l	0.352864	1.06139e-66	1.93748e-66	Atp5mpl	0.328148	1.00507e-15	1.55549e-15	Gpx1	0.736231	3.3217e-75	1.24065e-74
Cyb5d2	0.373194	1.42997e-66	2.60665e-66	Akap10	0.843636	1.11771e-14	1.70712e-14	Pak1	0.345928	3.51381e-75	1.31009e-74
Arf5	0.330017	3.1481e-66	5.71467e-66	Prss27	0.356933	3.51921e-14	5.35064e-14	Prelid1	0.662039	4.8173e-75	1.79292e-74
Tnc	0.436716	4.40636e-66	7.97661e-66	Plk3	0.345921	4.26098e-14	6.45646e-14	Fth1	0.667393	1.03786e-74	3.84918e-74
Barx2	0.418479	1.00732e-65	1.81595e-65	Krt23	0.324175	2.44997e-13	3.68733e-13	Cpm	0.494037	1.07164e-74	3.96749e-74
Dnase2a	0.340722	1.75765e-65	3.16426e-65	Clca1	0.504091	3.93902e-13	5.90852e-13	Gm9973	1.06844	1.28749e-74	4.75832e-74
Parp9	0.325515	2.35641e-65	4.22473e-65	Plekhs1	0.376182	9.37359e-13	1.39666e-12	Arc	0.517639	2.45536e-74	9.05868e-74
Fn1	0.703563	3.33579e-65	5.97244e-65	Ifitm1	0.862621	1.06892e-12	1.5874e-12	Eif5a	0.635912	3.4057e-74	1.25211e-73
Prr9	0.700771	2.86766e-64	5.05807e-64	Mt2	0.468654	1.78485e-07	2.49322e-07	Pick1	0.36768	3.80529e-74	1.39659e-73
Ngf	0.545578	3.04048e-64	5.35568e-64	Zfp131	0.380188	9.33416e-07	1.29042e-06	Afdn	0.394687	4.90402e-74	1.79672e-73
Tspan1	0.860384	3.86538e-64	6.79954e-64	S100a1	0.356835	2.12154e-05	2.85354e-05	Retreg3	0.357887	5.48175e-74	2.00492e-73
Sema4b	0.367395	7.08754e-64	1.24341e-63					Rnf11	0.454605	7.98948e-74	2.91706e-73
Cenpm	0.38796	1.01815e-63	1.78142e-63					Scgb2b27	1.73637	1.05564e-73	3.84761e-73
Rbm3	0.390113	4.01582e-63	6.98892e-63					Mknk2	0.39997	1.06534e-73	3.87629e-73
Pigr	1.06474	1.35975e-62	2.35079e-62					Atox1	0.69681	1.1261e-73	4.09035e-73
Hs3st1	0.400379	2.01484e-62	3.47873e-62					Dazap2	0.561112	1.3806e-73	5.00616e-73
Prss22	0.433202	7.75258e-62	1.33676e-61					Hnrnpul2	0.407867	1.667e-73	6.03432e-73
Slc39a4	0.32205	1.25859e-61	2.16444e-61					Trp53	0.442728	1.81882e-73	6.57261e-73
Gsto1	0.368651	3.01739e-60	5.13506e-60					Cxcl10	0.721589	1.96803e-73	7.0997e-73
Birc5	0.624412	4.84958e-60	8.2424e-60					Dram2	0.469656	2.24783e-73	8.0815e-73
Cxcl2	0.97648	5.12396e-60	8.69742e-60					Vars	0.423469	2.61814e-73	9.39685e-73
Csf3	0.596664	6.75203e-60	1.14017e-59					Psmb9	0.470805	2.66955e-73	9.56512e-73
Cck	0.425794	1.94866e-59	3.27365e-59					Syngr2	0.628924	2.72512e-73	9.74774e-73
Fmo6	0.403568	2.29126e-59	3.84425e-59					Mapk3	0.482518	2.73932e-73	9.78195e-73
Cystm1	0.38919	9.36603e-59	1.5674e-58					Sh3glb1	0.558461	2.74423e-73	9.78299e-73
Cdca3	0.506815	1.01861e-58	1.70246e-58					Ywhae	0.660745	3.74441e-73	1.33261e-72
Pdgfb	0.401567	1.81569e-58	3.03079e-58					Pbxip1	0.416855	4.0311e-73	1.43223e-72
Stx11	0.351706	2.98738e-58	4.96756e-58					Ap1s3	0.636684	5.26272e-73	1.86668e-72
Ube2c	0.808271	4.5106e-58	7.47193e-58					0610040J01Rik	0.451736	5.49829e-73	1.94696e-72
Cxcl17	0.615951	2.20309e-57	3.62193e-57					Esrp1	0.389755	6.74512e-73	2.38448e-72
Cenpw	0.325353	4.76061e-57	7.78738e-57					Eif4e2	0.71052	7.4934e-73	2.64458e-72
Gm19220	0.331036	1.12561e-56	1.83438e-56					Dnaja1	0.716224	9.10552e-73	3.20818e-72
Fgfbp1	0.367147	1.37597e-56	2.2368e-56					Rassf3	0.438142	1.74683e-72	6.14444e-72
Hmgn1	0.407287	2.80186e-56	4.5491e-56					Psmd8	0.649877	3.03811e-72	1.06687e-71
Eif3h	0.366133	2.09531e-55	3.37263e-55					Tut7	0.385247	3.25125e-72	1.13982e-71
Cd74	0.360283	4.01247e-55	6.42683e-55					Rassf1	0.454936	3.66806e-72	1.28382e-71
Lig1	0.322099	1.72364e-54	2.75067e-54					Btg1	0.67623	4.21823e-72	1.47151e-71
Ptp4a3	0.326059	6.17689e-54	9.83337e-54					Ndufa6	0.603824	4.48606e-72	1.56236e-71
Tyms	0.329484	7.05971e-53	1.11979e-52					Ncl	0.696248	4.88907e-72	1.69992e-71
Il7	0.348924	1.06661e-52	1.68978e-52					Fxyd3	0.815808	8.82836e-72	3.06456e-71
Krt8	0.444177	3.00153e-52	4.73792e-52					Atp6v1a	0.491294	9.84173e-72	3.41072e-71
Rps27l	0.420236	3.15667e-52	4.9768e-52					Pgp	0.638833	1.22434e-71	4.2361e-71
Itga5	0.336235	5.29741e-52	8.33179e-52					Carhsp1	0.583998	1.2286e-71	4.24389e-71
Kctd11	0.389158	7.96779e-52	1.24867e-51					Nisch	0.390199	1.36001e-71	4.68251e-71
Pfn1	0.339634	5.3847e-51	8.41842e-51					Uhrf2	0.426205	3.03919e-71	1.04299e-70
Top2a	0.416896	3.81068e-50	5.95049e-50					Smim22	0.678565	3.24145e-71	1.1106e-70
Igfbp3	0.378433	2.8811e-49	4.4882e-49					Lap3	0.676722	4.55883e-71	1.55693e-70
Fabp5	0.797085	3.1336e-49	4.87574e-49					Mrpl33	0.636903	5.17805e-71	1.76555e-70
Qsox1	0.39303	1.50682e-48	2.34175e-48					Rplp2	0.405482	5.23317e-71	1.78147e-70
Arpc2	0.345437	2.57697e-48	4.00012e-48					Tsc22d2	0.865461	6.30475e-71	2.14281e-70
Ly6e	0.466009	2.79407e-48	4.33196e-48					Tmod3	0.377349	8.60546e-71	2.91537e-70
Sfn	0.471985	5.16882e-47	7.9854e-47					Dag1	0.353847	1.04972e-70	3.5449e-70
Eef1g	0.355873	3.80198e-46	5.8461e-46					Ncstn	0.458888	1.38841e-70	4.68117e-70
Lcn2	0.427309	1.02892e-44	1.57287e-44					Mtch1	0.57105	1.64867e-70	5.54982e-70
Cldn3	0.407009	1.68421e-43	2.56857e-43					Tgif1	0.676318	1.68432e-70	5.66083e-70
Cenpa	0.447714	3.40636e-43	5.18894e-43					Ubxn1	0.735014	2.31279e-70	7.76071e-70
Btf3	0.331498	5.71338e-43	8.69312e-43					Rp9	0.599264	4.6434e-70	1.55565e-69
Ybx1	0.346736	1.02787e-42	1.56031e-42					Rpl4	0.46626	5.27396e-70	1.76411e-69
Spink5	0.907198	2.91073e-42	4.41337e-42					Dsp	0.414833	8.48009e-70	2.83206e-69
Nupr1	0.736341	9.57374e-42	1.44993e-41					Ncor1	0.508633	1.18835e-69	3.96241e-69
Chchd10	0.332494	5.42034e-30	8.03219e-30					Pbx1	0.62683	1.23309e-69	4.10511e-69
Tagln	0.555637	3.86444e-28	5.69428e-28					Arid1a	0.431196	2.23919e-69	7.44283e-69
Oit1	0.396011	7.45092e-19	1.036e-18					Lpp	0.395047	2.38983e-69	7.93108e-69
Dcn	0.576202	9.80427e-17	1.3376e-16					Caprin1	0.496129	2.39711e-69	7.94278e-69
								Atp5e	0.538776	2.98131e-69	9.84766e-69
								Cdc42	0.646624	3.55897e-69	1.17191e-68
								Ctnnd1	0.454357	3.91849e-69	1.28629e-68
								U2af2	0.349012	5.92079e-69	1.94055e-68
								Dlgap4	0.344268	8.56802e-69	2.80384e-68
								Gm12873	0.365949	9.98437e-69	3.26228e-68
								Ube2h	0.502755	1.32491e-68	4.32233e-68
								Mgst3	0.614628	1.55193e-68	5.05512e-68
								Ddx17	0.447654	1.65804e-68	5.39245e-68
								Myl12b	0.69453	1.99364e-68	6.47397e-68
								Gjb2	0.53858	2.34027e-68	7.57633e-68
								Bex3	0.635567	2.62284e-68	8.47811e-68
								Nipal2	0.479524	3.62404e-68	1.16965e-67
								Cldn4	1.1244	3.63155e-68	1.17029e-67
								Tspo	0.667292	6.21153e-68	1.99866e-67
								Celf1	0.436058	6.8058e-68	2.18654e-67
								Ube2l3	0.612453	8.48483e-68	2.72184e-67
								Gstm5	0.70787	9.30824e-68	2.98146e-67
								Rtcb	0.609765	1.09188e-67	3.49203e-67
								Bace2	0.329952	1.87211e-67	5.9783e-67
								Smarca4	0.362118	1.89134e-67	6.0306e-67
								Kif5b	0.702249	2.52878e-67	8.05095e-67
								Ankrd11	0.327491	2.66274e-67	8.4647e-67
								9530068E07Rik	0.361409	2.95285e-67	9.35879e-67
								Ddah2	0.379092	3.47163e-67	1.09701e-66
								Timm8b	0.627449	4.66289e-67	1.46905e-66
								Psap	0.797329	5.35667e-67	1.68512e-66
								Morf4l1	0.641284	6.65397e-67	2.09012e-66
								Myo5c	0.55982	7.7978e-67	2.44578e-66
								Map2k3	0.546594	9.96916e-67	3.12219e-66
								Tacc2	0.534353	1.23909e-66	3.87492e-66
								Syne2	0.337452	1.33564e-66	4.17066e-66
								Ostf1	0.61704	1.48351e-66	4.62557e-66
								Btf3	0.562408	2.32693e-66	7.23402e-66
								Arhgef5	0.372839	2.5738e-66	7.98973e-66
								Ptbp3	0.37031	3.04699e-66	9.44477e-66
								Ghitm	0.556831	3.15081e-66	9.75228e-66
								Errfi1	0.757223	4.09328e-66	1.26509e-65
								Lamc2	0.504698	6.32456e-66	1.95184e-65
								Zfp91	0.415448	8.72139e-66	2.6837e-65
								Arpc4	0.472273	9.03097e-66	2.77492e-65
								Nono	0.444532	1.01686e-65	3.11995e-65
								Pdap1	0.569246	1.03355e-65	3.16654e-65
								Cox7b	0.583336	1.10171e-65	3.3705e-65
								F2rl1	0.399531	1.16319e-65	3.55344e-65
								Sfr1	0.534675	1.40185e-65	4.27635e-65
								Map3k1	0.448078	2.2746e-65	6.92869e-65
								Sorl1	0.410885	3.02695e-65	9.20717e-65
								Tent5a	0.45886	4.07318e-65	1.23717e-64
								Ccar1	0.391303	4.17223e-65	1.26544e-64
								Klf5	0.721826	4.25544e-65	1.28882e-64
								Eif2s1	0.522845	5.03723e-65	1.52124e-64
								Atp5c1	0.617611	5.12469e-65	1.54545e-64
								Cd74	0.499854	5.18736e-65	1.56212e-64
								Hnrnpa2b1	0.675054	5.68585e-65	1.7098e-64
								Bri3	0.678591	6.40871e-65	1.92443e-64
								Gne	0.731783	6.43794e-65	1.93047e-64
								Tpp1	0.327872	6.7936e-65	2.03135e-64
								Reep3	0.533022	8.91782e-65	2.66275e-64
								1810037I17Rik	0.659148	9.97663e-65	2.9747e-64
								Dap	0.675165	1.23076e-64	3.66455e-64
								Anp32a	0.625701	1.42643e-64	4.24116e-64
								Dctn3	0.636799	1.80096e-64	5.34724e-64
								Rab7	0.530366	1.965e-64	5.82609e-64
								Serbp1	0.63358	2.00082e-64	5.924e-64
								Cox7a2l	0.541541	2.01033e-64	5.94383e-64
								Pdcd6	0.495613	2.26554e-64	6.68904e-64
								Csnk2b	0.451486	2.35239e-64	6.93577e-64
								S100a16	0.594562	2.5384e-64	7.47378e-64
								Rab14	0.562445	2.64516e-64	7.77342e-64
								Rps4x	0.433698	2.76922e-64	8.11945e-64
								Pon2	0.510426	3.99704e-64	1.17032e-63
								Dnase2a	0.580419	4.26489e-64	1.24702e-63
								H2afz	0.650508	5.2248e-64	1.52558e-63
								Suco	0.547198	5.8352e-64	1.70146e-63
								Uqcr11	0.526718	6.16286e-64	1.79453e-63
								Pgls	0.63796	6.91873e-64	2.01186e-63
								Calm3	0.57247	7.20776e-64	2.09302e-63
								Baz1a	0.332096	7.47329e-64	2.16715e-63
								Cdkn2c	0.350261	7.78353e-64	2.25403e-63
								Psmc5	0.627676	7.96153e-64	2.30242e-63
								Gsto1	0.744489	8.93772e-64	2.57767e-63
								Uqcrq	0.540947	1.19665e-63	3.44178e-63
								Rps27l	0.555024	1.19934e-63	3.44484e-63
								Sdhc	0.49661	1.27922e-63	3.66931e-63
								Arl6ip5	0.668656	1.33342e-63	3.81959e-63
								Hk2	0.781442	1.43507e-63	4.10519e-63
								Stk17b	0.388078	1.75414e-63	4.99763e-63
								Trp53inp2	0.360277	1.98267e-63	5.64114e-63
								Chd3	0.428014	2.37589e-63	6.75086e-63
								Mllt3	0.372336	2.39406e-63	6.79333e-63
								Dach2	0.364758	2.43167e-63	6.89083e-63
								Ddt	0.727103	2.9602e-63	8.37733e-63
								Cops5	0.474733	3.46958e-63	9.80574e-63
								Phf5a	0.499652	3.59625e-63	1.01502e-62
								Zrsr1	0.544155	4.83326e-63	1.36052e-62
								Pfdn1	0.528529	5.12153e-63	1.43975e-62
								Dynlrb1	0.65021	5.20677e-63	1.46177e-62
								Irf2bp2	0.367705	6.46893e-63	1.8137e-62
								Med28	0.607234	1.36721e-62	3.82312e-62
								Ddit4	0.631309	1.37823e-62	3.84884e-62
								Fam3c	0.483947	1.78717e-62	4.98428e-62
								Stat3	0.499064	1.87292e-62	5.21653e-62
								Efhd2	0.42123	2.08201e-62	5.79128e-62
								Tbca	0.582712	2.46234e-62	6.84018e-62
								Wdr1	0.514676	3.98673e-62	1.10603e-61
								Lrrfip1	0.534143	4.57357e-62	1.26717e-61
								F11r	0.514548	4.84089e-62	1.33948e-61
								Vmp1	0.615409	5.59268e-62	1.54548e-61
								Metap2	0.631901	6.30326e-62	1.73957e-61
								Lamp2	0.604284	6.46781e-62	1.78265e-61
								Psma7	0.657317	6.51164e-62	1.7924e-61
								Cct3	0.491566	7.19784e-62	1.97613e-61
								Rfk	0.346325	9.40355e-62	2.57835e-61
								Chka	1.03574	9.9518e-62	2.72514e-61
								Stx7	0.466652	1.0745e-61	2.93853e-61
								Atl2	0.395236	1.40964e-61	3.8501e-61
								Psmb4	0.63608	1.67476e-61	4.56832e-61
								Cdc42se1	0.325581	1.98965e-61	5.42025e-61
								Trafd1	0.359632	2.03058e-61	5.52465e-61
								Esyt2	0.344312	2.46364e-61	6.69426e-61
								Prss8	0.409978	2.50071e-61	6.78626e-61
								Smagp	0.560029	3.33397e-61	9.03592e-61
								Nfib	0.609892	4.92325e-61	1.33091e-60
								Cebpg	0.356879	5.12082e-61	1.38255e-60
								Ctnna1	0.597869	5.55735e-61	1.49659e-60
								Ermp1	0.335246	6.12907e-61	1.64846e-60
								Ccnl2	0.398256	6.8273e-61	1.83391e-60
								Ctsd	0.713535	7.06336e-61	1.89492e-60
								Zmat2	0.571008	7.44554e-61	1.99491e-60
								Hspb1	1.05487	7.5255e-61	2.01379e-60
								Hipk1	0.376636	9.42958e-61	2.51694e-60
								Mrpl9	0.440482	9.91294e-61	2.64262e-60
								Slc35f5	0.466035	1.42064e-60	3.78242e-60
								Lamtor5	0.487865	2.39598e-60	6.3393e-60
								Ptges3	0.52572	2.58812e-60	6.83912e-60
								Lpcat4	0.370415	3.16935e-60	8.36455e-60
								Csnk1d	0.383889	3.21861e-60	8.48395e-60
								Trir	0.557014	4.15218e-60	1.09311e-59
								Ubald1	0.563235	4.80995e-60	1.26325e-59
								Cfl1	0.624264	4.81037e-60	1.26325e-59
								Rac1	0.539913	5.20804e-60	1.36429e-59
								Pafah1b3	0.508392	5.80644e-60	1.51728e-59
								Dync1li2	0.329707	6.21416e-60	1.62182e-59
								Slc31a1	0.472043	7.30352e-60	1.90378e-59
								Snrpb	0.593726	7.76841e-60	2.02247e-59
								Pdhb	0.475012	7.81005e-60	2.0308e-59
								Map2k1	0.328775	1.57395e-59	4.08763e-59
								Rgs2	1.02319	1.6616e-59	4.30469e-59
								Rhoa	0.599788	1.69907e-59	4.39636e-59
								Twf1	0.413483	1.71784e-59	4.43949e-59
								Trappc6a	0.657109	1.88544e-59	4.8667e-59
								Clptm1	0.405828	2.07911e-59	5.36005e-59
								Tcn2	0.489274	3.37392e-59	8.67697e-59
								Cdc34	0.324668	3.58656e-59	9.20144e-59
								Psmd1	0.500143	3.6041e-59	9.23524e-59
								Tmc4	0.445405	3.95897e-59	1.01323e-58
								Tmprss2	0.430181	4.21458e-59	1.07734e-58
								Swi5	0.613484	4.94714e-59	1.26308e-58
								Hnrnpu	0.589499	6.20336e-59	1.57999e-58
								Cyhr1	0.343371	7.34671e-59	1.8667e-58
								Psma1	0.529317	7.96506e-59	2.02138e-58
								Rab25	0.578865	1.02903e-58	2.60211e-58
								Cd151	0.389747	1.04801e-58	2.64696e-58
								Dnajc15	0.521556	1.33705e-58	3.37295e-58
								Cmtm8	0.548244	1.44475e-58	3.64028e-58
								Cldn7	0.723756	1.48887e-58	3.74698e-58
								Polr2f	0.529371	1.76189e-58	4.42357e-58
								Ccdc12	0.508631	2.19831e-58	5.50619e-58
								Glrx5	0.480319	2.99831e-58	7.50109e-58
								Npm1	0.621642	3.3283e-58	8.31683e-58
								Dync1h1	0.350246	3.3743e-58	8.42181e-58
								Oaz2	0.467508	3.63197e-58	9.05422e-58
								Ndufa4	0.546195	3.82956e-58	9.53557e-58
								Slc25a30	0.474342	4.61236e-58	1.14712e-57
								Ube2r2	0.502382	4.88254e-58	1.21289e-57
								Ube2f	0.432575	4.9215e-58	1.22113e-57
								Ifngr2	0.509728	5.12457e-58	1.27003e-57
								Ndufa13	0.5583	5.81674e-58	1.43988e-57
								Hist3h2a	0.42541	7.36256e-58	1.8204e-57
								Gpr155	0.443107	9.66549e-58	2.38423e-57
								Ppp2ca	0.564309	1.14289e-57	2.81594e-57
								Hsp90aa1	0.75487	1.24112e-57	3.05189e-57
								Impa1	0.366368	1.24155e-57	3.05189e-57
								Psmd4	0.58492	1.30039e-57	3.19284e-57
								Eif3f	0.562461	1.84263e-57	4.51369e-57
								Hnrnpa1	0.577777	1.87377e-57	4.58466e-57
								Rars	0.394527	1.90537e-57	4.6566e-57
								Mkln1	0.370649	2.40916e-57	5.87423e-57
								Cdkn1a	0.709443	2.80349e-57	6.82785e-57
								Ddx6	0.366705	2.90114e-57	7.05754e-57
								Wasl	0.405883	3.28398e-57	7.9797e-57
								Pak2	0.359661	3.60649e-57	8.7533e-57
								Ceacam1	0.851993	3.76908e-57	9.13743e-57
								Mfap3l	0.375035	3.77639e-57	9.14465e-57
								R3hdm4	0.460878	4.88906e-57	1.1812e-56
								Mrpl35	0.466687	5.15419e-57	1.24383e-56
								Ssbp3	0.362693	5.31296e-57	1.27923e-56
								Sbno2	0.326668	5.60896e-57	1.34896e-56
								Hnrnpk	0.594897	6.83887e-57	1.64288e-56
								Ehf	0.561007	8.47044e-57	2.03252e-56
								Anxa5	0.472373	9.30251e-57	2.22965e-56
								Yap1	0.368597	1.25627e-56	3.00766e-56
								Med21	0.507113	1.36437e-56	3.26276e-56
								Rad23b	0.500228	1.59019e-56	3.79848e-56
								Purb	0.455582	1.75719e-56	4.19266e-56
								Lamp1	0.608212	1.85304e-56	4.41638e-56
								Ptpn18	0.379151	1.96005e-56	4.66615e-56
								Med19	0.390947	2.28345e-56	5.42993e-56
								Myo1d	0.325653	2.39663e-56	5.69267e-56
								Chmp2a	0.552257	2.46063e-56	5.83813e-56
								Elovl1	0.376962	2.51698e-56	5.96513e-56
								Arpc5l	0.48826	2.54251e-56	6.01889e-56
								Crb3	0.511843	2.78898e-56	6.59497e-56
								Enpp5	0.457323	3.89436e-56	9.17802e-56
								Larp4b	0.363167	4.18984e-56	9.86339e-56
								Fkbp8	0.539205	5.92043e-56	1.39219e-55
								Vdac3	0.513448	9.28721e-56	2.18146e-55
								Psmd13	0.486195	9.41012e-56	2.20788e-55
								Cnih4	0.432349	1.02927e-55	2.41229e-55
								Tmem54	0.353775	1.25118e-55	2.92588e-55
								Krtcap3	0.340256	1.41758e-55	3.31134e-55
								Szrd1	0.341771	1.61892e-55	3.77747e-55
								Prrc2a	0.351727	1.66682e-55	3.88068e-55
								Rpsa	0.524089	1.78057e-55	4.14094e-55
								Pdcd6ip	0.399034	1.82779e-55	4.24611e-55
								Bloc1s2	0.401947	1.93162e-55	4.48237e-55
								Mtch2	0.564267	2.15246e-55	4.98936e-55
								Mdh2	0.621308	2.27596e-55	5.26986e-55
								Mapk1	0.503661	2.29471e-55	5.30745e-55
								Atp6v1e1	0.548191	2.54556e-55	5.8748e-55
								Psmb1	0.610901	2.55207e-55	5.8834e-55
								Ccdc25	0.376767	2.88473e-55	6.64305e-55
								Emc6	0.497133	3.38371e-55	7.77517e-55
								Lsr	0.521519	3.4786e-55	7.98454e-55
								Tsg101	0.559788	3.70361e-55	8.4918e-55
								Prom1	0.404928	3.84982e-55	8.81746e-55
								Pdha1	0.455543	4.50833e-55	1.03145e-54
								Safb2	0.341766	6.65318e-55	1.51888e-54
								Tmem238	0.560998	7.05718e-55	1.60937e-54
								Eef1g	0.600385	8.22807e-55	1.87437e-54
								Timm17a	0.523992	8.52879e-55	1.94078e-54
								Edf1	0.511997	8.57044e-55	1.94607e-54
								Dctn2	0.473593	9.22077e-55	2.09149e-54
								Bptf	0.336528	1.02224e-54	2.31621e-54
								Stmn1	0.390254	1.08697e-54	2.46023e-54
								Bsdc1	0.346707	1.11374e-54	2.51812e-54
								Psma2	0.58536	1.14015e-54	2.57508e-54
								Bcl10	0.409446	1.18173e-54	2.66614e-54
								Zwint	0.458501	1.28498e-54	2.896e-54
								Mrpl12	0.485108	1.48585e-54	3.34514e-54
								Tmem14c	0.545607	1.61116e-54	3.62339e-54
								Eif2b2	0.366925	1.92024e-54	4.30933e-54
								Ptprf	0.430053	2.04435e-54	4.583e-54
								Cyp2f2	0.379555	2.3228e-54	5.19069e-54
								Cited1	0.613565	2.71753e-54	6.05998e-54
								Zfp703	0.367319	2.88811e-54	6.43358e-54
								mt-Nd6	0.763661	2.9505e-54	6.56565e-54
								Acin1	0.365642	3.30779e-54	7.34524e-54
								Hspd1	0.500482	4.09207e-54	9.06774e-54
								Acot13	0.482683	4.17521e-54	9.24231e-54
								Srek1ip1	0.353162	4.33117e-54	9.57751e-54
								Cox5b	0.570885	4.80174e-54	1.05959e-53
								Cab39	0.338226	4.82023e-54	1.06256e-53
								Ptges	0.325031	7.76524e-54	1.70819e-53
								Ubqln1	0.365079	7.876e-54	1.73076e-53
								Stx4a	0.417711	7.93889e-54	1.74276e-53
								Rab8a	0.32873	9.81284e-54	2.1519e-53
								Rela	0.332225	1.11111e-53	2.43408e-53
								Gng12	0.427948	1.15118e-53	2.51924e-53
								Casz1	0.456899	2.00944e-53	4.37933e-53
								Fgfbp1	0.777493	2.15197e-53	4.68513e-53
								Ppp2r1a	0.402386	3.14163e-53	6.82571e-53
								Hspa1a	0.649114	3.29363e-53	7.14859e-53
								Pigt	0.381731	3.52051e-53	7.63318e-53
								M6pr	0.443041	4.07514e-53	8.82668e-53
								Slfn5	0.452622	4.12124e-53	8.90827e-53
								Prkcsh	0.342298	4.41021e-53	9.51346e-53
								Cd47	0.427147	5.73555e-53	1.23221e-52
								Zfp36	0.742872	7.05512e-53	1.51417e-52
								Zbtb20	0.592178	7.13303e-53	1.52933e-52
								Vapb	0.433302	7.26219e-53	1.55545e-52
								Tcf25	0.487328	7.67968e-53	1.6432e-52
								Ndufa11	0.565954	8.02436e-53	1.71522e-52
								Fis1	0.509648	8.14466e-53	1.73917e-52
								Elf1	0.415195	1.18637e-52	2.52821e-52
								Nras	0.367476	1.20684e-52	2.56924e-52
								Hadha	0.325459	1.28115e-52	2.72469e-52
								Higd2a	0.578531	1.28779e-52	2.73607e-52
								mt-Nd4	0.768725	1.4862e-52	3.15127e-52
								G3bp1	0.343172	1.51179e-52	3.20233e-52
								Pfdn2	0.555619	2.01464e-52	4.26321e-52
								Ndufs6	0.5339	2.12984e-52	4.50249e-52
								Dusp3	0.355544	2.61471e-52	5.50548e-52
								Hnrnpa0	0.332373	3.31149e-52	6.95874e-52
								Sltm	0.4988	3.79228e-52	7.95325e-52
								Rbx1	0.586182	4.26449e-52	8.93473e-52
								Hbegf	0.783257	4.82805e-52	1.01054e-51
								Atp5g3	0.540224	5.25803e-52	1.09945e-51
								Palld	0.363217	6.57805e-52	1.37411e-51
								Atp6v1d	0.552535	6.89086e-52	1.43662e-51
								Chmp3	0.504198	7.59894e-52	1.58268e-51
								Gadd45b	0.367049	1.12339e-51	2.33514e-51
								Gm48368	0.393428	1.41139e-51	2.92805e-51
								Mrfap1	0.553534	1.6883e-51	3.49908e-51
								Wdr26	0.426115	1.7454e-51	3.61389e-51
								Ptms	0.437757	1.75846e-51	3.63736e-51
								Dync1i2	0.448957	2.2216e-51	4.59087e-51
								Bzw1	0.385027	2.62271e-51	5.40918e-51
								Prpf38b	0.365039	3.27154e-51	6.74077e-51
								Stxbp2	0.494982	5.27314e-51	1.08543e-50
								Klf9	0.509177	6.13052e-51	1.25947e-50
								Chchd3	0.376754	6.7563e-51	1.38534e-50
								Eapp	0.368726	8.28624e-51	1.69575e-50
								Cggbp1	0.460106	9.41491e-51	1.92487e-50
								Wbp2	0.331928	9.58469e-51	1.95768e-50
								Lamtor1	0.478021	1.06808e-50	2.17947e-50
								Ndufs4	0.572722	1.14228e-50	2.32862e-50
								Igbp1	0.378351	1.14438e-50	2.33066e-50
								Rdx	0.399935	1.26224e-50	2.56575e-50
								Hnrnpc	0.449208	1.45286e-50	2.94754e-50
								Isg20	0.43382	1.5129e-50	3.06641e-50
								Atxn7l3b	0.393434	2.03998e-50	4.1268e-50
								Lmo7	0.501854	2.25641e-50	4.56027e-50
								Cryl1	0.434107	2.31732e-50	4.67891e-50
								Slc25a39	0.448428	2.42869e-50	4.89909e-50
								Fundc2	0.436015	2.44632e-50	4.92996e-50
								Pcbp1	0.486427	2.99968e-50	6.03936e-50
								Cyb561	0.406002	3.04248e-50	6.1197e-50
								Ap1m2	0.395833	3.11616e-50	6.26193e-50
								Vasp	0.361902	3.40477e-50	6.83541e-50
								Mrpl32	0.521357	3.60407e-50	7.22181e-50
								Lrp10	0.334253	3.68664e-50	7.38027e-50
								Rnf6	0.323867	3.71315e-50	7.4263e-50
								Set	0.404011	3.74349e-50	7.4799e-50
								Spag9	0.435569	4.38707e-50	8.75756e-50
								Prkcd	0.327813	4.74142e-50	9.456e-50
								Dynlt3	0.446683	5.16104e-50	1.02832e-49
								Ppp5c	0.355147	5.75649e-50	1.14588e-49
								Ccng2	0.449673	6.67679e-50	1.32782e-49
								Ankrd17	0.392171	8.71175e-50	1.73089e-49
								Prdx1	0.521679	1.05946e-49	2.103e-49
								Chmp1b	0.379115	1.07665e-49	2.13512e-49
								Rbbp4	0.371649	1.15162e-49	2.28166e-49
								Cdk19	0.418899	1.4235e-49	2.81768e-49
								Snapc5	0.425425	1.48442e-49	2.93277e-49
								Klf6	0.820068	1.63559e-49	3.2224e-49
								Sf3b2	0.381028	1.73048e-49	3.40618e-49
								Dnajb6	0.495163	1.77193e-49	3.48451e-49
								Cbx1	0.442494	1.80857e-49	3.55327e-49
								Atp1a1	0.82415	1.81964e-49	3.5717e-49
								Paip2	0.524694	1.88249e-49	3.69163e-49
								Timm13	0.469961	1.95131e-49	3.82305e-49
								Med9	0.371369	2.01079e-49	3.93593e-49
								Psmb3	0.59853	2.06951e-49	4.04712e-49
								H2-T22	0.464697	2.40529e-49	4.69509e-49
								Sin3b	0.630553	2.61634e-49	5.10235e-49
								Psma6	0.449813	3.07485e-49	5.98549e-49
								Sdha	0.412062	3.41187e-49	6.62323e-49
								Vcp	0.503621	3.60092e-49	6.98381e-49
								Cacybp	0.403451	4.01124e-49	7.77246e-49
								Tor1aip1	0.355463	4.04482e-49	7.83035e-49
								Eif4g1	0.432684	5.32875e-49	1.03065e-48
								Park7	0.536372	5.75188e-49	1.11024e-48
								Ndufc2	0.612456	5.75602e-49	1.11024e-48
								Polr2m	0.418184	5.9568e-49	1.14792e-48
								Klf4	0.630208	8.59411e-49	1.65248e-48
								Ndufc1	0.583014	1.1384e-48	2.18424e-48
								Gsta4	0.365889	1.13862e-48	2.18424e-48
								Atrx	0.324218	1.2057e-48	2.31083e-48
								Cyc1	0.472648	1.33344e-48	2.55334e-48
								Prkci	0.349778	1.35233e-48	2.58716e-48
								Pum1	0.339722	1.40757e-48	2.69041e-48
								Vdac1	0.47584	1.76485e-48	3.36419e-48
								Six1	0.352357	1.94105e-48	3.69341e-48
								Prpf40a	0.384254	1.98768e-48	3.77874e-48
								Synj2bp	0.447992	2.09835e-48	3.98196e-48
								Malsu1	0.373729	2.22023e-48	4.20947e-48
								Gipc2	0.430866	2.34503e-48	4.44212e-48
								Dcxr	0.597802	2.53866e-48	4.8003e-48
								Phb2	0.480859	2.67592e-48	5.05081e-48
								Epn1	0.417428	2.70474e-48	5.10065e-48
								Zfp706	0.483923	2.99209e-48	5.62247e-48
								Zcrb1	0.455747	3.22333e-48	6.05161e-48
								Klf13	0.341542	3.29845e-48	6.18716e-48
								Ezr	0.517618	3.45833e-48	6.4813e-48
								Mgea5	0.33853	4.66381e-48	8.71732e-48
								Tsn	0.457655	5.19103e-48	9.6942e-48
								Trappc3	0.546423	5.26346e-48	9.82079e-48
								Rps20	0.43028	5.90651e-48	1.10012e-47
								Grina	0.369885	6.39051e-48	1.18922e-47
								Use1	0.49982	9.68118e-48	1.79684e-47
								Naa20	0.353768	1.01545e-47	1.88303e-47
								Slc4a7	0.335493	1.22405e-47	2.26588e-47
								Cct8	0.469931	1.31515e-47	2.4324e-47
								Eif3c	0.386075	1.398e-47	2.58337e-47
								Prr13	0.39109	1.40687e-47	2.59749e-47
								Rab6a	0.412714	1.59712e-47	2.94617e-47
								Ptpn1	0.377271	1.80366e-47	3.32138e-47
								Aup1	0.323117	1.94368e-47	3.57299e-47
								Atp6ap1	0.402567	2.42911e-47	4.44986e-47
								Pura	0.388354	4.03139e-47	7.37228e-47
								Ino80d	0.3783	4.30533e-47	7.86643e-47
								Oit1	0.680712	4.41863e-47	8.06648e-47
								Eif5b	0.462972	6.49205e-47	1.18414e-46
								Uqcrfs1	0.5254	6.55556e-47	1.19469e-46
								Ndufs2	0.456126	8.07961e-47	1.47117e-46
								Llph	0.489424	8.42086e-47	1.53199e-46
								Hibadh	0.601052	8.65974e-47	1.57274e-46
								Mea1	0.39703	1.03913e-46	1.88398e-46
								Liph	0.364622	1.07643e-46	1.94993e-46
								Gar1	0.32871	1.35378e-46	2.45025e-46
								Memo1	0.406663	1.44327e-46	2.60998e-46
								Rab10	0.473244	1.70021e-46	3.06937e-46
								Hes1	0.704611	1.70661e-46	3.0783e-46
								Ei24	0.454246	1.73933e-46	3.13465e-46
								Caln1	0.557632	1.981e-46	3.56715e-46
								Ppp1r2	0.379443	1.99951e-46	3.59742e-46
								Chmp1a	0.420598	2.42135e-46	4.34896e-46
								Hprt	0.452042	2.65571e-46	4.76585e-46
								Trp53bp2	0.334155	2.92792e-46	5.24989e-46
								Krcc1	0.520094	3.02176e-46	5.41356e-46
								Brk1	0.541529	3.3193e-46	5.94157e-46
								Cuta	0.467388	4.07185e-46	7.27632e-46
								Oaz1	0.398369	4.40699e-46	7.86857e-46
								Cnn3	0.332962	4.56458e-46	8.14306e-46
								Card19	0.410989	5.42256e-46	9.65737e-46
								Hnrnpm	0.4015	5.73674e-46	1.01997e-45
								Tle4	0.328159	5.98482e-46	1.06319e-45
								Selenot	0.323443	7.3774e-46	1.30947e-45
								Cox6a1	0.46617	7.42337e-46	1.31653e-45
								Cops9	0.506192	7.75105e-46	1.37349e-45
								Jak1	0.347005	8.51664e-46	1.50663e-45
								Desi1	0.326707	1.05744e-45	1.86909e-45
								Dtnbp1	0.347956	1.38069e-45	2.43434e-45
								Tuba1c	0.501346	1.39106e-45	2.45058e-45
								Gipc1	0.337704	1.47639e-45	2.59874e-45
								Vamp3	0.335291	1.78629e-45	3.139e-45
								Ola1	0.442486	2.53633e-45	4.45332e-45
								Gskip	0.378436	2.78631e-45	4.88818e-45
								Eif3b	0.341424	2.93801e-45	5.15004e-45
								Mdm2	0.35567	3.13259e-45	5.48657e-45
								Tmem159	0.514477	3.21561e-45	5.62731e-45
								Ptbp1	0.362646	3.36974e-45	5.89217e-45
								Sem1	0.440795	3.43146e-45	5.99512e-45
								Ifrd1	0.644262	3.72913e-45	6.50982e-45
								Eif1ax	0.459115	4.27198e-45	7.4513e-45
								Hsbp1	0.494773	4.50668e-45	7.85419e-45
								Senp6	0.337264	4.68773e-45	8.16298e-45
								Snrpd1	0.467393	6.05758e-45	1.0531e-44
								Gpd1	0.326145	8.11619e-45	1.40636e-44
								Itpa	0.326636	1.01562e-44	1.75697e-44
								Tma7	0.480292	1.05293e-44	1.82003e-44
								Ppp1r15b	0.324115	1.14474e-44	1.97549e-44
								Csnk1a1	0.445202	1.37698e-44	2.37434e-44
								Csde1	0.395866	1.52014e-44	2.61906e-44
								Urm1	0.352655	1.79025e-44	3.08191e-44
								Actr2	0.338369	2.15213e-44	3.69586e-44
								Ube2e3	0.415785	3.02917e-44	5.19357e-44
								Zfp738	0.332021	3.05996e-44	5.24211e-44
								Ubald2	0.324162	3.17963e-44	5.44271e-44
								Borcs8	0.417564	3.41544e-44	5.8369e-44
								Tubb5	0.403152	3.69174e-44	6.30399e-44
								Cops6	0.445062	4.53156e-44	7.72558e-44
								Eif4h	0.361139	5.39877e-44	9.18921e-44
								Svbp	0.351096	8.68558e-44	1.47599e-43
								Cfl2	0.349905	1.09498e-43	1.85777e-43
								Psmb2	0.560515	1.13433e-43	1.923e-43
								Ndufb5	0.502031	1.71514e-43	2.90297e-43
								Ube2j2	0.380567	2.26782e-43	3.83227e-43
								Cwc15	0.421102	2.39656e-43	4.04659e-43
								Arf5	0.503727	2.44043e-43	4.11409e-43
								Prdx6	0.410944	2.83185e-43	4.77015e-43
								Eif4b	0.399532	2.91069e-43	4.89514e-43
								Kmt5a	0.398932	3.04864e-43	5.12308e-43
								Mrpl30	0.510742	3.29347e-43	5.5301e-43
								Srp72	0.458924	3.6156e-43	6.06617e-43
								Fam32a	0.410104	3.75449e-43	6.28922e-43
								Elob	0.456158	3.94583e-43	6.59928e-43
								Akirin2	0.322271	4.55195e-43	7.60698e-43
								Sdf4	0.425848	4.61554e-43	7.70715e-43
								Fosl2	0.443791	5.12288e-43	8.54757e-43
								4833439L19Rik	0.347843	5.31667e-43	8.86391e-43
								Ube2b	0.458381	5.69742e-43	9.49121e-43
								Ube2d2a	0.460471	9.55623e-43	1.5882e-42
								Max	0.411358	1.01643e-42	1.6866e-42
								Atp6v0d1	0.430107	1.03113e-42	1.70965e-42
								Ergic3	0.453622	1.24608e-42	2.06282e-42
								Top1	0.447898	1.39703e-42	2.3109e-42
								Rnf10	0.402011	1.9521e-42	3.21898e-42
								Higd1a	0.595329	2.01477e-42	3.31716e-42
								Psma4	0.443519	2.08913e-42	3.43691e-42
								Rtf1	0.39544	2.16453e-42	3.55818e-42
								Smco4	0.52472	2.92513e-42	4.80103e-42
								Taf1d	0.468972	3.19597e-42	5.24149e-42
								Bnip3l	0.445186	3.20823e-42	5.25345e-42
								March5	0.398942	3.93573e-42	6.43475e-42
								Mxd4	0.391297	4.49425e-42	7.34223e-42
								Bscl2	0.426999	4.62819e-42	7.55521e-42
								Miga1	0.348237	5.17502e-42	8.43485e-42
								Nenf	0.416813	5.62107e-42	9.1548e-42
								Ppm1g	0.377486	6.4755e-42	1.05302e-41
								Polb	0.476273	7.14132e-42	1.1604e-41
								Fam50a	0.329954	7.6658e-42	1.24466e-41
								Pla2g16	0.392534	8.69708e-42	1.41102e-41
								Gadd45a	0.512046	1.09204e-41	1.76902e-41
								Fkbp4	0.455393	1.13311e-41	1.83414e-41
								Mrpl18	0.589253	1.2459e-41	2.01518e-41
								Ik	0.355132	1.25087e-41	2.02167e-41
								Wac	0.334481	1.30138e-41	2.1017e-41
								Nop10	0.439147	1.33838e-41	2.1598e-41
								Golga4	0.409144	1.41524e-41	2.28209e-41
								Minos1	0.443067	1.52872e-41	2.46132e-41
								Psmd11	0.341136	1.55619e-41	2.50365e-41
								Mrpl27	0.45549	1.65821e-41	2.66575e-41
								Slirp	0.510948	1.72553e-41	2.77186e-41
								Fubp1	0.3286	1.80427e-41	2.89396e-41
								Acp1	0.423139	2.06291e-41	3.30629e-41
								Sri	0.490015	3.31271e-41	5.29333e-41
								Cdk11b	0.323446	3.33799e-41	5.32969e-41
								Ndufa7	0.392924	3.41122e-41	5.4425e-41
								mt-Cytb	0.589336	3.60841e-41	5.75277e-41
								Tmem126a	0.399466	3.89759e-41	6.20913e-41
								Ptpa	0.333505	4.09882e-41	6.51987e-41
								Ndufa3	0.475145	4.24006e-41	6.73946e-41
								Naa50	0.338094	5.00984e-41	7.95105e-41
								Sae1	0.408471	5.4832e-41	8.69578e-41
								Ywhaq	0.457627	6.33468e-41	1.00386e-40
								Ap1s1	0.378738	6.37615e-41	1.00968e-40
								Gdi2	0.47572	6.66459e-41	1.05456e-40
								Tomm7	0.467235	6.76221e-41	1.06841e-40
								Dnajc8	0.366685	7.72667e-41	1.21897e-40
								Eif3i	0.567358	8.02415e-41	1.26401e-40
								Ccn1	0.735173	8.75913e-41	1.37671e-40
								Cstb	0.490709	9.31817e-41	1.46349e-40
								Rnpep	0.349341	1.24002e-40	1.94466e-40
								Mrpl54	0.378919	1.2697e-40	1.98974e-40
								Nucks1	0.384868	1.3868e-40	2.17162e-40
								Chmp5	0.496217	1.4504e-40	2.26954e-40
								2410015M20Rik	0.451787	1.55233e-40	2.42544e-40
								Ppp4c	0.367193	1.67261e-40	2.61144e-40
								Tecr	0.553911	2.3039e-40	3.58912e-40
								Idh3b	0.417806	2.35855e-40	3.67155e-40
								Suds3	0.413202	2.74046e-40	4.2598e-40
								Tmbim6	0.435361	2.82559e-40	4.38891e-40
								Psmb10	0.340679	3.08128e-40	4.77203e-40
								Rhob	0.471439	3.13357e-40	4.84946e-40
								Glo1	0.417718	3.69478e-40	5.70545e-40
								Psme3	0.339182	3.77842e-40	5.83034e-40
								Pet100	0.456822	3.8943e-40	6.0004e-40
								Hddc2	0.344466	4.21538e-40	6.4904e-40
								Taf10	0.329915	4.87245e-40	7.49662e-40
								Glrx3	0.477004	4.88896e-40	7.51655e-40
								Psmd7	0.492073	5.32511e-40	8.18116e-40
								Ube2d3	0.44976	5.48488e-40	8.42051e-40
								Prrc2c	0.350833	5.71857e-40	8.7729e-40
								Paics	0.347592	5.93419e-40	9.0905e-40
								Hcfc1r1	0.464368	7.49995e-40	1.14641e-39
								Ap2m1	0.34166	7.78924e-40	1.18891e-39
								Rbm25	0.443456	8.42906e-40	1.28564e-39
								Nol7	0.493488	9.14868e-40	1.3944e-39
								Tuba4a	0.541339	9.58661e-40	1.46009e-39
								Txndc17	0.453564	1.09157e-39	1.66133e-39
								Tubb4b	0.508062	1.09363e-39	1.66326e-39
								Tpd52	0.493605	1.22905e-39	1.86654e-39
								Hspb8	0.434993	1.39992e-39	2.12298e-39
								Nme1	0.520646	1.53291e-39	2.32299e-39
								Foxp1	0.364439	2.00739e-39	3.03984e-39
								Olfr1033	0.341998	2.04169e-39	3.08957e-39
								Cmc1	0.382218	2.50464e-39	3.78471e-39
								Nt5c	0.337367	2.73741e-39	4.13054e-39
								Ube2a	0.372072	2.85585e-39	4.30618e-39
								Arhgap5	0.322121	2.92528e-39	4.40773e-39
								Trappc4	0.35636	2.96626e-39	4.46629e-39
								Hnrnph1	0.345465	2.96876e-39	4.46687e-39
								Tmem256	0.495345	3.05127e-39	4.58776e-39
								Qars	0.347082	3.20194e-39	4.81087e-39
								Suclg1	0.491032	3.2991e-39	4.95334e-39
								Gtf3c6	0.438574	3.87565e-39	5.80661e-39
								Ggnbp2	0.399028	3.8843e-39	5.81545e-39
								Sbds	0.546927	4.27759e-39	6.39521e-39
								Srpk1	0.350159	4.29553e-39	6.41749e-39
								Ndufs8	0.452068	4.66839e-39	6.96962e-39
								Ccdc124	0.351177	4.91141e-39	7.32725e-39
								Mrps18c	0.423969	5.71362e-39	8.51205e-39
								Hnrnpf	0.410129	5.98588e-39	8.91137e-39
								Ppp1ca	0.432452	6.26058e-39	9.31378e-39
								Wbp4	0.3861	8.23016e-39	1.22181e-38
								Plin3	0.353102	9.86876e-39	1.46404e-38
								Eif4g2	0.588017	1.14403e-38	1.69599e-38
								Arhgdia	0.326973	1.20194e-38	1.77934e-38
								Mbnl2	0.400356	1.21537e-38	1.79797e-38
								Ssb	0.506174	1.69843e-38	2.50732e-38
								Ndufb6	0.468421	1.71838e-38	2.53499e-38
								Ank	0.960455	2.58165e-38	3.80321e-38
								Gabarap	0.373691	4.15811e-38	6.1001e-38
								Pafah1b1	0.351997	4.29611e-38	6.29819e-38
								Atp5h	0.457985	4.45818e-38	6.53125e-38
								Mrps25	0.41503	4.91815e-38	7.20012e-38
								Dusp10	0.331553	5.69079e-38	8.31398e-38
								Ndufv3	0.498458	6.68306e-38	9.7569e-38
								Atg5	0.403865	6.98924e-38	1.01898e-37
								Tomm20	0.471694	8.45119e-38	1.23043e-37
								Ube2k	0.40858	8.92347e-38	1.29829e-37
								Baiap2	0.323696	9.53817e-38	1.38677e-37
								Snrnp70	0.384624	1.12295e-37	1.63044e-37
								Cript	0.415079	1.42712e-37	2.06923e-37
								Coq7	0.361979	2.34041e-37	3.39111e-37
								Psmd14	0.360784	2.51466e-37	3.6411e-37
								Papola	0.386533	3.76881e-37	5.43469e-37
								Fam104a	0.378707	4.15077e-37	5.97733e-37
								Ssu72	0.362565	4.22983e-37	6.08704e-37
								Rmnd5a	0.382073	4.41362e-37	6.3472e-37
								Pabpc1	0.42925	6.35322e-37	9.11792e-37
								Rasd1	0.537393	6.9094e-37	9.90941e-37
								Zfp260	0.332769	8.29378e-37	1.18788e-36
								Arpc1a	0.387092	8.38883e-37	1.20068e-36
								Nbdy	0.478072	9.58998e-37	1.37074e-36
								Ar	0.385946	1.07311e-36	1.53281e-36
								Smdt1	0.425949	1.31415e-36	1.87331e-36
								Ahsa1	0.397217	1.42772e-36	2.03245e-36
								Mrpl20	0.416796	1.64319e-36	2.33605e-36
								Snx3	0.419737	1.75019e-36	2.48316e-36
								Cetn2	0.356525	2.03557e-36	2.88611e-36
								Golgb1	0.398676	5.08842e-36	7.18565e-36
								Vps36	0.38283	5.53076e-36	7.79468e-36
								Akr1b10	0.349777	6.25146e-36	8.79866e-36
								Sugt1	0.380095	6.82874e-36	9.60476e-36
								Tmem64	0.333318	6.84298e-36	9.61839e-36
								Efna1	0.338938	7.38475e-36	1.0373e-35
								Med8	0.367008	7.96251e-36	1.11697e-35
								Mrpl51	0.38495	8.609e-36	1.20606e-35
								Luc7l3	0.417114	1.00686e-35	1.40961e-35
								Atp6v0b	0.429016	1.04965e-35	1.46854e-35
								Clic4	0.387189	1.10599e-35	1.54532e-35
								Pdcd5	0.366186	1.68579e-35	2.34921e-35
								Plekhj1	0.370258	1.72095e-35	2.39664e-35
								Commd7	0.33083	1.90083e-35	2.64539e-35
								Smim20	0.332165	1.94708e-35	2.70798e-35
								9130008F23Rik	0.422133	1.99198e-35	2.7686e-35
								Mdp1	0.331653	2.15978e-35	2.99873e-35
								Tpm4	0.322004	2.62926e-35	3.64476e-35
								Cep85	0.369084	2.75479e-35	3.81626e-35
								Tomm22	0.412966	3.17327e-35	4.39024e-35
								Mcl1	0.424198	4.93834e-35	6.81439e-35
								Car2	0.604786	8.50697e-35	1.17005e-34
								Arf6	0.4044	9.48551e-35	1.30295e-34
								Bad	0.329601	1.09109e-34	1.49777e-34
								Usmg5	0.444221	1.16109e-34	1.5918e-34
								Morn2	0.329723	1.2297e-34	1.68258e-34
								Cd63	0.514058	1.23964e-34	1.69509e-34
								Tbcb	0.377909	1.33042e-34	1.81804e-34
								Psmb6	0.452259	1.34027e-34	1.83031e-34
								Ube3a	0.363219	1.87641e-34	2.55753e-34
								Rbm17	0.41154	2.25791e-34	3.07157e-34
								Aimp1	0.426501	2.279e-34	3.09827e-34
								Ndufa10	0.339158	2.33157e-34	3.1677e-34
								Mrpl42	0.471516	2.41871e-34	3.28398e-34
								Psmg4	0.325164	2.65213e-34	3.59859e-34
								Thyn1	0.356669	2.88912e-34	3.91764e-34
								Mrps36	0.391653	2.90125e-34	3.93156e-34
								Sf3b5	0.406861	4.07509e-34	5.50814e-34
								Supt4a	0.397064	4.32088e-34	5.83663e-34
								Rabggtb	0.396665	5.59163e-34	7.54353e-34
								Ndufb9	0.431495	5.79066e-34	7.80704e-34
								Elof1	0.327572	6.48102e-34	8.73223e-34
								Eif4e	0.418398	7.0005e-34	9.42015e-34
								Clint1	0.394093	9.18379e-34	1.23345e-33
								Gm16286	0.336302	9.57406e-34	1.28424e-33
								Cisd1	0.40765	1.20687e-33	1.6168e-33
								Gabarapl2	0.384873	1.21518e-33	1.62691e-33
								Lsm6	0.344615	1.36241e-33	1.82057e-33
								Hnrnpa3	0.436355	1.48227e-33	1.97948e-33
								Spop	0.359289	1.82914e-33	2.43962e-33
								Cfap36	0.328693	1.87197e-33	2.4936e-33
								Sept7	0.33199	2.01482e-33	2.68052e-33
								Anapc13	0.428651	2.54925e-33	3.383e-33
								Pdzd11	0.335357	3.45441e-33	4.57845e-33
								Srsf3	0.441841	3.59242e-33	4.75839e-33
								Anxa7	0.333387	3.702e-33	4.90046e-33
								Mapre1	0.362274	3.82155e-33	5.04988e-33
								Mtdh	0.359499	3.88654e-33	5.13189e-33
								Ube2i	0.372977	4.11716e-33	5.42962e-33
								Ndufab1	0.381373	4.23164e-33	5.57711e-33
								Ddx3x	0.529218	4.45791e-33	5.87166e-33
								Raly	0.357701	6.50503e-33	8.53609e-33
								Gm11225	0.373112	8.24335e-33	1.08105e-32
								Hoxb13	0.583617	1.10358e-32	1.44545e-32
								Actr10	0.363293	1.20094e-32	1.572e-32
								Psma5	0.392087	1.26927e-32	1.66042e-32
								Mtfr1l	0.344988	1.51049e-32	1.97475e-32
								Pin1	0.336999	1.70443e-32	2.22693e-32
								Dnajb1	0.517021	1.95278e-32	2.54669e-32
								Ndufb10	0.371538	3.11941e-32	4.05811e-32
								Rtraf	0.467184	5.04711e-32	6.54575e-32
								Cyp51	0.355291	6.88885e-32	8.92343e-32
								Cct4	0.325984	7.7008e-32	9.95687e-32
								Nudc	0.385133	8.21927e-32	1.06207e-31
								Glmp	0.346625	1.38183e-31	1.77905e-31
								Ier2	0.51348	1.61704e-31	2.07933e-31
								Sdcbp	0.370306	1.64866e-31	2.1187e-31
								Ttc1	0.330824	1.79525e-31	2.30429e-31
								BC031181	0.445057	1.84163e-31	2.36238e-31
								Dnase1l2	0.32489	1.93325e-31	2.47691e-31
								Tceal9	0.387796	2.02468e-31	2.59247e-31
								Sod2	0.375456	2.95845e-31	3.78582e-31
								Tspan3	0.395961	3.01406e-31	3.85464e-31
								Cnbp	0.461203	3.20013e-31	4.08519e-31
								Cct5	0.436015	5.38969e-31	6.85961e-31
								Stx12	0.352718	5.81991e-31	7.4027e-31
								Akap9	0.359153	6.01825e-31	7.65038e-31
								G3bp2	0.337042	6.53499e-31	8.29728e-31
								Tgoln1	0.441774	8.33463e-31	1.05569e-30
								Vps29	0.32876	9.79906e-31	1.23992e-30
								Ciao2a	0.402693	9.80087e-31	1.23992e-30
								Mrpl14	0.369489	1.15378e-30	1.45618e-30
								Esd	0.373208	1.43689e-30	1.8124e-30
								Kctd1	0.322179	1.84685e-30	2.32811e-30
								Ranbp1	0.35097	2.44756e-30	3.08168e-30
								Snrpd2	0.366781	2.60723e-30	3.28076e-30
								Eif3e	0.429698	3.02404e-30	3.79847e-30
								Pecam1	0.378614	3.21705e-30	4.03611e-30
								Znhit1	0.355483	3.46527e-30	4.34237e-30
								Mvb12a	0.398759	3.51392e-30	4.40072e-30
								Uqcrb	0.422011	3.57009e-30	4.46842e-30
								Vamp8	0.381447	3.65043e-30	4.56627e-30
								Cisd2	0.329798	3.86594e-30	4.83014e-30
								Mlf2	0.341442	4.41202e-30	5.50916e-30
								Cfdp1	0.425792	4.92787e-30	6.14966e-30
								Cbr1	0.440014	5.52472e-30	6.89042e-30
								Sdhd	0.322364	6.05212e-30	7.54374e-30
								Tra2b	0.404566	6.67579e-30	8.30643e-30
								mt-Co1	0.654267	7.38175e-30	9.17943e-30
								Ninj1	0.360536	7.74433e-30	9.62464e-30
								Hes6	0.364821	8.5773e-30	1.06473e-29
								Psmc6	0.37889	1.05482e-29	1.30785e-29
								Commd3	0.431079	1.40981e-29	1.74188e-29
								Foxa1	0.367469	1.71067e-29	2.10989e-29
								Ctsl	0.591554	2.03688e-29	2.5093e-29
								Ccnl1	0.347679	2.64056e-29	3.24921e-29
								Eif3g	0.385619	2.73136e-29	3.35703e-29
								Mrpl34	0.364046	2.95813e-29	3.63152e-29
								Morf4l2	0.363986	3.10155e-29	3.80318e-29
								Commd1	0.373229	3.48764e-29	4.27413e-29
								Knop1	0.340789	3.55154e-29	4.34992e-29
								Nudt14	0.3407	4.14883e-29	5.07559e-29
								Gnb1	0.330955	4.60256e-29	5.62742e-29
								Psmc2	0.341987	5.48529e-29	6.70284e-29
								Mapk13	0.354918	6.23559e-29	7.61087e-29
								Txnip	0.394876	6.25001e-29	7.62407e-29
								Laptm4a	0.398278	6.85706e-29	8.35976e-29
								Denr	0.336274	7.4704e-29	9.10227e-29
								Ndufb8	0.363839	7.84471e-29	9.55284e-29
								Nfix	0.38079	7.92707e-29	9.64756e-29
								Grpel1	0.419515	8.91489e-29	1.08435e-28
								Ppig	0.352149	9.02463e-29	1.09707e-28
								Prelid3b	0.401673	9.294e-29	1.12917e-28
								Eif2s3y	0.324796	1.04648e-28	1.27068e-28
								Scd1	0.365046	1.33232e-28	1.61684e-28
								Fosb	0.862258	1.47049e-28	1.78348e-28
								Cnih1	0.399232	2.31142e-28	2.79859e-28
								Cycs	0.437409	2.70139e-28	3.26701e-28
								Slc9a2	0.470473	3.09019e-28	3.72869e-28
								Ralbp1	0.348942	3.29458e-28	3.97304e-28
								mt-Nd1	0.545879	3.5802e-28	4.31502e-28
								Ndufb11	0.397976	4.3173e-28	5.20044e-28
								Ppp1r11	0.346336	4.75335e-28	5.71918e-28
								Serpinb6a	0.473594	5.39126e-28	6.47563e-28
								Gtpbp4	0.363825	6.16032e-28	7.39519e-28
								Upf3b	0.347567	6.17517e-28	7.4088e-28
								Bcap31	0.365931	6.70999e-28	8.0459e-28
								Ndufb7	0.371276	7.18633e-28	8.6073e-28
								C1qbp	0.385419	7.23256e-28	8.65778e-28
								Syf2	0.386867	7.32471e-28	8.76312e-28
								Sf3b6	0.349231	8.23985e-28	9.8524e-28
								Scd2	0.689593	1.11821e-27	1.33554e-27
								Ube2n	0.384548	1.34367e-27	1.60209e-27
								Zc3h15	0.321972	1.42113e-27	1.6935e-27
								Krt15	0.483955	1.74468e-27	2.07439e-27
								mt-Nd2	0.518491	1.90803e-27	2.26606e-27
								Naxe	0.39328	2.18097e-27	2.5873e-27
								Cdk4	0.328455	2.27972e-27	2.70293e-27
								Tmbim4	0.348111	2.80302e-27	3.31594e-27
								Fdft1	0.336353	2.8367e-27	3.3539e-27
								Thoc7	0.346118	3.19289e-27	3.76661e-27
								Etf1	0.336413	4.00239e-27	4.71893e-27
								Spin2g	0.328453	4.45036e-27	5.24418e-27
								Pole3	0.337335	5.55605e-27	6.5289e-27
								Psmb5	0.450898	8.71528e-27	1.02129e-26
								Ndufa5	0.402449	1.03367e-26	1.21062e-26
								Mdh1	0.405883	1.13797e-26	1.33057e-26
								Rex1bd	0.364959	1.23021e-26	1.43749e-26
								Taf13	0.33295	1.23078e-26	1.43749e-26
								Hint2	0.347153	1.27478e-26	1.48807e-26
								Jun	0.419439	1.32872e-26	1.54932e-26
								Mat2a	0.609368	1.36903e-26	1.59544e-26
								Psmd12	0.339256	1.42239e-26	1.65671e-26
								Eif5	0.347385	1.55017e-26	1.80454e-26
								Eif2b1	0.332071	2.32797e-26	2.70403e-26
								Egr1	0.675196	2.64192e-26	3.06196e-26
								Prmt1	0.364826	3.20604e-26	3.71374e-26
								Eif3a	0.329591	3.26875e-26	3.7843e-26
								Glrx2	0.346489	4.0999e-26	4.73876e-26
								Dpy30	0.357708	4.11577e-26	4.75191e-26
								Scand1	0.368217	4.57615e-26	5.28055e-26
								Ppa1	0.351452	5.32465e-26	6.13422e-26
								Ip6k2	0.327651	5.69068e-26	6.55235e-26
								Oser1	0.366949	7.79949e-26	8.96581e-26
								Eloc	0.343266	8.01056e-26	9.20343e-26
								Cct7	0.359716	8.0303e-26	9.2211e-26
								Brd2	0.39751	8.31301e-26	9.53538e-26
								Polr3k	0.359644	8.72988e-26	1.00081e-25
								Son	0.44917	9.20717e-26	1.05496e-25
								Atg101	0.324222	9.30193e-26	1.06524e-25
								Dusp1	0.526891	9.3618e-26	1.07151e-25
								Psma3	0.379819	1.02652e-25	1.17428e-25
								Cbr2	0.573305	1.2173e-25	1.39102e-25
								Tmem234	0.365507	1.27752e-25	1.45825e-25
								Sumo3	0.3411	1.38736e-25	1.58277e-25
								Sarnp	0.346725	1.49799e-25	1.70714e-25
								Mpc2	0.331318	1.562e-25	1.77913e-25
								Adh5	0.366131	1.65418e-25	1.88311e-25
								Arl4a	0.413855	2.10859e-25	2.39783e-25
								Rsl1d1	0.333724	2.60975e-25	2.96614e-25
								mt-Nd5	0.410537	2.74923e-25	3.12298e-25
								Arl1	0.376714	6.12707e-25	6.94884e-25
								Eif3k	0.344611	8.70268e-25	9.84875e-25
								Snf8	0.347989	1.04732e-24	1.18398e-24
								Mpc1	0.374423	1.07447e-24	1.21401e-24
								Gstk1	0.380585	1.20709e-24	1.36314e-24
								Mien1	0.356738	1.53722e-24	1.73409e-24
								Rpl30	0.358797	2.22482e-24	2.50174e-24
								Mrpl36	0.326709	2.7066e-24	3.04187e-24
								Eef1d	0.335051	4.08337e-24	4.58187e-24
								Emg1	0.337231	4.09737e-24	4.59514e-24
								Nans	0.414963	5.84499e-24	6.54119e-24
								Atp5g1	0.397664	1.0131e-23	1.13197e-23
								Trmt10a	0.340024	1.05003e-23	1.17262e-23
								Tmem205	0.354327	1.32255e-23	1.47384e-23
								Slc38a2	0.375808	1.80932e-23	2.01523e-23
								Mrps24	0.348722	6.24898e-23	6.92366e-23
								Atp1b1	0.341729	6.31852e-23	6.99704e-23
								Psmc1	0.322025	1.41066e-22	1.55807e-22
								Psmc4	0.359526	1.75489e-22	1.93523e-22
								Eif2s2	0.346051	2.52253e-22	2.77886e-22
								Atraid	0.361701	2.61993e-22	2.88315e-22
								Mrps21	0.349549	3.55782e-22	3.9112e-22
								Scp2	0.350359	5.34471e-22	5.85729e-22
								Echs1	0.362565	7.40866e-22	8.10658e-22
								Mrpl57	0.339549	9.11649e-22	9.96498e-22
								Fos	0.588638	1.04137e-21	1.13771e-21
								5330417C22Rik	0.429952	4.8872e-21	5.30911e-21
								Sec62	0.343962	9.1618e-21	9.93234e-21
								Pdrg1	0.340744	9.87062e-21	1.06953e-20
								1500011B03Rik	0.359931	1.26833e-20	1.37148e-20
								P4hb	0.407822	1.49846e-20	1.61867e-20
								Imp3	0.360366	1.67908e-20	1.81286e-20
								Ier3ip1	0.325994	2.39246e-20	2.58044e-20
								Nt5c3	0.39704	3.74782e-20	4.03406e-20
								Piezo2	0.440248	9.95803e-20	1.06697e-19
								Ndufs7	0.343941	1.20834e-19	1.29404e-19
								Rer1	0.335349	1.63066e-19	1.74455e-19
								Psmb7	0.38293	3.21216e-19	3.42782e-19
								Msrb1	0.353475	2.12842e-18	2.25425e-18
								Eif3m	0.424987	2.41298e-18	2.55307e-18
								Rexo2	0.353507	2.70514e-18	2.86077e-18
								Sgpp1	0.403625	3.47713e-18	3.67349e-18
								Sumo2	0.339113	7.02345e-18	7.40159e-18
								Apof	0.50168	3.85691e-17	4.05445e-17
								Junb	0.35682	4.74557e-17	4.98368e-17
								Hacd2	0.378172	2.13121e-16	2.22708e-16
								Rnf130	0.363926	2.36278e-15	2.45813e-15
								Saa3	0.979161	1.21182e-14	1.25639e-14
								Lurap1l	0.330894	2.28022e-13	2.35255e-13
								Ufm1	0.359536	8.08501e-13	8.32523e-13
								Sdc4	0.480506	9.12127e-13	9.37858e-13
								Mlph	0.326846	1.66144e-11	1.70004e-11
								Snhg11	0.336041	3.4161e-11	3.49209e-11
								Crabp1	1.02363	1.39936e-09	1.42361e-09
								Fam25c	0.496871	4.73065e-09	4.80797e-09
								Slc12a2	0.358772	7.0457e-08	7.14028e-08
								Hbb-bs	1.04946	1.0893e-07	1.10339e-07
								Ly6e	0.854799	0.000928636	0.000933938

## Sheet: S1E Cell Cycle
		WT
Cell Type	Cell Subtype	G1	G2/M	S	Total no of cells	% of G1 cells	% of G2/M cells	% of S cells
Basal	Basal	848	683	1251	2782	30.4817	24.5507	44.9676
Intermediate	Intermediate	499	131	256	886	56.3205	14.7856	28.8939
Differentiated	Differentiated	3913	728	985	5626	69.5521	12.9399	17.508
Endothelial	Endothelial	56	41	63	160	35	25.625	39.375
Fibroblasts	Fibroblasts	967	289	727	1983	48.7645	14.5739	36.6616
Stroma	Stromal	212	89	259	560	37.8571	15.8929	46.25
B-cells	B-cells	48	15	37	100	48	15	37
T cells	CD8	22	18	25	65	33.8462	27.6923	38.4615
T cells	NKT	46	40	64	150	30.6667	26.6667	42.6667
T cells	Delta-Gamma	20	12	18	50	40	24	36
Neutrophils	MDSC	0	0	0	0	0	0	0
Dendritic cells	Dendritic cells	93	53	68	214	43.4579	24.7664	31.7757
Macrophages	M2	64	25	49	138	46.3768	18.1159	35.5072
Macrophages	TAM	43	16	23	82	52.439	19.5122	28.0488
Macrophages	TRM	184	61	112	357	51.5406	17.0868	31.3725
		Pten
Cell Type	Cell Subtype	G1	G2/M	S	Total no of cells	% of G1 cells	% of G2/M cells	% of S cells
Basal	Basal	685	441	669	1795	38.1616	24.5682	37.2702
Intermediate	Intermediate	1555	274	562	2391	65.0355	11.4596	23.5048
Differentiated	Differentiated	1239	214	275	1728	71.7014	12.3843	15.9144
Endothelial	Endothelial	47	19	55	121	38.843	15.7025	45.4545
Fibroblasts	Fibroblasts	603	97	327	1027	58.7147	9.44499	31.8403
Stroma	Stromal	165	28	111	304	54.2763	9.21053	36.5132
B-cells	B-cells	46	26	69	141	32.6241	18.4397	48.9362
T cells	CD8	148	168	341	657	22.5266	25.5708	51.9026
T cells	NKT	50	34	79	163	30.6748	20.8589	48.4663
T cells	Delta-Gamma	42	24	42	108	38.8889	22.2222	38.8889
Neutrophils	MDSC	128	71	56	255	50.1961	27.8431	21.9608
Dendritic cells	Dendritic cells	219	74	133	426	51.4085	17.3709	31.2207
Macrophages	M2	226	36	121	383	59.0078	9.39948	31.5927
Macrophages	TAM	718	190	438	1346	53.3432	14.1159	32.5409
Macrophages	TRM	44	11	26	81	54.321	13.5802	32.0988

## Sheet: S1F basal hypo vs hyper
gene	avg_log2FC	p_val	FDR
Birc5	-2.20608	5.11411e-187	8.3769e-184
Cdca3	-1.78761	4.5575e-166	3.73259e-163
Ube2c	-2.55706	4.10923e-158	2.24364e-155
Pclaf	-2.12556	5.233e-149	2.14291e-146
Pbk	-1.49376	2.68235e-143	8.78738e-141
Stmn1	-2.46555	1.80318e-142	4.92267e-140
Cdk1	-1.59147	1.5087e-135	3.53035e-133
Cdca8	-1.29697	3.88379e-132	7.95205e-130
Cenpa	-1.8646	2.1111e-131	3.8422e-129
Top2a	-1.61864	3.42949e-130	5.6175e-128
Mki67	-1.27591	4.11783e-130	6.13182e-128
Cenpw	-1.40956	1.60669e-129	2.19313e-127
Ccnb2	-1.49655	1.43876e-128	1.81283e-126
Smc2	-1.23808	3.59288e-127	4.20367e-125
Cenpm	-1.34177	6.05425e-118	6.61124e-116
Cdc20	-1.5579	6.51168e-114	6.66633e-112
H2afz	-1.67923	7.27899e-112	7.01353e-110
Ccna2	-0.991353	6.75497e-109	6.14702e-107
Nusap1	-1.09084	8.53842e-108	7.36102e-106
Rrm2	-1.63146	1.78367e-100	1.46083e-98
Tyms	-1.27956	1.23368e-99	9.6227e-98
Cenpf	-1.20516	4.49544e-95	3.34706e-93
Sfn	1.73179	2.69122e-88	1.91662e-86
Cdkn3	-1.23655	5.23312e-88	3.5716e-86
Spc25	-0.905979	2.18699e-87	1.43292e-85
Cks1b	-1.52518	1.4619e-86	9.20997e-85
Hmgb2	-1.89545	2.18171e-86	1.32357e-84
Racgap1	-1.05495	1.22017e-85	7.13801e-84
Knstrn	-0.910785	1.8048e-85	1.0194e-83
Cenpe	-0.637176	5.48598e-85	2.99535e-83
Ptma	-0.964277	6.55195e-85	3.46197e-83
Tpx2	-0.775299	2.5963e-84	1.32898e-82
Ccnb1	-1.07786	2.4834e-82	1.23267e-80
Ccdc34	-1.46215	5.99177e-81	2.88662e-79
Lig1	-1.11801	3.99488e-77	1.8696e-75
Aurkb	-0.705641	4.84641e-77	2.20512e-75
H2afx	-1.36292	5.36248e-77	2.37399e-75
Tubb5	-1.69295	3.95558e-76	1.70506e-74
Chchd10	-1.57537	2.05613e-75	8.63575e-74
Tk1	-1.04966	8.00345e-75	3.27741e-73
Tspan13	-1.43209	1.41833e-74	5.66639e-73
Asf1b	-0.627771	2.98663e-74	1.16479e-72
Gmnn	-0.792091	3.82491e-73	1.45702e-71
Mcm5	-0.825832	4.0419e-73	1.50469e-71
Smc4	-1.2477	6.45262e-73	2.34875e-71
Spc24	-0.997163	8.85612e-72	3.15355e-70
Selenoh	-1.32524	4.69714e-69	1.637e-67
Oit1	-1.89899	5.71567e-69	1.95047e-67
Tuba1b	-1.71997	6.00036e-68	2.00584e-66
Agr2	-1.60194	4.1933e-66	1.37372e-64
Cmc2	-0.921553	1.32768e-65	4.2642e-64
Pmf1	-0.919938	1.52047e-65	4.78949e-64
Hmmr	-0.53299	4.0077e-65	1.23861e-63
Ncaph	-0.525164	4.27806e-65	1.29768e-63
Plk1	-0.656747	4.97288e-65	1.48101e-63
Cldn3	-1.47533	9.28098e-65	2.71469e-63
Fam111a	-0.618083	7.77151e-64	2.23329e-62
Tacc3	-0.628515	9.94564e-64	2.80879e-62
Rfc5	-0.759966	1.40609e-61	3.90368e-60
Rad51	-0.484682	5.05308e-61	1.37949e-59
Rps27	0.961062	5.56273e-61	1.49373e-59
Incenp	-0.636778	1.23071e-60	3.25146e-59
Mad2l1	-0.724496	4.3011e-60	1.11829e-58
Tcf19	-0.612248	8.9993e-60	2.30326e-58
Tspan1	-2.27362	1.56997e-59	3.95632e-58
Hells	-0.797144	1.67584e-59	4.15914e-58
Dnajc9	-0.766741	1.82895e-58	4.47138e-57
Uhrf1	-0.561396	3.10394e-58	7.47683e-57
Cyp51	-0.914871	3.64277e-58	8.64763e-57
Ckap2l	-0.422729	2.88307e-57	6.74638e-56
Kif22	-0.525111	6.69575e-57	1.54474e-55
Ska1	-0.469024	2.31685e-56	5.27083e-55
Bspry	-0.841739	7.79272e-56	1.74856e-54
Diaph3	-0.463641	1.05412e-55	2.33332e-54
Mis18a	-0.669271	3.57598e-55	7.80994e-54
Map1lc3a	1.1529	3.85481e-55	8.30813e-54
H1fx	-0.523449	4.56821e-55	9.71784e-54
Hist1h2ap	-0.571337	9.38202e-55	1.97022e-53
Tnfrsf12a	1.13967	9.91008e-55	2.05477e-53
Idi1	-0.752408	1.35382e-54	2.77194e-53
Kif4	-0.312735	2.11356e-54	4.27409e-53
Krt14	1.59579	3.36679e-53	6.72536e-52
Apoe	2.12445	5.25401e-53	1.03688e-51
Dctpp1	-0.926736	7.6276e-53	1.48738e-51
Ugt2b34	-0.740547	1.77523e-52	3.42097e-51
Mcm6	-0.784416	5.4718e-52	1.04219e-50
Aurka	-0.721712	1.14663e-51	2.15883e-50
Ncapd2	-0.44654	1.78149e-51	3.316e-50
Cldn10	-1.01944	3.42239e-51	6.29874e-50
Anln	-0.454687	5.19518e-51	9.45522e-50
Nucks1	-1.05689	1.35693e-50	2.44247e-49
Mcm3	-0.479388	1.85875e-50	3.30939e-49
Cip2a	-0.455206	2.2886e-50	4.0309e-49
Rrm1	-0.858494	2.40642e-50	4.19332e-49
Tmem54	-0.715485	4.63745e-50	7.99594e-49
Fam174b	-0.531138	4.76708e-50	8.13383e-49
Cdca5	-0.407068	4.84426e-50	8.18031e-49
Ect2	-0.377948	1.71406e-49	2.86493e-48
Uqcr10	-1.01787	2.37038e-49	3.9219e-48
Rpl18a	0.703991	2.42335e-49	3.96945e-48
Ppp1r1b	-1.15602	2.37497e-48	3.85168e-47
Ran	-1.00011	6.49708e-48	1.04335e-46
Cenph	-0.517378	9.44492e-48	1.50202e-46
Mrpl18	-1.0292	2.01388e-47	3.17186e-46
Nrm	-0.680113	2.53654e-47	3.95699e-46
Lgals7	1.1055	2.64359e-47	4.08509e-46
Cep55	-0.291557	4.09797e-47	6.27335e-46
Cystm1	-1.62309	4.38327e-47	6.64795e-46
Prc1	-0.568732	1.03337e-46	1.55291e-45
Rps14	0.471618	1.88171e-46	2.80204e-45
Cmas	-1.05625	2.14693e-46	3.16817e-45
Ncapg2	-0.365365	4.88413e-46	7.14304e-45
Sgo1	-0.614186	1.08743e-45	1.57629e-44
Dcn	1.58977	2.98648e-45	4.2911e-44
Chaf1b	-0.53509	3.01683e-45	4.29702e-44
Lmnb1	-0.681262	7.2419e-45	1.02261e-43
Cenpk	-0.483425	7.31668e-45	1.02433e-43
Dhfr	-0.455339	8.98833e-45	1.2477e-43
Arg1	-0.820627	1.04186e-44	1.43409e-43
Igfbp5	1.78576	1.37681e-44	1.87934e-43
Dut	-1.0746	3.25353e-44	4.40437e-43
Nek2	-0.349818	3.59581e-44	4.82782e-43
Ckap2	-0.434598	4.35709e-44	5.80237e-43
Hist1h4i	-0.598087	7.84745e-44	1.03662e-42
Pgp	-1.02291	1.65299e-43	2.16608e-42
Fen1	-0.481274	4.28352e-43	5.56858e-42
Gchfr	-0.807393	5.83643e-43	7.52762e-42
Rad51ap1	-0.313413	8.40813e-43	1.07598e-41
Tmprss4	-0.562405	1.00196e-42	1.27226e-41
Kif11	-0.372771	1.39379e-42	1.75617e-41
Pimreg	-0.480576	9.87692e-42	1.23499e-40
Hmgn2	-0.790553	1.27225e-41	1.57875e-40
Pttg1	-0.944908	1.38902e-41	1.71069e-40
Acat2	-0.591051	2.03974e-41	2.49335e-40
Hat1	-0.638368	2.88046e-41	3.49496e-40
Dek	-0.979461	3.00981e-41	3.62505e-40
Serpinb1a	-0.785919	3.13356e-41	3.74655e-40
Fabp5	-2.12426	3.36368e-41	3.99254e-40
Ube2t	-0.468154	3.73825e-41	4.40521e-40
Melk	-0.368034	5.55851e-41	6.50346e-40
Cit	-0.320317	6.89279e-41	8.00737e-40
Mrps25	-0.87509	7.39027e-41	8.52484e-40
Mxd3	-0.370485	9.86344e-41	1.12981e-39
Fgfbp1	-1.02038	1.82216e-40	2.0727e-39
Pcna	-0.923617	2.03537e-40	2.29926e-39
Cstb	0.980862	2.34896e-40	2.63534e-39
Nuf2	-0.26868	2.73675e-40	3.04952e-39
Rps19	0.488446	2.90868e-40	3.2192e-39
Krt17	1.72502	4.21777e-40	4.63671e-39
Tipin	-0.617896	4.65918e-40	5.08782e-39
Cks2	-1.22178	8.28848e-40	8.99108e-39
Usp1	-0.503245	9.93035e-40	1.07013e-38
Tpt1	0.439193	1.07716e-39	1.1532e-38
Cenps	-0.396772	2.61019e-39	2.77629e-38
Cmtm8	-0.474388	4.7333e-39	5.00203e-38
Tpm1	0.892302	4.89777e-39	5.14266e-38
Rnaseh2c	-0.866624	5.87508e-39	6.12955e-38
Esco2	-0.781706	6.91275e-39	7.16651e-38
Hbegf	1.3373	9.4201e-39	9.70448e-38
Lsm3	-0.743124	1.39905e-38	1.43228e-37
Nhp2	-1.03807	2.38248e-38	2.42391e-37
5330417C22Rik	-0.495554	3.11581e-38	3.15043e-37
Anp32e	-0.668277	4.51319e-38	4.53534e-37
Sdc4	1.09987	5.13127e-38	5.12501e-37
Bub1	-0.388789	5.1808e-38	5.14312e-37
Mcm7	-0.585006	6.35014e-38	6.26598e-37
Cdkn2d	-0.758345	8.72021e-38	8.55312e-37
Mns1	-0.398474	9.32914e-38	9.09591e-37
Haus4	-0.583749	2.44408e-37	2.36887e-36
Mcm4	-0.380527	2.63313e-37	2.5371e-36
Snhg11	1.02836	2.68336e-37	2.57038e-36
Gpsm2	-0.314092	2.74384e-37	2.61303e-36
Fdps	-0.858787	3.33612e-37	3.15871e-36
Slc5a8	-0.41373	3.44258e-37	3.24077e-36
Mcm2	-0.456488	3.56065e-37	3.33276e-36
Slc25a10	-0.424636	4.05542e-37	3.7743e-36
Ndufa4	-0.894566	4.2605e-37	3.94277e-36
Zfp367	-0.301048	5.9364e-37	5.46283e-36
Fkbp2	-0.961563	7.31728e-37	6.69593e-36
Kif23	-0.449981	8.25006e-37	7.50755e-36
Cyb5b	-0.737463	8.89834e-37	8.05275e-36
Foxm1	-0.251733	9.42052e-37	8.45086e-36
Ndc1	-0.254268	9.44144e-37	8.45086e-36
H2-Q7	-0.993123	9.60553e-37	8.55101e-36
Myl12a	0.804156	1.28778e-36	1.14021e-35
Hpf1	-0.632809	2.93938e-36	2.58855e-35
Gmds	-0.84295	3.86445e-36	3.38501e-35
Gdpd1	-0.598277	3.95892e-36	3.44931e-35
Kif20b	-0.303917	4.04613e-36	3.50664e-35
Ppia	-0.655053	4.39218e-36	3.78653e-35
Arhgap11a	-0.330724	4.59923e-36	3.94427e-35
Rpa2	-0.384528	5.25274e-36	4.48125e-35
Nans	-1.1157	6.37146e-36	5.40748e-35
Ebp	-0.584062	6.86816e-36	5.79899e-35
Pigr	-2.34288	6.95242e-36	5.84003e-35
S100a10	0.806862	9.81184e-36	8.19989e-35
Cenpv	-0.406765	1.15946e-35	9.6406e-35
Rpl37a	0.43707	1.6886e-35	1.39693e-34
Tmem97	-0.472256	2.8812e-35	2.37156e-34
Kifc1	-0.357981	2.98635e-35	2.44582e-34
Hint1	-0.675628	3.29153e-35	2.68235e-34
Dtymk	-0.92014	3.53247e-35	2.86445e-34
Spns2	-0.35172	3.55523e-35	2.8687e-34
Slc38a1	-0.541558	4.42401e-35	3.55222e-34
S100a6	0.836251	6.90521e-35	5.51743e-34
Ranbp1	-1.00583	1.62396e-34	1.29128e-33
Myo5c	-0.324847	2.97563e-34	2.35463e-33
Sec11c	-1.09614	3.56251e-34	2.80547e-33
Lrg1	-1.18692	5.05129e-34	3.95886e-33
Ltbp1	1.23659	5.45981e-34	4.25865e-33
Tspan8	-1.0002	6.19392e-34	4.80836e-33
Ezh2	-0.747039	8.46875e-34	6.54331e-33
Atp5g3	-0.818425	1.06637e-33	8.20052e-33
Syce2	-0.444723	1.76799e-33	1.35325e-32
Hist1h1b	-0.348156	2.23674e-33	1.70408e-32
Kif2c	-0.272852	2.34054e-33	1.77491e-32
Tst	-0.730786	2.4238e-33	1.82958e-32
Bub1b	-0.266974	2.44914e-33	1.84022e-32
Cxcl17	-1.35973	2.97858e-33	2.22782e-32
Lsm5	-0.82109	3.21499e-33	2.39371e-32
Calm3	-0.902385	3.73458e-33	2.76798e-32
Depdc1a	-0.273393	8.93765e-33	6.59454e-32
Prim1	-0.365725	9.8644e-33	7.24569e-32
Pold2	-0.338834	1.34577e-32	9.84093e-32
Dhcr24	-0.416827	1.53937e-32	1.12066e-31
Atad2	-0.416197	1.78455e-32	1.2934e-31
Banf1	-0.77766	1.9407e-32	1.40038e-31
Rps27l	-0.711147	2.22585e-32	1.5991e-31
Clspn	-0.263011	2.36403e-32	1.69095e-31
Sf3b5	-0.874425	3.15564e-32	2.24736e-31
Cox5a	-0.886195	3.29348e-32	2.33537e-31
Igfbp7	1.21453	4.84474e-32	3.42055e-31
Pglyrp1	-1.83052	5.08469e-32	3.57456e-31
Cenpq	-0.343726	5.20263e-32	3.64184e-31
H2afv	-0.968102	5.58696e-32	3.89423e-31
Car2	-1.34873	7.03239e-32	4.88096e-31
Ube2s	-0.925536	7.23493e-32	5.00034e-31
Tubb4b	-1.48158	7.7189e-32	5.31242e-31
Sae1	-0.923442	1.03176e-31	7.07121e-31
Sdf2l1	-0.71844	1.12352e-31	7.66801e-31
Rpl26	0.403762	1.29671e-31	8.81335e-31
Oas2	-0.304332	1.41353e-31	9.56762e-31
Coq7	-0.590525	1.72863e-31	1.16522e-30
Prom1	-0.684756	2.14252e-31	1.4383e-30
Sec61b	-0.785952	2.30254e-31	1.53941e-30
Qsox1	-1.04593	4.14936e-31	2.76286e-30
Lrrc26	-0.395891	4.51027e-31	2.99102e-30
Tmem238	-0.809339	4.91044e-31	3.24327e-30
Mast4	1.16184	6.34963e-31	4.17699e-30
Gipc2	-0.581339	7.54584e-31	4.94404e-30
Gm9973	1.35335	1.01207e-30	6.60468e-30
Slc39a8	-1.21665	1.1149e-30	7.24684e-30
Gemin6	-0.44795	1.19731e-30	7.75174e-30
Abo	-0.477345	1.42838e-30	9.21135e-30
Slfn9	-0.526199	1.46409e-30	9.3996e-30
Tfdp1	-0.608033	1.46905e-30	9.3996e-30
Iqgap3	-0.270035	1.82268e-30	1.16169e-29
Atp5g1	-0.75843	2.01753e-30	1.27851e-29
Nupr1	-1.83335	2.02158e-30	1.27851e-29
Uqcrq	-0.750482	4.63689e-30	2.92124e-29
Cdkn2c	-0.402142	5.68083e-30	3.56521e-29
Mrpl49	-0.41838	6.29023e-30	3.93259e-29
Cited1	-0.588972	8.72908e-30	5.43659e-29
Stard4	-0.365319	9.71692e-30	6.02891e-29
Ppih	-0.50111	1.09487e-29	6.76751e-29
Apof	-0.604061	1.10245e-29	6.78874e-29
Timp4	-0.564671	1.39013e-29	8.5282e-29
Rpl37	0.437437	1.40714e-29	8.60037e-29
Uchl5	-0.592939	1.75219e-29	1.06695e-28
Ssrp1	-0.633129	1.77919e-29	1.07938e-28
Snrnp25	-0.448382	2.28093e-29	1.37866e-28
Ppil1	-0.535684	2.41378e-29	1.45359e-28
Homer2	-0.332477	3.5286e-29	2.11716e-28
H2-Q6	-0.448569	3.94314e-29	2.35725e-28
Crabp1	-1.41138	4.42191e-29	2.63385e-28
Tmsb4x	0.605723	6.10113e-29	3.62089e-28
Slc25a5	-0.881221	6.15567e-29	3.64007e-28
5430419D17Rik	-1.01635	1.44958e-28	8.54108e-28
Pa2g4	-0.845712	1.52636e-28	8.96118e-28
Ceacam1	-0.974063	1.67884e-28	9.82121e-28
Wfdc18	-2.56247	1.7172e-28	1.00099e-27
Fdft1	-0.599139	1.99887e-28	1.16104e-27
Rps28	0.411311	2.08385e-28	1.20613e-27
Vrk1	-0.389447	2.20036e-28	1.26908e-27
Rplp0	0.395323	2.42604e-28	1.39433e-27
Ska2	-0.330817	2.52805e-28	1.44788e-27
Jpt1	-0.917955	2.55576e-28	1.45865e-27
Slc35a3	-0.349999	3.56971e-28	2.03027e-27
Hist1h1c	-0.865111	3.77033e-28	2.13695e-27
Krt15	0.855568	4.09065e-28	2.31051e-27
Insig1	-0.567376	4.47849e-28	2.51813e-27
Pop5	-0.618456	4.48897e-28	2.51813e-27
Krt5	0.743822	5.7435e-28	3.21087e-27
Hmgn5	-0.738503	8.2247e-28	4.58233e-27
Cox8a	-0.499645	1.01733e-27	5.64876e-27
Pmvk	-0.453072	1.08886e-27	6.0255e-27
Tubg1	-0.383802	1.34344e-27	7.40926e-27
Phlda1	0.870371	1.62138e-27	8.91216e-27
Hmgb3	-0.665958	1.91537e-27	1.04929e-26
Rpl23	0.367004	2.06178e-27	1.12573e-26
Pla2g16	-0.57755	2.11904e-27	1.15315e-26
H1f0	-0.605379	2.63563e-27	1.42952e-26
Lsm6	-0.709022	2.76426e-27	1.49434e-26
Pole3	-0.572884	2.80755e-27	1.51275e-26
Anxa4	-0.865769	4.03145e-27	2.16509e-26
Rpl34	0.440543	4.49408e-27	2.40565e-26
Palld	1.04925	7.21624e-27	3.85023e-26
Noct	0.79013	8.94592e-27	4.75761e-26
Cox7a2	-0.603119	1.04966e-26	5.54842e-26
Rbp1	0.923288	1.05007e-26	5.54842e-26
Dck	-0.269242	1.05887e-26	5.57694e-26
Ccn1	1.25273	1.08538e-26	5.69827e-26
Psat1	-0.505375	1.224e-26	6.40545e-26
Nme1	-0.797147	1.3647e-26	7.11902e-26
Nsdhl	-0.353352	1.75555e-26	9.12887e-26
Haus1	-0.436479	2.4227e-26	1.25582e-25
Ciao2a	-0.612107	2.87964e-26	1.48797e-25
Dpy30	-0.659276	2.98298e-26	1.53652e-25
Rps3a1	0.431566	3.96524e-26	2.03607e-25
Hspb1	0.877235	4.04594e-26	2.07102e-25
Cmpk1	-0.831628	4.82007e-26	2.45959e-25
Mrpl57	-0.801042	4.96117e-26	2.52373e-25
Ybx1	-0.589791	6.71217e-26	3.40388e-25
Ftl1	0.642705	7.32072e-26	3.70103e-25
Mlph	-0.313266	8.33691e-26	4.2018e-25
Ssna1	-0.617254	9.09938e-26	4.57202e-25
Atp5k	-0.80232	9.42805e-26	4.72267e-25
Rpl32	0.314818	1.03153e-25	5.14703e-25
Snrpe	-0.645696	1.03381e-25	5.14703e-25
Dhrs4	-0.673414	1.0475e-25	5.19941e-25
Dnajc10	-0.706829	1.46426e-25	7.24608e-25
Ptpn18	-0.336983	1.47321e-25	7.26842e-25
Scd1	-0.618091	1.53683e-25	7.55952e-25
Rbm3	-0.657649	1.88686e-25	9.25353e-25
Hspd1	-0.716054	2.30302e-25	1.12607e-24
Psmb9	-0.641714	2.3875e-25	1.16391e-24
Bex3	-0.917602	2.44536e-25	1.18857e-24
Mrpl42	-0.762884	2.68265e-25	1.30005e-24
Bzw2	-0.690402	2.69259e-25	1.30102e-24
Pla2g12a	-0.481512	3.19136e-25	1.53749e-24
Rad21	-0.425889	3.91264e-25	1.87944e-24
Rpl35a	0.375641	5.60701e-25	2.68546e-24
Minos1	-0.742192	6.81305e-25	3.25358e-24
Med9	-0.491927	6.9337e-25	3.30157e-24
Hjurp	-0.323492	7.91893e-25	3.75977e-24
Csrp1	0.930868	8.21064e-25	3.887e-24
Lsm2	-0.674628	1.08235e-24	5.10918e-24
Crb3	-0.600439	1.74025e-24	8.19117e-24
Perp	0.677583	1.89992e-24	8.91712e-24
Mis18bp1	-0.380314	1.99116e-24	9.31865e-24
Prr11	-0.418883	2.40903e-24	1.12421e-23
Rfc1	-0.357381	2.9496e-24	1.37257e-23
Elof1	-0.637157	3.23991e-24	1.50339e-23
Prdx3	-0.482073	3.27844e-24	1.51697e-23
9530002B09Rik	-3.87562	3.68485e-24	1.70022e-23
Olfr1033	1.46689	3.78939e-24	1.74354e-23
Capn5	-0.26682	4.00044e-24	1.8355e-23
Sfr1	0.798066	4.16736e-24	1.90674e-23
Oxct1	-0.924623	4.3764e-24	1.99681e-23
Srsf1	-0.472377	6.96671e-24	3.16985e-23
Acp1	-0.585462	7.04345e-24	3.19589e-23
Lsm4	-0.681806	7.41581e-24	3.35555e-23
F3	1.50317	7.61299e-24	3.43528e-23
Prdx4	-0.624119	8.62126e-24	3.87957e-23
Ak2	-0.451661	8.76313e-24	3.9326e-23
Nsmce4a	-0.559294	8.98391e-24	4.02067e-23
Rhpn2	-0.374809	9.07789e-24	4.05166e-23
Pim1	1.25781	9.1558e-24	4.07533e-23
Alyref	-0.46594	9.5877e-24	4.256e-23
Rps15	0.380734	9.89391e-24	4.38006e-23
Akr1b3	-0.656807	1.10048e-23	4.85871e-23
Fuom	-0.425725	1.30605e-23	5.74875e-23
Xpo1	-0.268402	1.30909e-23	5.74875e-23
Nucb2	-1.1181	1.37351e-23	6.01554e-23
Itpa	-0.411772	1.55218e-23	6.76709e-23
Cdc25c	-0.329052	1.55337e-23	6.76709e-23
Nol7	-0.705205	1.76811e-23	7.67151e-23
Asrgl1	-0.525514	1.77035e-23	7.67151e-23
Tmpo	-0.563883	1.80183e-23	7.78733e-23
Azgp1	-0.576677	1.95841e-23	8.44179e-23
Gjb2	-0.353186	2.11778e-23	9.10479e-23
Dnph1	-0.391966	2.29635e-23	9.84665e-23
Anapc11	-0.586967	2.39917e-23	1.02607e-22
Scd2	-0.971085	2.45631e-23	1.04777e-22
Bola3	-0.560458	2.69312e-23	1.1458e-22
Ptgr1	-0.709737	2.88348e-23	1.22361e-22
Iqgap2	-0.276641	3.02113e-23	1.27871e-22
Bola1	-0.510762	3.35635e-23	1.41693e-22
Rpa3	-0.51821	4.6748e-23	1.96846e-22
Rpl4	0.431634	5.80875e-23	2.43968e-22
Ola1	-0.531597	6.28411e-23	2.63258e-22
Smc1a	-0.521728	7.34976e-23	3.07115e-22
Gins2	-0.341614	7.80349e-23	3.25245e-22
Mme	-0.526066	9.55066e-23	3.97056e-22
P4hb	-0.816364	9.87124e-23	4.09344e-22
Rfc2	-0.673928	1.03677e-22	4.28845e-22
Liph	-0.265955	1.04493e-22	4.31132e-22
Mrpl34	-0.47265	1.0802e-22	4.44563e-22
Gstt3	-0.592196	1.09639e-22	4.50095e-22
Ndufc1	-0.751741	1.25482e-22	5.13849e-22
Mal2	-0.323318	1.35686e-22	5.5425e-22
Mtap	-0.431848	1.40015e-22	5.70508e-22
Dbi	-0.71532	1.78099e-22	7.23885e-22
Cbx5	-0.280742	1.81423e-22	7.35571e-22
Rpl6	0.434061	1.86334e-22	7.53617e-22
Wars	-0.304605	1.88407e-22	7.60126e-22
Tsn	-0.513113	2.23572e-22	8.99783e-22
Dynlt1f	-0.556398	2.30723e-22	9.26284e-22
Rps29	0.311316	2.76529e-22	1.10747e-21
Ndufb7	-0.648619	2.80366e-22	1.1201e-21
Tssc4	-0.367174	2.98448e-22	1.18943e-21
Rpa1	-0.465464	3.43336e-22	1.36501e-21
Gfer	-0.523972	3.58164e-22	1.42051e-21
Hmgb1	-0.704924	4.76873e-22	1.88676e-21
Me2	-0.289267	4.96729e-22	1.96058e-21
Coa3	-0.574835	5.82705e-22	2.2944e-21
Arl6ip1	-0.982851	6.52996e-22	2.56501e-21
Ndufab1	-0.804566	7.11251e-22	2.78715e-21
Mrpl28	-0.534578	8.19178e-22	3.20242e-21
Ifi27l2a	-0.682172	8.65231e-22	3.3744e-21
Rfc4	-0.467966	1.26483e-21	4.92111e-21
Cyb561	-0.431394	1.26935e-21	4.92699e-21
Ttc32	-0.340192	1.47057e-21	5.69453e-21
Selenow	0.63808	1.52429e-21	5.88864e-21
Snrpd1	-0.690788	1.56886e-21	6.04154e-21
Tedc1	-0.276412	1.57124e-21	6.04154e-21
Eif2b1	-0.580632	1.62917e-21	6.24959e-21
Rfc3	-0.432151	1.63619e-21	6.26188e-21
Gpx2	-0.876831	1.72042e-21	6.56889e-21
Poc1a	-0.313426	1.74731e-21	6.65602e-21
Vars	-0.509272	1.89541e-21	7.20345e-21
Errfi1	0.918154	2.0112e-21	7.6258e-21
Cenpx	-0.61899	2.20538e-21	8.34277e-21
Thyn1	-0.422938	2.41106e-21	9.09979e-21
Taldo1	-0.977269	2.50161e-21	9.41987e-21
Tkt	-0.696195	2.58144e-21	9.69817e-21
Gabrp	-0.358635	2.60195e-21	9.75286e-21
Mrps24	-0.716366	2.78473e-21	1.04141e-20
Rpl21	0.352603	3.34215e-21	1.24702e-20
Mpi	-0.534491	3.45255e-21	1.28529e-20
Rnf181	-0.430547	3.49323e-21	1.29749e-20
Cycs	-0.789974	3.6921e-21	1.36825e-20
Psip1	-0.448513	3.78714e-21	1.4003e-20
Acsl5	-0.454983	3.86344e-21	1.4253e-20
Rpl13	0.536228	5.53998e-21	2.03921e-20
Itm2b	0.421237	5.74302e-21	2.10921e-20
Sqor	-0.366188	5.83106e-21	2.13675e-20
Ier3	0.821021	6.07135e-21	2.21984e-20
Maff	1.19224	6.93192e-21	2.52884e-20
Cldn7	-0.679948	7.05346e-21	2.56746e-20
Ube2m	-0.389699	7.51983e-21	2.73094e-20
Gcsh	-0.497058	7.53593e-21	2.73094e-20
Calr	-0.664477	7.73178e-21	2.79573e-20
Gltp	-0.481442	9.01666e-21	3.25315e-20
Gas6	1.06208	9.62448e-21	3.46481e-20
Plaur	1.13469	1.09849e-20	3.9459e-20
Mis12	-0.311351	1.16346e-20	4.17014e-20
Rad18	-0.272488	1.3171e-20	4.71051e-20
Knl1	-0.381691	1.3456e-20	4.80194e-20
Atp5c1	-0.652252	1.38792e-20	4.94221e-20
Actb	0.811473	1.83555e-20	6.52197e-20
Hspa14	-0.324502	1.93367e-20	6.85574e-20
Tpi1	-0.833049	1.94371e-20	6.87646e-20
Orc6	-0.386942	1.98438e-20	7.00521e-20
Pkm	-0.786793	2.07837e-20	7.32124e-20
Slc12a2	-1.2551	2.10952e-20	7.415e-20
Thbs1	0.949843	2.23938e-20	7.8546e-20
Wfdc17	-0.309956	2.25964e-20	7.90872e-20
Sh3bgrl2	-0.358982	3.09767e-20	1.08187e-19
Nudcd2	-0.355457	3.46259e-20	1.20675e-19
Nfkbia	0.92441	3.57378e-20	1.24286e-19
Pmm2	-0.415556	3.85218e-20	1.33684e-19
Dcxr	-0.930436	4.25166e-20	1.47235e-19
Fh1	-0.489889	4.45302e-20	1.53883e-19
Klf6	0.687863	4.92542e-20	1.69849e-19
Nup37	-0.428622	5.41812e-20	1.86447e-19
Srprb	-0.379065	5.46158e-20	1.87549e-19
Prr15l	-0.353023	5.58618e-20	1.91426e-19
Bak1	-0.316557	5.6834e-20	1.94351e-19
Anp32b	-0.758614	6.33299e-20	2.16113e-19
Kpnb1	-0.391861	6.92413e-20	2.35795e-19
Ddt	-0.780944	7.13966e-20	2.4263e-19
Cpe	0.966776	7.62461e-20	2.58574e-19
Rbbp7	-0.701731	8.19611e-20	2.77381e-19
Tmx2	-0.276219	8.63217e-20	2.91536e-19
Rpl19	0.357401	9.09202e-20	3.06435e-19
Lyrm9	-0.297067	9.53209e-20	3.20607e-19
Chchd1	-0.419138	1.00236e-19	3.36449e-19
Cdkn2aipnl	-0.440873	1.01958e-19	3.41527e-19
Polr3k	-0.412806	1.09539e-19	3.66172e-19
Eif2s3x	-0.30471	1.32994e-19	4.43674e-19
Dnajb1	0.970845	1.38706e-19	4.61788e-19
Donson	-0.2643	1.41467e-19	4.70027e-19
Rap2b	1.00946	1.41863e-19	4.70388e-19
Mdh1	-0.758295	1.5635e-19	5.17375e-19
Dynll2	-0.745834	1.63216e-19	5.39007e-19
Ddx39	-0.607222	1.83068e-19	6.03351e-19
Tfrc	-0.306954	1.8678e-19	6.14349e-19
Rpn2	-0.553745	1.87868e-19	6.16688e-19
Rangap1	-0.44972	1.89896e-19	6.22101e-19
Tmem176b	0.859685	1.94307e-19	6.35279e-19
Erg28	-0.544611	1.97893e-19	6.45715e-19
Psmg2	-0.457067	2.0369e-19	6.63307e-19
Ppm1g	-0.508744	2.1208e-19	6.89259e-19
Cox6b1	-0.541842	2.19733e-19	7.12719e-19
H2afj	-0.721616	2.46822e-19	7.99e-19
Idh3a	-0.49133	2.94676e-19	9.5203e-19
Mvd	-0.260587	3.98274e-19	1.2842e-18
Dlgap5	-0.273901	4.06103e-19	1.30687e-18
Rps15a	0.399526	5.8253e-19	1.87095e-18
Ap1m2	-0.286086	6.68235e-19	2.14201e-18
Gapdh	-0.561671	7.41373e-19	2.36868e-18
Hnrnpa2b1	-0.600821	7.41839e-19	2.36868e-18
Tjp3	-0.388323	7.75659e-19	2.47185e-18
Uqcr11	-0.460773	8.85185e-19	2.80996e-18
Fau	0.467633	8.85188e-19	2.80996e-18
Dct	-0.698208	9.11925e-19	2.88923e-18
Cnot9	-0.324228	9.33206e-19	2.95095e-18
Cdca2	-0.251445	9.63818e-19	3.04188e-18
Myef2	-0.294534	9.71648e-19	3.06069e-18
Rps26	0.364147	9.97798e-19	3.13703e-18
Dhrs7b	-0.34075	1.01977e-18	3.19996e-18
Rheb	0.726896	1.0688e-18	3.34742e-18
Ssr1	-0.408324	1.09944e-18	3.4368e-18
Dnajc2	-0.385718	1.24169e-18	3.87343e-18
Cln6	-0.277397	1.24385e-18	3.87343e-18
Junb	0.781198	1.24898e-18	3.88204e-18
Cst3	0.822482	1.26743e-18	3.9319e-18
Mre11a	-0.252127	1.33214e-18	4.12484e-18
Naa10	-0.488509	1.43513e-18	4.43536e-18
Gcat	-0.278968	1.44764e-18	4.46559e-18
Sdha	-0.364742	1.55274e-18	4.78079e-18
Haus8	-0.30024	1.61473e-18	4.96236e-18
Eif4ebp2	-0.355948	1.67768e-18	5.14614e-18
Nap1l1	-0.567786	1.74894e-18	5.35469e-18
Pola1	-0.285856	1.93531e-18	5.91425e-18
Cox7a2l	0.536558	2.05415e-18	6.26573e-18
Pgap2	-1.26144	2.20497e-18	6.71329e-18
H2-K1	-0.875023	2.36923e-18	7.20001e-18
Gstt1	-0.653128	2.37968e-18	7.21837e-18
Cfap298	-0.402426	2.76074e-18	8.35875e-18
Mrpl12	-0.565851	2.95563e-18	8.93233e-18
Top1	0.679208	2.96179e-18	8.93447e-18
Ncaph2	-0.411149	3.09203e-18	9.31019e-18
Gne	-0.422791	3.11536e-18	9.36322e-18
Nubp2	-0.318438	3.20823e-18	9.62468e-18
Dnajc19	-0.561028	3.29803e-18	9.87599e-18
Tceal9	-0.579838	3.32923e-18	9.95124e-18
Cinp	-0.354078	3.4762e-18	1.03716e-17
Trappc1	-0.623894	3.49504e-18	1.04089e-17
Timm50	-0.379706	3.63188e-18	1.07968e-17
Atp5j	-0.550648	3.89389e-18	1.15547e-17
Myl6	0.494191	4.19102e-18	1.24139e-17
Tmem14c	-0.610534	4.89688e-18	1.44785e-17
Lrba	-0.256019	4.94101e-18	1.45827e-17
Hnrnpa3	-0.560168	5.55759e-18	1.63729e-17
Bckdk	-0.355124	5.75466e-18	1.6923e-17
Cdc123	-0.367868	6.04136e-18	1.77343e-17
Ppp1r7	-0.301186	6.10927e-18	1.79016e-17
Fzr1	-0.291445	6.17558e-18	1.80636e-17
Dnajc15	-0.541099	7.16592e-18	2.09229e-17
Nqo2	-0.255284	7.98661e-18	2.32777e-17
Cenpb	-0.27894	8.22676e-18	2.39351e-17
Rfwd3	-0.269974	1.00285e-17	2.91253e-17
Fkbp11	-0.683045	1.02131e-17	2.96088e-17
Manf	-0.61147	1.18684e-17	3.43469e-17
Mfge8	0.760139	1.1959e-17	3.45481e-17
Rps4x	0.35162	1.25468e-17	3.61825e-17
Ifitm3	0.467556	1.26896e-17	3.653e-17
Pck2	-0.301145	1.30461e-17	3.74903e-17
Sdhd	-0.50913	1.41545e-17	4.06042e-17
Rnaseh2b	-0.400055	1.48721e-17	4.25883e-17
Ipo5	-0.331802	1.60418e-17	4.58576e-17
Xrcc6	-0.355335	1.66741e-17	4.75823e-17
Cryl1	-0.452393	1.75151e-17	4.98952e-17
Psmd13	-0.495663	1.77122e-17	5.03691e-17
Rpn1	-0.38775	1.84895e-17	5.24883e-17
Snrpa	-0.392125	1.90687e-17	5.40389e-17
Suz12	-0.266242	2.22868e-17	6.30498e-17
Serpinh1	0.861665	2.27169e-17	6.41556e-17
Sephs1	-0.316921	2.30793e-17	6.50671e-17
Csrnp1	0.776219	2.52482e-17	7.10593e-17
Hmbs	-0.339541	2.57672e-17	7.23957e-17
Exosc7	-0.307111	2.6904e-17	7.54603e-17
Erp29	-0.588665	2.74957e-17	7.6988e-17
Casp8	-0.368697	2.87496e-17	8.03615e-17
Tecr	-0.671409	3.19629e-17	8.91913e-17
Kdm6b	0.843805	3.28348e-17	9.14683e-17
Vcpkmt	-0.312216	3.40413e-17	9.46683e-17
Fam25c	-0.556926	3.43138e-17	9.52644e-17
Lasp1	-0.424363	3.46e-17	9.58964e-17
Dnmt1	-0.301905	3.59797e-17	9.9552e-17
Cpox	-0.264304	3.75943e-17	1.03844e-16
Rps10	0.433455	3.80627e-17	1.04961e-16
Slc45a3	-0.428644	4.00116e-17	1.1015e-16
Psmc3	-0.593204	4.13041e-17	1.13517e-16
Rps24	0.269938	4.28916e-17	1.17683e-16
Hist3h2a	-0.50411	4.35608e-17	1.19319e-16
Fabp6	-0.269845	4.67567e-17	1.27859e-16
Acat1	-0.465834	4.84555e-17	1.32284e-16
Mpv17l2	-0.451656	5.08573e-17	1.38609e-16
Nsmce1	-0.332505	5.44414e-17	1.48131e-16
Slc40a1	-0.393544	5.56423e-17	1.51148e-16
Fads2	-0.314665	5.73807e-17	1.55612e-16
Tap1	-0.306847	6.12939e-17	1.65949e-16
Maz	-0.415379	6.47449e-17	1.75003e-16
Hcfc1	-0.253084	6.9201e-17	1.8674e-16
Rnaseh2a	-0.294403	7.06692e-17	1.90388e-16
Upf3b	-0.38741	7.34256e-17	1.9749e-16
Ubl4a	-0.558265	8.54511e-17	2.29457e-16
Smim26	-0.447647	8.57762e-17	2.29953e-16
Smarca4	-0.279914	9.23907e-17	2.47281e-16
Cd320	-0.314153	9.46731e-17	2.52976e-16
Mthfd2	-0.349511	9.68514e-17	2.58376e-16
Vdac1	-0.527187	9.78011e-17	2.60485e-16
Tm7sf2	-0.30748	9.86605e-17	2.61949e-16
Cnih1	-0.432142	9.86708e-17	2.61949e-16
Mrpl51	-0.553181	1.04628e-16	2.77315e-16
Abhd17c	-0.263568	1.14171e-16	3.02118e-16
Exosc2	-0.371333	1.15447e-16	3.05004e-16
Map1b	1.01636	1.16096e-16	3.06223e-16
Dram2	-0.404154	1.18713e-16	3.12624e-16
Sec13	-0.432219	1.202e-16	3.16032e-16
Lgals3bp	-0.540707	1.24315e-16	3.26328e-16
Mrps12	-0.484078	1.26314e-16	3.31044e-16
Oard1	-0.348273	1.54027e-16	4.03028e-16
Coq9	-0.323635	1.54716e-16	4.04186e-16
Fasn	-0.250599	1.62906e-16	4.24904e-16
Fopnl	-0.343288	1.78528e-16	4.6491e-16
Snrpa1	-0.448469	1.87935e-16	4.88631e-16
Gins4	-0.296519	1.91678e-16	4.97572e-16
Ndufaf2	-0.494533	2.21909e-16	5.75138e-16
Psmd2	-0.435084	2.45208e-16	6.34521e-16
Plk4	-0.341593	2.46555e-16	6.37e-16
Marcksl1	0.676566	2.5402e-16	6.55251e-16
Vma21	-0.335396	2.57804e-16	6.63966e-16
Rps16	0.430927	2.63065e-16	6.76454e-16
Jpt2	-0.286199	2.75234e-16	7.06634e-16
Eif3f	0.491041	2.96114e-16	7.59052e-16
Mrpl13	-0.319789	3.09766e-16	7.92807e-16
Kctd14	-0.254612	3.19022e-16	8.15224e-16
Ssr4	-0.616629	3.22311e-16	8.22345e-16
Derl2	-0.441281	3.36124e-16	8.56254e-16
Ndufa5	-0.529629	4.18759e-16	1.0651e-15
Timm13	-0.516531	4.27037e-16	1.08448e-15
Nxt1	-0.265395	4.63367e-16	1.17382e-15
Smdt1	-0.556431	4.63654e-16	1.17382e-15
Dnajc3	-0.463748	4.77741e-16	1.20762e-15
Rbbp4	-0.572767	5.26908e-16	1.32985e-15
Rps23	0.449026	5.36149e-16	1.3511e-15
Tpd52	-0.603724	5.37308e-16	1.35194e-15
Ndufs6	-0.547906	5.47166e-16	1.37316e-15
B2m	-0.779878	5.4742e-16	1.37316e-15
Hoxb13	-0.70031	5.75951e-16	1.44252e-15
Dusp6	0.882161	5.85982e-16	1.4654e-15
Srsf3	-0.596574	6.18532e-16	1.54444e-15
4930523C07Rik	0.870853	6.69009e-16	1.66794e-15
Ndufv3	-0.768465	6.96779e-16	1.73453e-15
Tpm2	0.766984	7.65986e-16	1.90392e-15
Sel1l3	-0.281673	7.97851e-16	1.98012e-15
Elovl5	-0.254991	8.80065e-16	2.18086e-15
Arpp19	-0.587575	8.81571e-16	2.18129e-15
2310061I04Rik	-0.256304	9.15739e-16	2.26146e-15
Rpl36	0.384483	9.16734e-16	2.26146e-15
Nudc	-0.590017	1.02858e-15	2.53355e-15
Cox5b	-0.539342	1.03094e-15	2.53556e-15
Ndufa9	-0.331259	1.08691e-15	2.6692e-15
Tmem173	-0.258674	1.10604e-15	2.71211e-15
Pola2	-0.940261	1.17982e-15	2.8887e-15
Rpl7	0.392498	1.19059e-15	2.91071e-15
Ehf	-0.501735	1.21207e-15	2.95883e-15
Rps21	0.311448	1.21774e-15	2.96824e-15
Gale	-0.327161	1.24022e-15	3.01854e-15
Cyb5r1	-0.309649	1.32833e-15	3.2282e-15
Rpp21	-0.386645	1.38036e-15	3.34967e-15
Cd63	0.628538	1.40545e-15	3.4055e-15
Psmc1	-0.458287	1.42452e-15	3.44662e-15
Psma5	-0.602081	1.54276e-15	3.7271e-15
Apoo	-0.373851	1.54499e-15	3.7271e-15
Eif1ad	-0.382404	1.56853e-15	3.7783e-15
Lyar	-0.451283	1.57583e-15	3.79033e-15
Fst	1.65123	1.59149e-15	3.82236e-15
Gmpr	-0.431903	1.72884e-15	4.14617e-15
Farsb	-0.324173	1.76403e-15	4.22439e-15
Cmss1	-0.287231	1.78127e-15	4.25846e-15
Tmsb10	0.604595	1.78408e-15	4.25846e-15
Fhl2	0.780456	1.78606e-15	4.25846e-15
Syngr2	-0.509455	1.85848e-15	4.42468e-15
Hnrnpul2	-0.326332	1.95887e-15	4.65695e-15
Sppl2a	-0.272547	2.04694e-15	4.85925e-15
Rpl23a	0.457694	2.07086e-15	4.90892e-15
Mrpl21	-0.446408	2.13233e-15	5.04734e-15
Coro1c	-0.349048	2.19851e-15	5.19647e-15
Ptrh2	-0.428051	2.23871e-15	5.28388e-15
Ndufc2	-0.593308	2.39118e-15	5.63562e-15
Smc6	-0.342983	2.40368e-15	5.65694e-15
Sdc1	0.645805	2.68629e-15	6.31297e-15
Trabd	-0.366148	2.87643e-15	6.75014e-15
Dst	0.850928	2.89021e-15	6.77277e-15
Dohh	-0.263044	2.94603e-15	6.89371e-15
Ctcf	-0.285912	3.22195e-15	7.52862e-15
Snrpg	-0.465048	3.26151e-15	7.61019e-15
Fuca2	-0.457293	3.45451e-15	8.04906e-15
Bcam	0.852589	3.52221e-15	8.19513e-15
Cdkn1a	0.734681	3.64773e-15	8.47516e-15
Mrpl58	-0.371496	3.74295e-15	8.68406e-15
Col17a1	0.768953	4.09561e-15	9.48885e-15
Slc31a1	-0.423304	4.59837e-15	1.06386e-14
Pcbd2	-0.358496	4.6935e-15	1.08434e-14
Kars	-0.260356	4.78142e-15	1.10309e-14
Mrps26	-0.557119	5.57664e-15	1.28474e-14
Ccl20	-1.41903	5.63771e-15	1.29699e-14
Mad2l2	-0.313892	6.0801e-15	1.3968e-14
Casp3	-0.304339	6.57682e-15	1.5088e-14
Bcl10	0.671881	6.60238e-15	1.51254e-14
Tmco1	-0.491412	6.62743e-15	1.51616e-14
Nelfe	-0.386718	6.75079e-15	1.54134e-14
Magt1	-0.251053	6.75631e-15	1.54134e-14
Cited4	-0.303729	7.15263e-15	1.62949e-14
Scgb2b27	-1.54252	7.69902e-15	1.75153e-14
Blnk	-0.376015	7.8351e-15	1.78001e-14
Cyc1	-0.546998	8.06072e-15	1.82873e-14
Cbx3	-0.603029	8.13e-15	1.8419e-14
Gps1	-0.359665	8.25988e-15	1.86874e-14
Trmt6	-0.281933	8.38644e-15	1.89476e-14
Lmo1	0.772648	9.14814e-15	2.064e-14
Pon3	-0.282239	9.16824e-15	2.06569e-14
Nop10	-0.580936	9.21756e-15	2.07395e-14
Ndufa2	-0.497523	9.6122e-15	2.15978e-14
Mydgf	-0.405605	1.01284e-14	2.27265e-14
Cd9	0.609173	1.02271e-14	2.29164e-14
Txn1	-0.407177	1.09837e-14	2.45784e-14
Krt19	-0.914883	1.12869e-14	2.52223e-14
Pebp1	-0.509169	1.28973e-14	2.87818e-14
Mvk	-0.400893	1.3054e-14	2.90918e-14
Nudt4	-0.31354	1.32013e-14	2.93801e-14
Sil1	-0.260631	1.33067e-14	2.95746e-14
Nudt1	-0.313406	1.35326e-14	3.00358e-14
Aaas	-0.279307	1.36541e-14	3.02644e-14
Slc25a1	-0.279116	1.41038e-14	3.12188e-14
Pnpla2	-0.293904	1.50904e-14	3.33576e-14
Srgn	-0.261542	1.60106e-14	3.53442e-14
Letm1	-0.292322	1.63632e-14	3.60739e-14
Bst2	-0.420228	1.64223e-14	3.61555e-14
Cox6a1	-0.548794	1.70838e-14	3.75613e-14
Slbp	-0.568251	1.72242e-14	3.78194e-14
Guk1	-0.416948	1.89383e-14	4.15274e-14
Casz1	-0.338742	1.96951e-14	4.31292e-14
Samm50	-0.346382	2.08621e-14	4.5572e-14
Slc5a3	0.967319	2.08663e-14	4.5572e-14
Mrps18c	-0.370347	2.28908e-14	4.9927e-14
Spink1	-3.65979	2.36361e-14	5.14839e-14
Rps3	0.282115	2.4657e-14	5.36364e-14
Impa2	-0.359928	2.60884e-14	5.66748e-14
Eif1	0.351332	2.74193e-14	5.94871e-14
Psmd3	-0.409065	2.78892e-14	6.04266e-14
Ddx39b	-0.462033	2.86583e-14	6.2011e-14
Cnot6	-0.275385	3.4051e-14	7.35824e-14
Rps25	0.336255	3.73215e-14	8.05437e-14
Asna1	-0.361385	3.78594e-14	8.15969e-14
Lage3	-0.379558	4.06168e-14	8.74248e-14
Ddx1	-0.263144	4.28937e-14	9.22046e-14
Kcnk1	-0.507499	4.31661e-14	9.26686e-14
Mycbp	-0.429766	4.49883e-14	9.64539e-14
Ewsr1	-0.492831	4.53252e-14	9.70493e-14
Mapk13	-0.44428	4.92403e-14	1.05295e-13
Sod1	-0.476972	5.08316e-14	1.08556e-13
Calm1	-0.590193	5.4324e-14	1.15863e-13
Rps18	0.273434	5.74144e-14	1.22295e-13
Msn	0.787197	5.83494e-14	1.24125e-13
Hexa	-0.461899	5.91812e-14	1.25731e-13
Spint2	-0.535111	5.94805e-14	1.26203e-13
Ddost	-0.479584	6.15165e-14	1.30355e-13
Cs	-0.374753	6.18394e-14	1.30869e-13
Rer1	-0.522035	6.47779e-14	1.36911e-13
Psmc4	-0.521064	6.57609e-14	1.3881e-13
Exoc4	-0.325475	7.55694e-14	1.59308e-13
Rpl24	0.423295	7.5946e-14	1.59897e-13
Krt4	-0.686234	7.73727e-14	1.62691e-13
Dazap1	-0.389311	7.9164e-14	1.66244e-13
Prdx1	-0.618673	7.98154e-14	1.67398e-13
Mrpl15	-0.295827	8.55785e-14	1.79255e-13
Cldn4	0.58092	8.78349e-14	1.83747e-13
Aldh3a2	-0.268405	9.56425e-14	1.9957e-13
Bicdl2	-0.296268	9.56425e-14	1.9957e-13
Nde1	-0.401369	1.06731e-13	2.22425e-13
Exosc8	-0.357849	1.0878e-13	2.26407e-13
Sf3a3	-0.310369	1.15051e-13	2.39154e-13
Ssbp4	-0.274551	1.17498e-13	2.4393e-13
Eif4a3	-0.372654	1.23322e-13	2.55699e-13
Rell1	-0.279213	1.29942e-13	2.69084e-13
Gjb4	1.00131	1.365e-13	2.82307e-13
Uqcrfs1	-0.571961	1.36883e-13	2.82742e-13
Plet1	0.948522	1.37245e-13	2.83132e-13
Lap3	-0.601444	1.37556e-13	2.83417e-13
Rnf114	-0.313709	1.41929e-13	2.9206e-13
Pcbp1	-0.441469	1.61627e-13	3.31811e-13
Pygb	-0.39467	1.61652e-13	3.31811e-13
Klf4	0.927899	1.63708e-13	3.35611e-13
Tcim	0.820079	1.70276e-13	3.48639e-13
Reg3g	-2.78381	1.81247e-13	3.7022e-13
Ccdc25	-0.25655	1.81268e-13	3.7022e-13
Gm15920	-0.494427	1.82501e-13	3.72276e-13
Cbx1	-0.437572	1.84353e-13	3.75586e-13
Hdgf	-0.476951	1.84985e-13	3.76376e-13
Rnf5	-0.316609	1.85201e-13	3.76376e-13
Phf5a	-0.481034	2.05009e-13	4.16114e-13
Smarcb1	-0.279569	2.13748e-13	4.33315e-13
Idh1	-0.444211	2.22e-13	4.49488e-13
Tram1	-0.487565	2.3386e-13	4.72917e-13
Tmcc3	-0.472272	2.44042e-13	4.92899e-13
Rpl8	0.294554	2.50876e-13	5.06078e-13
Spink5	-1.81833	2.53954e-13	5.11657e-13
Asl	-0.277136	2.57073e-13	5.17304e-13
Dnajb11	-0.388424	2.61147e-13	5.24858e-13
Ctss	-0.338805	2.61476e-13	5.24875e-13
Tma7	-0.506274	2.63686e-13	5.28663e-13
Nup43	-0.280704	2.76605e-13	5.53887e-13
Zcchc17	-0.385595	2.85684e-13	5.71368e-13
Rab25	-0.405756	3.06168e-13	6.11589e-13
Mrpl55	-0.297713	3.1075e-13	6.19987e-13
Get4	-0.312505	3.14769e-13	6.27241e-13
Ier5	0.709115	3.26981e-13	6.50784e-13
1810037I17Rik	-0.511699	3.28435e-13	6.52884e-13
Sparc	0.953066	3.4197e-13	6.78967e-13
Ifrd1	0.759044	3.51313e-13	6.96671e-13
Ndufb8	-0.524376	3.70151e-13	7.3314e-13
Pdia6	-0.49764	3.80119e-13	7.51711e-13
Hars	-0.369479	3.80445e-13	7.51711e-13
Adk	-0.362182	3.81514e-13	7.52915e-13
Zfand5	0.651502	3.83806e-13	7.55876e-13
Tmem64	-0.267305	3.83937e-13	7.55876e-13
Pdzd11	-0.389697	3.96614e-13	7.79897e-13
Alad	-0.324573	4.56136e-13	8.95863e-13
Hspa4	-0.367749	4.77674e-13	9.37041e-13
Srp9	-0.570276	5.46928e-13	1.07161e-12
Gipc1	-0.352404	5.57164e-13	1.09036e-12
Vasp	0.804848	6.12408e-13	1.19705e-12
Tysnd1	-0.252969	6.27341e-13	1.22477e-12
Med19	-0.322311	6.6079e-13	1.28854e-12
Paics	-0.351992	6.80768e-13	1.32592e-12
Atp5f1	-0.561021	6.8866e-13	1.3397e-12
Chchd3	-0.321528	7.25633e-13	1.40995e-12
Ptpa	-0.33769	7.51681e-13	1.45883e-12
Rtn4	0.586548	7.97147e-13	1.54524e-12
Hnrnpa0	-0.357283	8.57146e-13	1.65958e-12
Smim20	-0.388584	8.89747e-13	1.72067e-12
Rpl30	0.403831	8.96691e-13	1.73205e-12
Mmp15	-0.418781	9.02601e-13	1.74141e-12
Cnih4	-0.399241	9.39971e-13	1.81138e-12
Pin1	-0.46468	9.49427e-13	1.82745e-12
Sqle	-0.295174	9.73326e-13	1.87125e-12
Rps5	0.272746	9.92641e-13	1.90615e-12
Nipsnap2	-0.324657	1.09663e-12	2.10338e-12
Abcf1	-0.398387	1.17295e-12	2.24713e-12
Trim28	-0.36981	1.22534e-12	2.34475e-12
Cisd1	-0.401118	1.23009e-12	2.35109e-12
Agpat5	-0.258504	1.26049e-12	2.4064e-12
Snrpf	-0.442334	1.31139e-12	2.50065e-12
Miip	-0.369006	1.34379e-12	2.55945e-12
Tmx1	-0.25606	1.40857e-12	2.67972e-12
Gadd45gip1	-0.319713	1.42231e-12	2.70272e-12
Smagp	-0.362655	1.42549e-12	2.70562e-12
Brcc3	-0.329955	1.46414e-12	2.77576e-12
Plxnb2	-0.336806	1.50661e-12	2.85298e-12
Gsto1	0.650666	1.53004e-12	2.89401e-12
Cops5	-0.312026	1.58732e-12	2.99889e-12
Ndufv2	-0.545707	1.67838e-12	3.16727e-12
Mlec	-0.25326	1.69547e-12	3.19584e-12
Steap1	-0.295461	1.7168e-12	3.23231e-12
Gtf3c6	-0.331147	1.752e-12	3.2948e-12
Polr2f	-0.47747	1.93254e-12	3.63017e-12
Ifi202b	1.17461	1.93576e-12	3.63204e-12
Atp5j2	-0.512729	2.05984e-12	3.86043e-12
Mrps10	-0.286636	2.10582e-12	3.9421e-12
Cox17	-0.43148	2.12677e-12	3.97677e-12
Pigt	-0.259756	2.18734e-12	4.08537e-12
Sbp	-5.29182	2.20559e-12	4.11475e-12
Lamc2	0.783201	2.22138e-12	4.1395e-12
Psmd6	-0.444407	2.24334e-12	4.17566e-12
Got2	-0.409033	2.29008e-12	4.25784e-12
Cr1l	-0.258456	2.39136e-12	4.4411e-12
Carhsp1	-0.528022	2.43697e-12	4.52068e-12
Hsd17b12	-0.262166	2.47178e-12	4.58007e-12
Acp5	-0.385972	2.61958e-12	4.84844e-12
Psmb6	-0.569585	2.63583e-12	4.87301e-12
Pmepa1	0.717237	2.77038e-12	5.116e-12
Med28	-0.503089	3.01194e-12	5.55581e-12
Ss18l2	-0.396848	3.05243e-12	5.62416e-12
Mrpl2	-0.270392	3.07082e-12	5.65169e-12
Ube2l3	-0.519076	3.12296e-12	5.74119e-12
Rps8	0.306789	3.40414e-12	6.2511e-12
Idh2	-0.396275	3.53848e-12	6.49052e-12
Barx2	-0.343196	3.58917e-12	6.57612e-12
Fmc1	-0.336075	3.62761e-12	6.63913e-12
Pfdn6	-0.372547	3.79901e-12	6.94507e-12
Fam107b	1.08147	3.87288e-12	7.07222e-12
Timm8b	-0.562684	3.89884e-12	7.1117e-12
Zfp91	-0.310268	3.98722e-12	7.26482e-12
Qdpr	-0.265514	4.011e-12	7.30002e-12
Anapc5	-0.372758	4.04709e-12	7.35752e-12
Pomp	-0.506242	4.57705e-12	8.31176e-12
Med8	-0.48704	4.63734e-12	8.41192e-12
Pih1d1	-0.251066	4.7081e-12	8.53083e-12
Pgd	-0.457718	5.18814e-12	9.39025e-12
Impa1	-0.356489	5.34706e-12	9.66721e-12
Hnrnpab	-0.417448	5.85781e-12	1.05789e-11
Slc38a2	0.597608	5.98996e-12	1.08057e-11
Slc35b1	-0.350457	6.12668e-12	1.10402e-11
Mrpl54	-0.369089	6.33285e-12	1.13991e-11
Stip1	-0.316437	6.36415e-12	1.14429e-11
Nono	-0.431933	6.54872e-12	1.17618e-11
Bub3	-0.38007	6.63902e-12	1.1911e-11
Cyp2f2	0.983288	6.74234e-12	1.20831e-11
Cib1	-0.564801	6.94082e-12	1.24252e-11
Ostc	-0.437696	6.9607e-12	1.24472e-11
Mrpl40	-0.368105	7.0775e-12	1.26422e-11
Suclg1	-0.437792	7.29064e-12	1.30088e-11
Mrpl43	-0.346137	7.427e-12	1.32377e-11
Serbp1	-0.37465	7.44949e-12	1.32633e-11
Nop53	0.534473	7.56987e-12	1.3463e-11
Atp5a1	-0.500635	7.72191e-12	1.37185e-11
Atp6ap2	-0.269901	7.76632e-12	1.37825e-11
Krt8	-0.57846	7.80654e-12	1.38389e-11
Ap2s1	-0.482555	8.87963e-12	1.57242e-11
mt-Nd1	-0.328319	9.04775e-12	1.60045e-11
Dstn	0.451047	9.13737e-12	1.61456e-11
Nmi	-0.385659	9.79566e-12	1.72902e-11
Cnot11	-0.275661	1.07611e-11	1.89739e-11
Mapk1	-0.300197	1.08956e-11	1.91903e-11
Hmgcs1	-0.308072	1.12167e-11	1.97347e-11
Rps6	0.42341	1.13679e-11	1.99792e-11
Parl	-0.312776	1.16296e-11	2.0407e-11
Cnn2	0.754228	1.16362e-11	2.0407e-11
Grn	-0.531651	1.19603e-11	2.09529e-11
Rex1bd	-0.394691	1.23365e-11	2.15889e-11
Mboat1	-0.300654	1.25242e-11	2.1894e-11
Adh5	-0.410764	1.25739e-11	2.19574e-11
Phgdh	-0.469486	1.31706e-11	2.29748e-11
Mid1ip1	-0.271605	1.37006e-11	2.3874e-11
Aktip	-0.279323	1.38732e-11	2.41491e-11
Idh3g	-0.480937	1.53814e-11	2.67461e-11
Sdf4	-0.449007	1.56613e-11	2.72039e-11
Sumo3	-0.368437	1.60101e-11	2.77802e-11
Emc8	-0.422594	1.67319e-11	2.90019e-11
Cox7c	-0.550639	1.69228e-11	2.93018e-11
Mrpl14	-0.395824	1.72024e-11	2.97546e-11
Rpp25l	-0.288976	1.75573e-11	3.03363e-11
Abcd3	-0.363085	1.83244e-11	3.16285e-11
Cp	0.665191	2.03862e-11	3.51501e-11
Gusb	-0.323088	2.08466e-11	3.59061e-11
Ldha	-0.532258	2.09787e-11	3.60957e-11
Mrpl36	-0.519246	2.10646e-11	3.62055e-11
Pdlim4	0.741053	2.13395e-11	3.66395e-11
Mfsd4a	-0.263181	2.16964e-11	3.72133e-11
Map2k3	0.579313	2.17988e-11	3.73498e-11
Btg1	0.52146	2.25253e-11	3.85542e-11
Erh	-0.308603	2.26026e-11	3.86461e-11
Pnrc2	-0.286278	2.34011e-11	3.99698e-11
Itm2c	0.696319	2.44411e-11	4.17026e-11
Cxcl16	0.721997	2.50852e-11	4.27571e-11
Rogdi	-0.347466	2.69573e-11	4.59002e-11
Psmc5	-0.443353	2.7096e-11	4.60885e-11
Pxdc1	0.89287	2.79087e-11	4.73851e-11
Asnsd1	-0.26166	2.79322e-11	4.73851e-11
Rtn3	-0.350035	2.79451e-11	4.73851e-11
Hk2	0.763507	2.87844e-11	4.87579e-11
Cdc42ep3	0.815944	2.92545e-11	4.95029e-11
Clpp	-0.29059	3.07713e-11	5.2016e-11
Timm22	-0.276122	3.09922e-11	5.23352e-11
Cald1	0.921111	3.26326e-11	5.50487e-11
Ctsh	-0.447747	3.40927e-11	5.74525e-11
Rhou	-0.257728	3.79e-11	6.38029e-11
Klf13	0.714983	3.97016e-11	6.67671e-11
Atp5b	-0.501939	4.00043e-11	6.72072e-11
Polr2k	-0.409687	4.07396e-11	6.83724e-11
Rnpep	-0.374266	4.15693e-11	6.96935e-11
Clic4	0.72588	4.23329e-11	7.09011e-11
Ergic1	-0.325475	4.30179e-11	7.19748e-11
Sqstm1	0.753914	4.30909e-11	7.20233e-11
Gna11	-0.250265	4.67577e-11	7.80725e-11
Tgif1	0.604524	4.86797e-11	8.11989e-11
Ckmt1	-0.317036	5.40494e-11	9.00639e-11
Dusp7	0.734906	5.41956e-11	9.02159e-11
Selenok	0.401758	5.82734e-11	9.69054e-11
Rnf187	-0.369632	6.29964e-11	1.04653e-10
Ppp1ca	-0.433986	6.35039e-11	1.0539e-10
Defb1	0.642418	6.38455e-11	1.05849e-10
Tmem167	-0.290742	6.42319e-11	1.06382e-10
Arpc2	0.406251	6.52349e-11	1.07934e-10
Ilf2	-0.251278	6.62731e-11	1.09541e-10
Anxa5	0.649937	6.75561e-11	1.11549e-10
Ndufs3	-0.435347	7.18241e-11	1.18477e-10
Hibadh	-0.458592	7.73193e-11	1.27413e-10
Aes	-0.399733	8.00087e-11	1.31713e-10
Commd3	-0.413883	8.19763e-11	1.34816e-10
Ccdc3	0.675431	8.7636e-11	1.4398e-10
Bscl2	-0.255733	9.19093e-11	1.50849e-10
Dusp1	0.706033	9.98054e-11	1.63645e-10
Snai2	0.771554	1.00549e-10	1.64699e-10
Snx5	-0.310701	1.01302e-10	1.65768e-10
Med30	-0.459844	1.04053e-10	1.70099e-10
Lpcat4	-0.282573	1.06874e-10	1.74536e-10
Sin3b	-0.559228	1.0813e-10	1.76411e-10
Tmprss2	-0.33341	1.15277e-10	1.87884e-10
Cracr2b	-0.305123	1.23152e-10	2.00521e-10
Slc39a7	-0.310292	1.3778e-10	2.24115e-10
Nasp	-0.385342	1.3832e-10	2.2477e-10
Mrpl11	-0.329572	1.53363e-10	2.48968e-10
Ppa1	-0.488413	1.54736e-10	2.50947e-10
Mtch1	-0.323602	1.55692e-10	2.52248e-10
Anpep	-0.2844	1.56359e-10	2.5308e-10
Uchl3	-0.433537	1.60482e-10	2.59496e-10
Mrpl44	-0.256762	1.63109e-10	2.63485e-10
Mzt1	-0.330624	1.69748e-10	2.73938e-10
Mrps36	-0.346983	1.7043e-10	2.74767e-10
Eif3c	-0.434003	1.76783e-10	2.8473e-10
Sult5a1	0.886991	1.85109e-10	2.97646e-10
Mitd1	-0.287285	1.85166e-10	2.97646e-10
Ndufv1	-0.342969	2.09299e-10	3.36109e-10
Stap2	-0.28639	2.20216e-10	3.53294e-10
Tmem248	-0.301871	2.20655e-10	3.53652e-10
Etfb	-0.435691	2.2475e-10	3.59864e-10
Ahnak	0.628116	2.34126e-10	3.7451e-10
Ppp1r35	-0.306087	2.43587e-10	3.89265e-10
Sh3bgrl3	0.478681	2.44716e-10	3.90686e-10
Uqcrb	-0.491433	2.45642e-10	3.91784e-10
Arid5b	0.774846	2.55086e-10	4.0645e-10
Psmb5	-0.434842	2.63267e-10	4.19078e-10
Cfap20	-0.252228	2.63643e-10	4.19269e-10
Snrpd3	-0.295317	2.75551e-10	4.37781e-10
Mrpl30	-0.46383	3.0235e-10	4.79893e-10
Dcps	-0.250408	3.11236e-10	4.93519e-10
Mxd4	0.689023	3.22688e-10	5.11183e-10
Krtcap2	-0.415712	3.24356e-10	5.13328e-10
Mmp7	-1.30904	3.31584e-10	5.24261e-10
Csnk2b	-0.347719	3.35515e-10	5.29965e-10
Tmed10	-0.396183	3.47472e-10	5.48323e-10
Cnn3	0.60026	3.52185e-10	5.55225e-10
Rap1b	0.560565	3.63604e-10	5.72676e-10
Itgb1	0.615942	3.81015e-10	5.99522e-10
Tmem242	-0.32988	4.11669e-10	6.47135e-10
Fkbp3	-0.328532	4.18329e-10	6.56972e-10
Lamb3	0.704978	4.23978e-10	6.65207e-10
Rpl28	0.344785	4.36727e-10	6.84554e-10
Pgam1	-0.380158	4.80913e-10	7.53093e-10
Eif3b	-0.283681	5.00198e-10	7.82545e-10
Zfp131	-0.723814	5.42614e-10	8.48093e-10
Rpl31	0.345034	5.63267e-10	8.79535e-10
Dera	-0.289402	6.00395e-10	9.35916e-10
Nmt1	-0.267088	6.00518e-10	9.35916e-10
Tomm40	-0.263383	6.03246e-10	9.39274e-10
Pdpn	0.803397	6.98964e-10	1.08728e-09
Igsf3	0.743306	7.03513e-10	1.09332e-09
Sod2	-0.490645	7.1185e-10	1.10424e-09
Ets1	0.70849	7.11888e-10	1.10424e-09
Ptrhd1	-0.251158	7.13821e-10	1.10619e-09
Ptn	-0.446156	7.53443e-10	1.16648e-09
Rpl3	0.373575	7.58242e-10	1.17281e-09
Prkaca	-0.319839	7.89543e-10	1.22007e-09
Ivns1abp	-0.400503	7.9389e-10	1.22563e-09
Hnrnpm	-0.282243	8.05266e-10	1.24202e-09
Herpud1	-0.306469	8.09011e-10	1.24662e-09
Spry2	0.835776	8.2509e-10	1.2702e-09
H2afy	-0.433529	8.28302e-10	1.27395e-09
Npc2	-0.613517	8.35619e-10	1.284e-09
Uba1	-0.267776	9.0281e-10	1.38594e-09
Ndrg1	0.698638	9.16072e-10	1.40499e-09
Cct7	-0.451938	9.31668e-10	1.42757e-09
Tmem147	-0.413241	9.64282e-10	1.47616e-09
Atp5e	-0.298903	1.00181e-09	1.53218e-09
Use1	0.560853	1.01072e-09	1.54437e-09
Xpnpep1	-0.333578	1.0333e-09	1.5774e-09
Ddx5	0.40931	1.05705e-09	1.61215e-09
Npdc1	-0.311268	1.06285e-09	1.61948e-09
Ssb	-0.321774	1.07361e-09	1.63436e-09
Bsg	0.391768	1.12897e-09	1.71705e-09
Aldh7a1	-0.320548	1.14718e-09	1.74312e-09
Cebpzos	-0.299458	1.19217e-09	1.8098e-09
Dhrs7	-0.326832	1.19415e-09	1.81112e-09
Psmb8	-0.47943	1.19616e-09	1.8125e-09
Ssr3	-0.366597	1.19863e-09	1.81457e-09
D8Ertd738e	-0.369666	1.22176e-09	1.84787e-09
Trap1	-0.285153	1.23891e-09	1.87209e-09
Ndufa13	-0.541087	1.2482e-09	1.88438e-09
Pgk1	-0.486079	1.34105e-09	2.02268e-09
Rnf7	-0.368648	1.38805e-09	2.09166e-09
Ywhah	-0.411649	1.40453e-09	2.11454e-09
Tax1bp1	-0.612989	1.42509e-09	2.14352e-09
Stt3b	-0.253516	1.44236e-09	2.16752e-09
Ndufb5	-0.41399	1.47568e-09	2.21555e-09
Hsp90b1	-0.454981	1.47944e-09	2.21808e-09
Tsta3	-0.353876	1.48007e-09	2.21808e-09
Slirp	-0.445979	1.57106e-09	2.35228e-09
Ddx23	-0.786735	1.58076e-09	2.36464e-09
Nfyc	-0.32889	1.6351e-09	2.44178e-09
Rexo2	-0.372894	1.63531e-09	2.44178e-09
Eif4g1	-0.332157	1.71803e-09	2.56296e-09
Uqcrc2	-0.28888	1.7383e-09	2.59084e-09
Ndufs7	-0.362011	1.76578e-09	2.62941e-09
Rps17	0.348778	1.76785e-09	2.6301e-09
Atp5mpl	-0.391425	1.80444e-09	2.6821e-09
Hdac3	-0.289836	1.83273e-09	2.72168e-09
Mia	0.814634	1.88497e-09	2.79672e-09
Eny2	-0.394036	1.98408e-09	2.94111e-09
Osgep	-0.292804	1.99554e-09	2.95542e-09
Copz1	-0.281898	2.01486e-09	2.98134e-09
Rpl15	0.346079	2.11966e-09	3.13358e-09
Ddit4	-0.284778	2.14649e-09	3.17039e-09
Ubald2	-0.304281	2.16806e-09	3.19936e-09
Pdlim7	0.746024	2.20402e-09	3.2495e-09
Tsnax	-0.289263	2.26256e-09	3.3328e-09
Eva1a	0.602627	2.37631e-09	3.49722e-09
Vdac3	-0.464859	2.63424e-09	3.87333e-09
Isca2	-0.316645	2.69498e-09	3.95909e-09
Gdi2	-0.387791	2.70897e-09	3.97607e-09
Rbms3	0.647193	2.73365e-09	4.0087e-09
Akap10	-0.299607	2.75395e-09	4.03485e-09
Cd164	-0.362394	2.77056e-09	4.05557e-09
App	0.622135	3.15463e-09	4.61364e-09
Prdx6	-0.775865	3.30838e-09	4.83419e-09
Mrps35	-0.251705	3.51545e-09	5.13217e-09
0610040J01Rik	-0.267615	3.59957e-09	5.2503e-09
Sdhc	-0.346447	3.82184e-09	5.56955e-09
Ccdc124	-0.329564	3.83854e-09	5.58891e-09
Acaa2	-0.297238	3.95073e-09	5.74715e-09
Fuca1	-0.523958	4.0824e-09	5.93343e-09
Inhba	1.11315	4.48776e-09	6.5168e-09
Anapc13	-0.475941	4.83698e-09	7.01769e-09
Ccnd2	0.615276	5.5763e-09	8.08317e-09
Polr2e	-0.372233	5.61811e-09	8.13657e-09
Fam50a	-0.261438	5.87479e-09	8.5008e-09
Cetn2	-0.397243	6.02532e-09	8.71093e-09
Cxcl14	0.894402	6.06124e-09	8.75513e-09
Hnrnpl	-0.360018	6.1934e-09	8.93814e-09
Sub1	0.303297	6.34387e-09	9.14724e-09
Psma7	-0.421205	6.7163e-09	9.67572e-09
Cox6c	-0.298158	7.48555e-09	1.07744e-08
Ndufb6	-0.34501	7.51995e-09	1.08145e-08
Psmd14	-0.302814	7.7727e-09	1.11681e-08
Mrpl27	-0.326279	7.8329e-09	1.12448e-08
Saa3	0.615634	7.93111e-09	1.13758e-08
Ndufb10	-0.446553	7.94965e-09	1.13924e-08
Sgk1	0.643123	8.18873e-09	1.17248e-08
Ptges3	-0.350402	8.2242e-09	1.17653e-08
Sertad2	0.701049	8.35759e-09	1.19457e-08
Pdap1	-0.425758	8.47076e-09	1.20969e-08
Tgm2	0.70425	8.51009e-09	1.21424e-08
Ccnl1	0.520673	9.13322e-09	1.30202e-08
Smim22	-0.364511	9.22727e-09	1.31428e-08
Smtn	0.616853	9.48077e-09	1.34922e-08
Tfap2a	0.692382	9.5384e-09	1.35624e-08
Tmed3	-0.59034	9.5764e-09	1.36046e-08
Vdac2	-0.373162	9.74975e-09	1.38389e-08
Cox7b	-0.469581	1.02813e-08	1.45808e-08
Ppa2	-0.310237	1.04534e-08	1.4812e-08
Hspa9	-0.301896	1.05126e-08	1.4883e-08
Commd1	-0.253464	1.05882e-08	1.49771e-08
Psma6	-0.291966	1.12549e-08	1.59065e-08
Gtf2h5	-0.431836	1.13969e-08	1.60933e-08
Atp5h	-0.439826	1.21042e-08	1.70683e-08
Gsr	-0.384762	1.21083e-08	1.70683e-08
Serpinb5	0.620018	1.23447e-08	1.73866e-08
Vps35l	-0.305217	1.23672e-08	1.74033e-08
Pdgfa	0.65637	1.26436e-08	1.7777e-08
Tcp1	-0.260717	1.33102e-08	1.86982e-08
Nudt21	-0.290586	1.42964e-08	2.00664e-08
Zmat2	-0.269235	1.45727e-08	2.04367e-08
Gsn	0.814213	1.54729e-08	2.16806e-08
Rhoc	0.63256	1.63493e-08	2.28891e-08
1500011B03Rik	-0.280251	1.65333e-08	2.31269e-08
Pard6g	0.588636	1.69309e-08	2.36628e-08
Caprin1	-0.282581	1.75125e-08	2.44549e-08
Fkbp4	-0.425861	1.75297e-08	2.44579e-08
Psma2	-0.445294	1.89229e-08	2.63668e-08
Gpx1	0.486466	1.893e-08	2.63668e-08
Rrp7a	-0.271958	1.92843e-08	2.68374e-08
Plscr1	-0.333102	1.94661e-08	2.70674e-08
Rbx1	-0.562023	1.95691e-08	2.71876e-08
Hnrnpa1	-0.384378	2.01773e-08	2.80089e-08
Psma1	-0.372852	2.06134e-08	2.859e-08
Cpne8	0.655473	2.29797e-08	3.18449e-08
Bola2	-0.430263	2.4346e-08	3.37098e-08
Atp1a1	0.496984	2.56633e-08	3.55038e-08
Cops3	-0.294239	2.60011e-08	3.59408e-08
Swi5	-0.423183	2.92998e-08	4.04663e-08
Sprr1a	1.06925	2.95018e-08	4.0711e-08
Ppp3ca	0.642431	3.03454e-08	4.18399e-08
mt-Cytb	-0.276656	3.10488e-08	4.27737e-08
Spcs2	-0.511925	3.11343e-08	4.28555e-08
Stat1	-0.301327	3.136e-08	4.31299e-08
Psma4	-0.423245	3.26475e-08	4.4863e-08
Snrpb2	-0.30746	3.27652e-08	4.49869e-08
Tpd52l1	-0.322972	3.36715e-08	4.61925e-08
Tcn2	-0.293641	3.38391e-08	4.63836e-08
Mrpl32	-0.281901	3.41296e-08	4.67427e-08
Nsfl1c	-0.264452	3.48335e-08	4.76669e-08
C1qbp	-0.314032	3.55976e-08	4.86719e-08
Prelid3b	-0.274914	3.68785e-08	5.03811e-08
Ndufa3	-0.398845	3.71632e-08	5.07278e-08
Lgals3	0.67429	3.72389e-08	5.07888e-08
Rpl18	0.322281	3.75307e-08	5.11442e-08
Il33	0.712142	3.84858e-08	5.24021e-08
Dnajc8	-0.344906	3.87951e-08	5.27794e-08
Mrps18a	-0.321989	3.92094e-08	5.32988e-08
Rrp1	-0.2587	4.18448e-08	5.6834e-08
Gtf2a2	-0.310838	4.20008e-08	5.69985e-08
Edn1	-0.384565	4.47822e-08	6.07229e-08
Psmb3	-0.395468	5.02796e-08	6.81207e-08
Ypel3	0.629592	5.27075e-08	7.13511e-08
Ap1s1	-0.314279	5.58172e-08	7.54984e-08
Cope	-0.388652	6.19046e-08	8.36631e-08
Zfp207	-0.273196	6.20444e-08	8.3783e-08
Col18a1	0.611963	6.21186e-08	8.3814e-08
Snrpc	-0.295763	6.3044e-08	8.49608e-08
Tmem176a	0.572381	6.30779e-08	8.49608e-08
Vps36	-0.272398	6.31241e-08	8.49608e-08
Wsb1	0.620773	6.69614e-08	9.00516e-08
Mmgt2	-0.259468	6.8328e-08	9.1814e-08
Psmd7	-0.407496	8.28079e-08	1.1118e-07
Anxa2	0.416575	8.30234e-08	1.11378e-07
Eef2	0.315556	9.70109e-08	1.30036e-07
Selenom	0.587595	1.03614e-07	1.38774e-07
Eapp	-0.290348	1.05107e-07	1.40659e-07
Mrpl17	-0.271875	1.09851e-07	1.46887e-07
Nudt22	-0.29455	1.15147e-07	1.53842e-07
Glod4	-0.370005	1.15788e-07	1.54573e-07
Srp19	-0.321795	1.24609e-07	1.66213e-07
H2-T22	-0.283981	1.26396e-07	1.68367e-07
Cbr1	-0.276296	1.2643e-07	1.68367e-07
Hdlbp	-0.251503	1.29311e-07	1.72064e-07
Polr2j	-0.319419	1.32029e-07	1.75539e-07
Fmo2	0.746463	1.32984e-07	1.76665e-07
Ywhaq	-0.382852	1.34364e-07	1.78354e-07
Aurkaip1	-0.301444	1.38756e-07	1.84034e-07
Plpp2	-0.262663	1.45353e-07	1.92629e-07
1110008P14Rik	-0.320623	1.48687e-07	1.96887e-07
Cct8	-0.305913	1.50916e-07	1.99678e-07
Polr2i	-0.27163	1.60329e-07	2.11961e-07
Thoc7	-0.382408	1.61795e-07	2.13726e-07
Fosb	0.569375	1.62253e-07	2.14158e-07
Emc6	-0.268644	1.67216e-07	2.20531e-07
Tmbim6	-0.392841	1.7183e-07	2.26434e-07
Eif3d	-0.29168	1.73476e-07	2.2842e-07
Dusp5	0.797042	1.79548e-07	2.36225e-07
Dmac1	-0.25934	1.81368e-07	2.38428e-07
Csta1	-0.43181	1.84429e-07	2.42257e-07
Krt16	0.899555	1.88883e-07	2.4791e-07
Ltbp4	0.627704	1.91983e-07	2.51776e-07
Hadh	-0.25725	2.06455e-07	2.70539e-07
Tmem208	-0.313933	2.06952e-07	2.70973e-07
Rpl10a	0.351931	2.14894e-07	2.81147e-07
Zyx	0.674447	2.16378e-07	2.82862e-07
Trnau1ap	-0.312748	2.41432e-07	3.15363e-07
Jun	0.410759	2.46766e-07	3.22074e-07
Hprt	-0.259945	2.49425e-07	3.25285e-07
Jund	0.344289	2.71102e-07	3.53274e-07
Mmachc	0.599974	2.90726e-07	3.78544e-07
Klf5	0.429823	2.91507e-07	3.79261e-07
Rpl17	0.397932	2.9771e-07	3.87023e-07
Uqcc2	-0.280673	2.98694e-07	3.87994e-07
Slc25a11	-0.341113	3.04176e-07	3.94802e-07
Rpl27a	0.29835	3.13345e-07	4.06382e-07
Mpc1	-0.317702	3.1806e-07	4.12169e-07
Tmem106c	-0.315303	3.43243e-07	4.44452e-07
Eif5a	-0.298142	3.53976e-07	4.57989e-07
Mrpl20	-0.263818	3.8913e-07	5.03074e-07
Snrpd2	-0.306383	3.98266e-07	5.1448e-07
Ndfip2	0.624967	4.01909e-07	5.18776e-07
Hspa8	-0.408678	4.17329e-07	5.38256e-07
Reep4	-0.293348	4.2351e-07	5.45798e-07
Tsen34	-0.312261	4.36027e-07	5.61487e-07
Tgfb1i1	0.388702	4.41179e-07	5.67676e-07
Nedd8	-0.388422	4.43112e-07	5.69715e-07
Pqlc1	0.671659	4.58307e-07	5.8879e-07
Cxcl12	0.409085	4.63539e-07	5.95045e-07
Tagln	0.725815	4.64292e-07	5.95545e-07
Arc	0.655321	5.08739e-07	6.52046e-07
Agrn	0.638967	5.32214e-07	6.816e-07
Hinfp	-0.259013	5.43038e-07	6.94919e-07
Cox14	-0.303818	5.52105e-07	7.05971e-07
Ptpn1	0.671463	5.75062e-07	7.34752e-07
Higd1a	-0.354444	5.77631e-07	7.37458e-07
Lmna	0.410734	5.88821e-07	7.5116e-07
Ctsl	0.709389	5.93033e-07	7.55944e-07
Eif4ebp1	-0.259167	6.33485e-07	8.06881e-07
Xbp1	-0.269589	6.37699e-07	8.11609e-07
Bet1	-0.258241	6.38188e-07	8.11609e-07
D030056L22Rik	-0.308846	6.41615e-07	8.15334e-07
Tshz2	0.684071	6.62507e-07	8.4123e-07
Bhlhe41	0.711922	7.0508e-07	8.94594e-07
Psmb2	-0.383769	7.10708e-07	9.01037e-07
Psmd1	-0.324965	7.17882e-07	9.09428e-07
Cldn1	0.599643	7.18551e-07	9.09572e-07
Tbpl1	-0.293204	7.20079e-07	9.10803e-07
Mrps16	-0.251278	7.67828e-07	9.70449e-07
Pcmt1	-0.307366	7.73952e-07	9.77435e-07
Dnajb9	0.65471	8.02313e-07	1.01247e-06
Srm	-0.280025	8.16347e-07	1.02939e-06
Cd81	-0.416684	8.39931e-07	1.05831e-06
Edf1	-0.348682	8.89687e-07	1.12014e-06
Mvb12a	-0.285347	9.05544e-07	1.13923e-06
Isyna1	-0.252102	9.18989e-07	1.15526e-06
Pttg1ip	0.650968	9.28866e-07	1.16678e-06
Cops6	-0.289597	9.62291e-07	1.20784e-06
Ncbp2	-0.27477	9.72561e-07	1.2198e-06
Fxyd3	0.260243	9.96364e-07	1.24869e-06
Commd6	-0.303172	1.02945e-06	1.28917e-06
Acadl	-0.278543	1.05827e-06	1.32425e-06
Ly6c1	-0.654857	1.06498e-06	1.33163e-06
Ddrgk1	-0.332219	1.13979e-06	1.42409e-06
Emg1	-0.287652	1.14819e-06	1.43349e-06
Trib1	0.543137	1.16645e-06	1.45517e-06
Rab15	-0.268838	1.18396e-06	1.4759e-06
Rab10	0.499053	1.22807e-06	1.52972e-06
Mettl9	-0.282522	1.25655e-06	1.56401e-06
Pabpc1	0.288728	1.3471e-06	1.67504e-06
Kmt2d	0.604012	1.3478e-06	1.67504e-06
Cfl1	0.280844	1.35096e-06	1.67769e-06
Ifitm2	0.266659	1.45536e-06	1.80597e-06
Hmg20b	-0.260752	1.4862e-06	1.84285e-06
Psmc2	-0.273635	1.58913e-06	1.96898e-06
Dctn6	-0.276801	1.63875e-06	2.02893e-06
Sptssa	-0.340756	1.68261e-06	2.08166e-06
Mdh2	-0.377026	1.72032e-06	2.1267e-06
Rbm8a	-0.257236	1.89403e-06	2.33969e-06
Bax	-0.295221	1.93008e-06	2.38242e-06
Med29	-0.272719	1.93507e-06	2.38679e-06
Cxcl2	-0.544476	2.02434e-06	2.49501e-06
Gpx3	-0.592333	2.13481e-06	2.62919e-06
Mdfi	0.594601	2.22366e-06	2.73655e-06
Wls	0.625909	2.29966e-06	2.82796e-06
Nbl1	0.608564	2.31002e-06	2.83857e-06
Trpc4ap	-0.289585	2.38948e-06	2.93401e-06
Eif5	0.348895	2.42374e-06	2.97385e-06
Jagn1	-0.260818	2.44838e-06	3.00184e-06
Ppp1cb	-0.304915	2.45139e-06	3.00327e-06
mt-Nd6	-0.301799	2.45507e-06	3.00553e-06
Hnrnpu	-0.301463	2.84315e-06	3.47803e-06
Apobec3	-0.434286	2.84757e-06	3.48084e-06
Rbms1	0.580223	2.97837e-06	3.63801e-06
Gabarapl2	0.490482	3.0535e-06	3.727e-06
Ndufb9	-0.316984	3.05763e-06	3.72926e-06
Idnk	-0.333614	3.2245e-06	3.92986e-06
Lyrm1	0.489224	3.26967e-06	3.98195e-06
H2-D1	-0.354517	3.28815e-06	4.00148e-06
Nfkb1	0.548299	3.87364e-06	4.71049e-06
Lrp1	0.490997	3.89084e-06	4.72789e-06
Ndufs8	-0.328965	4.32476e-06	5.25127e-06
Basp1	-0.357723	4.86937e-06	5.90817e-06
Dsp	0.519234	5.25379e-06	6.36988e-06
Ap1s3	0.40795	5.26557e-06	6.37944e-06
Eno1	-0.334319	5.27614e-06	6.38752e-06
Mrpl52	0.250973	5.4909e-06	6.64261e-06
Mrpl33	-0.328439	5.61232e-06	6.78449e-06
Pdcd4	0.478607	5.95665e-06	7.19542e-06
Rab3ip	-0.297242	6.14826e-06	7.42141e-06
Srsf5	0.375178	6.40825e-06	7.72954e-06
Mrps21	-0.36116	6.48743e-06	7.81929e-06
Sat1	0.364785	6.83146e-06	8.22789e-06
Rbm39	0.279012	7.22827e-06	8.69941e-06
Prdx2	-0.349879	7.30876e-06	8.78983e-06
Arl13b	0.547722	7.64382e-06	9.18604e-06
Ost4	-0.291541	7.69769e-06	9.23741e-06
Sdhb	-0.34267	7.69784e-06	9.23741e-06
Snf8	-0.254865	7.85943e-06	9.42441e-06
Urah	0.418387	7.91792e-06	9.4876e-06
Psap	0.3177	8.27978e-06	9.91395e-06
Tsc22d2	0.508372	8.32704e-06	9.96326e-06
Hcar2	0.561849	8.3359e-06	9.96657e-06
Nudt5	-0.321138	8.87973e-06	1.0609e-05
Nradd	0.507995	9.18207e-06	1.09623e-05
Vcp	-0.270735	9.3588e-06	1.11651e-05
Igfbp4	0.52894	1.01416e-05	1.20902e-05
Sox4	0.721619	1.04252e-05	1.24192e-05
Hs3st1	0.704956	1.04777e-05	1.24727e-05
Eif4a1	-0.333072	1.08969e-05	1.29623e-05
Ndufa7	-0.275832	1.13234e-05	1.34598e-05
Ube2b	0.398275	1.14127e-05	1.35562e-05
Gm49359	-0.320468	1.20249e-05	1.4273e-05
S100a1	-0.398525	1.2056e-05	1.42995e-05
Mrps17	-0.287064	1.20715e-05	1.43077e-05
Fgfr1	0.413843	1.25457e-05	1.48589e-05
Ssr2	-0.254012	1.29688e-05	1.5349e-05
Tbcb	-0.269473	1.30085e-05	1.53847e-05
Echdc2	-0.330085	1.30278e-05	1.53965e-05
Epha2	0.590471	1.47723e-05	1.74456e-05
Plekhj1	-0.298058	1.56433e-05	1.84608e-05
Icam1	0.535195	1.63118e-05	1.92359e-05
Rpl36a	0.36176	1.63422e-05	1.9258e-05
Gnb2	-0.274181	1.64285e-05	1.93457e-05
Ecm1	0.576676	1.66025e-05	1.95366e-05
Wfdc2	-0.970941	1.72672e-05	2.03042e-05
Cd151	0.49882	1.77695e-05	2.08799e-05
Anp32a	-0.263715	1.80618e-05	2.12081e-05
Mtch2	-0.281282	1.81336e-05	2.12771e-05
Lamtor1	-0.299651	1.87671e-05	2.20047e-05
Luzp1	0.493565	1.95899e-05	2.29529e-05
Set	-0.259439	1.98869e-05	2.32843e-05
Chmp2a	-0.297207	2.04931e-05	2.39769e-05
Atp1b1	0.499828	2.2283e-05	2.60525e-05
Cdcp1	0.553113	2.24307e-05	2.62064e-05
Scand1	-0.345696	2.25141e-05	2.62851e-05
Tacstd2	0.688071	2.37469e-05	2.77047e-05
U2af1	-0.298394	2.49133e-05	2.90448e-05
Cyb5r3	-0.314062	2.58343e-05	3.00971e-05
Hmgn1	-0.274201	2.63061e-05	3.0625e-05
Pgls	-0.306945	2.65015e-05	3.08306e-05
Rflnb	0.57165	2.71116e-05	3.1518e-05
Eef1akmt3	0.572212	2.72595e-05	3.16674e-05
Prss23	0.612412	2.73362e-05	3.1734e-05
Ndufa8	-0.274439	3.01948e-05	3.50277e-05
Psmb4	-0.292415	3.2803e-05	3.80264e-05
Tbc1d1	0.555989	3.29594e-05	3.81807e-05
Tpm4	0.333834	3.33741e-05	3.86337e-05
Mrps6	0.569203	3.41426e-05	3.94955e-05
Tubb6	0.508799	3.41856e-05	3.95173e-05
Laptm4a	0.270056	3.55628e-05	4.10803e-05
Ptprs	0.459247	3.67158e-05	4.23822e-05
Ubxn4	0.442079	3.70075e-05	4.2689e-05
Dennd2c	0.505264	3.93135e-05	4.5317e-05
Pbx1	0.551491	4.04595e-05	4.66053e-05
Rrad	0.439057	4.09498e-05	4.71368e-05
Emc7	-0.256977	4.40791e-05	5.07034e-05
Cdk4	-0.279157	4.60299e-05	5.29102e-05
4933434E20Rik	-0.252017	4.65411e-05	5.34602e-05
Pnrc1	0.344463	4.66114e-05	5.35034e-05
Adgrb1	0.455879	4.66634e-05	5.35257e-05
Cdv3	0.44365	4.72247e-05	5.41316e-05
Vmp1	0.464157	4.73441e-05	5.42306e-05
Rnase4	0.444408	4.90066e-05	5.60956e-05
Runx1	0.590415	4.92782e-05	5.63672e-05
Tmem256	-0.344375	5.41499e-05	6.18964e-05
Npm1	-0.306833	5.5184e-05	6.30345e-05
Smim14	-0.316046	5.55991e-05	6.34644e-05
Rnd3	0.545492	5.78351e-05	6.59706e-05
Chic2	0.400904	5.83985e-05	6.6567e-05
S100a16	0.284385	5.89349e-05	6.71317e-05
Acta2	0.492279	6.13989e-05	6.98898e-05
Mettl13	0.396818	6.21998e-05	7.07523e-05
Crip1	0.769097	6.23204e-05	7.08403e-05
Picalm	0.595218	6.70224e-05	7.61322e-05
Cwc15	-0.280577	6.7199e-05	7.628e-05
Zfp738	0.496161	6.90768e-05	7.83572e-05
Tax1bp3	0.408335	6.98923e-05	7.92274e-05
Cast	0.498961	7.28262e-05	8.24961e-05
Sema3c	0.564528	7.78927e-05	8.81743e-05
Prelp	0.511351	7.97492e-05	9.02135e-05
Ttc9	0.586411	8.46199e-05	9.56572e-05
Eef1d	-0.287966	8.71326e-05	9.84298e-05
Itga6	0.464035	8.98198e-05	0.000101395
Srrm2	0.34252	9.3151e-05	0.000105084
Tra2a	0.38709	9.6737e-05	0.000109054
Amotl1	0.526881	9.95244e-05	0.000112119
Slco2a1	0.499905	0.000105785	0.000119089
Auts2	0.567257	0.000107007	0.000120383
Sik1	0.562531	0.000112549	0.00012653
Dad1	-0.326972	0.000113837	0.000127891
Ktn1	0.533946	0.000116702	0.00013102
Usmg5	-0.260088	0.000117591	0.000131928
Serinc3	-0.361053	0.000119598	0.000134088
Cd24a	-0.32143	0.000121487	0.000136112
Ncs1	0.384968	0.000122132	0.000136742
Eif3e	0.263063	0.000123773	0.000138484
Nrip1	0.572425	0.000129471	0.00014476
Plec	0.455283	0.000131327	0.000146735
Fermt2	0.578673	0.000135812	0.000151643
Atxn1	0.560954	0.000136446	0.000152247
Hspe1	-0.251152	0.000137383	0.000153188
Cacna2d1	0.465656	0.000146391	0.000163121
Uqcrc1	-0.30859	0.000157927	0.000175856
Skil	0.536221	0.000164985	0.000183591
Camk2n1	0.401283	0.000165379	0.000183904
Lor	0.379177	0.000168176	0.000186888
AW822252	-0.514081	0.000169611	0.000188354
Il7	0.396345	0.000169844	0.000188485
Moxd1	0.423948	0.00017408	0.000193056
F11r	0.411982	0.000191373	0.00021209
Hspa5	-0.322238	0.000202267	0.000224011
Tomm22	-0.301999	0.000205223	0.000227132
Arf6	0.295764	0.00020674	0.000228657
Ly6d	0.941183	0.00020719	0.000229
Dlgap4	0.519693	0.000208729	0.000230545
Csf3	0.56755	0.000216995	0.000239513
Tns1	0.32249	0.000219093	0.000241666
Arl4c	0.507405	0.000230853	0.000254467
Bri3	0.353093	0.000234194	0.000257976
Mrfap1	-0.286894	0.000235557	0.000259303
Myc	0.614185	0.000239118	0.000263046
Ube2k	-0.269765	0.000239791	0.000263609
Trp63	0.432927	0.000269817	0.000296419
Eif2s2	0.258131	0.000284636	0.000312489
Nrg1	0.493632	0.000286572	0.000314404
Aldh2	0.399897	0.000301987	0.000331094
Fgfr2	0.475723	0.000325315	0.000356432
Padi1	0.346484	0.000358652	0.000392695
Elf1	0.451172	0.000365628	0.000400066
Atf4	0.270178	0.000379763	0.000415255
Piezo1	0.45466	0.000387244	0.000423152
Aebp1	0.553218	0.000396926	0.000433443
Coq10b	0.517824	0.000403021	0.000439806
Ddah2	0.50175	0.000410877	0.000448081
Lmo4	0.403153	0.000433325	0.000472247
Hif1a	0.423026	0.000441348	0.00048067
Fbxo30	0.468575	0.000449699	0.00048944
Antxr1	0.357808	0.000459029	0.000499262
Dtx3	0.340197	0.000461541	0.000501662
Cavin3	0.569435	0.000464479	0.00050452
Ahnak2	0.426115	0.000474376	0.000514929
Arl6ip5	0.399973	0.000484313	0.000525367
Smarca2	0.510343	0.000485766	0.000526594
Abca1	0.334731	0.000490702	0.000531594
Nfat5	0.483507	0.000493296	0.000534051
Tns4	0.389428	0.000502309	0.000543449
Oaf	0.390379	0.000503935	0.000544848
Matn2	0.426821	0.000532422	0.000575268
Fscn1	0.386301	0.000534772	0.000577427
Hcfc1r1	0.281884	0.000539657	0.000582317
Serpine2	0.544013	0.000551807	0.000595036
Furin	0.377432	0.000561165	0.000604729
Lama3	0.42346	0.000567477	0.00061113
Pdgfb	0.376488	0.00057478	0.000618587
Nras	0.466603	0.000594321	0.000639198
Park7	-0.253465	0.000646955	0.00069535
Map7d1	0.521913	0.000654511	0.000703009
Iffo2	0.505368	0.000682622	0.000732722
Anxa8	0.397864	0.000686704	0.000736509
Cav1	0.366659	0.000687246	0.000736509
Rab31	0.467159	0.000687499	0.000736509
Hist1h2bc	-0.651099	0.000688991	0.000737626
Socs3	0.434415	0.00069562	0.000744236
Lbp	0.434432	0.000704765	0.000753528
Gm45268	0.315353	0.000707083	0.000755513
Crip2	0.311139	0.00072275	0.00077175
Tcp11l2	0.380934	0.00073328	0.000782484
Gm15823	0.362624	0.000756594	0.000806837
Foxn3	0.513387	0.000870198	0.000927381
Baz1a	0.389291	0.000876857	0.00093387
Axl	0.438971	0.000936958	0.00099723
Fxyd4	0.793751	0.000961033	0.00102219
Rgs10	0.456951	0.000966946	0.00102781
Tmem234	-0.260578	0.000979105	0.00104006
Hes1	0.455506	0.00101111	0.00107336
Rcan1	0.571039	0.00101746	0.00107941
Smoc2	0.465422	0.00102901	0.00109095
Agl	-0.31993	0.00103909	0.00110092
Rpl36al	-0.26861	0.00105253	0.00111444
Cntfr	0.411909	0.00105581	0.0011172
Htra1	0.336638	0.00109353	0.00115636
Capg	0.293956	0.00109499	0.00115716
Itga2	0.445038	0.00111137	0.00117371
Ppp1r15a	0.52754	0.00112058	0.00118268
Col7a1	0.470013	0.00114043	0.00120285
Sbspon	0.286983	0.00115231	0.0012146
Sorcs2	0.395061	0.00119335	0.00125704
Tinagl1	0.502834	0.00119577	0.00125878
Maml2	0.340421	0.00120185	0.00126437
Pde4b	0.374237	0.00120479	0.00126666
Notch2	0.496468	0.00129303	0.00135855
Csnk1a1	0.26639	0.00131004	0.00137555
Son	0.285953	0.00131994	0.00138505
Stk40	0.450335	0.00135554	0.0014215
Plk2	0.57662	0.00137393	0.00143986
Sgms2	0.523317	0.00144564	0.00151405
Fam214b	0.459113	0.00156734	0.00164045
Dynlrb1	-0.287942	0.00172342	0.00180266
Rab34	0.321248	0.00176021	0.00183996
Ngf	0.458299	0.00178925	0.00186912
Cavin1	0.51567	0.00179972	0.00187886
Jag2	0.335564	0.00195146	0.00203598
Stbd1	0.399078	0.00203641	0.00212325
Calcb	0.609184	0.00204841	0.00213441
Ank	-0.349562	0.0020554	0.00214033
Arpc3	-0.260821	0.00214293	0.00223007
Trip6	0.425829	0.00218802	0.00227554
Pdlim5	0.438583	0.0022106	0.00229756
Gnb1	0.317494	0.00228239	0.00237067
Itgav	0.404438	0.00234255	0.00243162
Gclm	0.298707	0.00236655	0.00245498
Atp6v1b2	-0.30525	0.00240976	0.00249822
Nenf	0.257237	0.00242112	0.00250841
Mgp	0.503548	0.00244263	0.00252909
Gm48368	0.500698	0.00248388	0.00257018
S100a13	0.444351	0.00264261	0.0027327
Ezr	-0.298581	0.00269714	0.00278732
Jag1	0.52351	0.00274383	0.00283379
B4galt1	0.36058	0.00282539	0.00291619
Tnc	0.410243	0.00294494	0.00303767
Cdh3	0.416182	0.00304035	0.0031341
Sytl1	0.338666	0.00306933	0.00316198
Ngfr	0.297284	0.00309933	0.00319089
Eif3i	-0.261782	0.00316142	0.00325276
Irf6	0.46041	0.00320025	0.00329065
Ank2	0.435923	0.00329095	0.00338179
Rida	0.418243	0.00333683	0.00342679
Apoc1	0.756344	0.00335036	0.00343852
Ddx50	0.366091	0.00336494	0.00345133
Dhrs3	0.551472	0.00341582	0.00350132
Dnaja1	0.288165	0.00359118	0.00367877
Cldnd1	0.432067	0.00361433	0.00370017
Cebpd	0.565019	0.00362074	0.00370442
Gnl3	0.446993	0.00364426	0.00372616
Fam110c	0.471648	0.00366273	0.0037427
Flna	0.420978	0.00366551	0.00374321
Kitl	0.436849	0.00373753	0.00381438
Mbnl1	0.406761	0.00403941	0.0041199
Dap	-0.259774	0.00455445	0.00464231
Fhl1	0.353067	0.0046827	0.00477006
Arid4b	0.399557	0.00475685	0.00484258
Adm	0.433494	0.0049745	0.00506101
Fosl2	0.374605	0.00541701	0.00550779
Dapl1	0.470134	0.00542653	0.00551406
Tnfaip8	0.444448	0.00563872	0.00572611
Lbh	0.345603	0.00576547	0.00585121
Slc2a1	0.46238	0.00577024	0.00585242
Gabarapl1	0.301096	0.00601836	0.00610029
Slc6a6	0.453084	0.00602567	0.00610392
Prss22	0.403629	0.00641033	0.00648957
Fam133b	0.416321	0.00659331	0.00667069
Tuba1a	0.508562	0.00664651	0.00672036
Mob3c	0.277365	0.0067376	0.00680826
Zc3h15	0.270725	0.00717486	0.00724563
Ext1	0.462573	0.00752187	0.00759139
Spag9	0.404815	0.00784355	0.00791117
Unc45a	0.425112	0.00812569	0.0081907
Ndel1	0.441253	0.00817043	0.00823073
Zfp36l1	0.352106	0.00859314	0.00865123
Smu1	-0.294485	0.00869418	0.00874758
Pard3	0.443608	0.00871651	0.00876466
Ppp1r12a	0.460325	0.00874583	0.00878876
Cotl1	0.455772	0.00903968	0.00907848
Tmbim1	0.410712	0.00915155	0.00918519
Kdm5b	0.423068	0.00943703	0.00946593
Actn1	0.486404	0.00946273	0.0094859
Ly6e	-0.280309	0.00951701	0.00953447
Fblim1	0.380373	0.00956923	0.00958093
Slc39a6	0.369883	0.00973066	0.0097366
Nr4a1	0.423483	0.00985566	0.00985566
